# Supplementary material
Source: MDPI journal article supplement (https://www.mdpi.com/2075-4698/13/5/115)
Supplement: s1 [file s1]

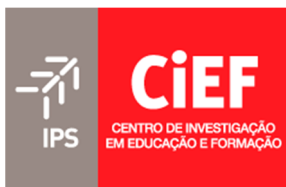

# Participação dos estudantes e qualidade das IES

Albertina Palma  
Ana Maria Pessoa  
Bruno Fragueiro  
Carla Cibebe Figueiredo  
Fernando Almeida  
Filipe Fialho  
Inês Silva  
João Pedro Pereira  
João Vinagre  
Joaquim Mourato  
Maria do Rosário Rodrigues  
Rodrigo Lourenço

Abril de 2023

# ÍNDICE

|                                                                                                                                                    |    |
|----------------------------------------------------------------------------------------------------------------------------------------------------|----|
| Índice de Quadros .....                                                                                                                            | 5  |
| Índice de Figuras .....                                                                                                                            | 6  |
| Acrónimos.....                                                                                                                                     | 7  |
| Introdução.....                                                                                                                                    | 8  |
| Capítulo primeiro Quadro conceitual e contextual.....                                                                                              | 11 |
| 1. O ensino superior na perspetiva da ação pública europeia.....                                                                                   | 11 |
| 2. A situação em Portugal .....                                                                                                                    | 15 |
| 2.1. A falta de formação e de apoio .....                                                                                                          | 16 |
| 2.2. Lacunas na informação institucional .....                                                                                                     | 17 |
| 2.3. Perceções sobre a inutilidade da participação.....                                                                                            | 17 |
| 2.4. O tempo de permanência na instituição.....                                                                                                    | 17 |
| 2.5. A assimetria do poder pedagógico.....                                                                                                         | 18 |
| 2.6. A falta de autonomia financeira.....                                                                                                          | 18 |
| 3. A participação dos estudantes: uma questão em análise .....                                                                                     | 18 |
| Capítulo segundo Metodologia de recolha e análise de dados .....                                                                                   | 20 |
| 1. A pesquisa e análise documental.....                                                                                                            | 20 |
| 2. As entrevistas.....                                                                                                                             | 20 |
| 3. Construção do questionário, definição e constituição da amostra .....                                                                           | 22 |
| 4. Análise final de resultados .....                                                                                                               | 25 |
| Capítulo terceiro análise à informação recolhida relativa a eleições e participação dos estudantes em reuniões .....                               | 26 |
| 1. Quadro jurídico.....                                                                                                                            | 26 |
| 1.1. A aplicação do RJIES pelos Institutos.....                                                                                                    | 27 |
| 1.2. Outras formas de participação dos estudantes.....                                                                                             | 28 |
| 2. Atos eleitorais.....                                                                                                                            | 28 |
| 2.1. Universos eleitorais.....                                                                                                                     | 29 |
| 2.2. Órgãos IPSetúbal e IPPortalegre.....                                                                                                          | 29 |
| 2.3. Órgãos das Escolas .....                                                                                                                      | 31 |
| 3. Reuniões dos Órgãos IP e das Escolas, que envolvem estudantes .....                                                                             | 34 |
| 3.1. Participação dos estudantes em reuniões .....                                                                                                 | 34 |
| 3.2. Assuntos em discussão .....                                                                                                                   | 36 |
| 4. Questões a considerar .....                                                                                                                     | 37 |
| Capítulo quarto perfis pessoais, relação com os pares e com a instituição – as entrevistas .....                                                   | 39 |
| Introdução (a apresentar).....                                                                                                                     | 39 |
| 1. Conhecimento do modelo de gestão das instituições de ensino superior político e das hipóteses de participação dos estudantes nele contidas..... | 39 |

|                                                                                                             |                                     |
|-------------------------------------------------------------------------------------------------------------|-------------------------------------|
| 1.1. A Participação dos estudantes.....                                                                     | 39                                  |
| 1.2. Participação nos atos eleitorais .....                                                                 | 40                                  |
| 1.3. Participação nos órgãos institucionais .....                                                           | 41                                  |
| 2. Experiências de participação.....                                                                        | 43                                  |
| 2.1. Motivos para participar/não participar nos órgãos institucionais .....                                 | 43                                  |
| 2.2. Acesso à Informação .....                                                                              | 43                                  |
| 3. Atitude e opinião sobre a participação dos estudantes no atual modelo de gestão do ensino superior.....  | 46                                  |
| 3.1. Atividades e Impacto da Participação .....                                                             | 46                                  |
| 3.2. Sugestões para incentivar a participação .....                                                         | 47                                  |
| 4. Potencial de replicação da aprendizagem feita para outras dimensões da vida cívica ou profissional ..... | 48                                  |
| 5. Notas finais .....                                                                                       | 49                                  |
| Capítulo quinto Valorização da participação, sem participação? - As respostas ao questionário .....         | 51                                  |
| 1. Análise global das respostas.....                                                                        | 51                                  |
| 2. Os fatores mais relevantes da participação dos estudantes .....                                          | 57                                  |
| 2.1. A participação dos estudantes segundo a escola .....                                                   | 58                                  |
| 2.2. A relação das respostas com o tipo de curso e o ano curricular.....                                    | 63                                  |
| 2.3. Participação e idade dos estudantes .....                                                              | 66                                  |
| Capítulo sexto Valorização da participação, sem participação? - As respostas ao questionário .....          | <b>Error! Bookmark not defined.</b> |
| 1. Análise global das respostas.....                                                                        | <b>Error! Bookmark not defined.</b> |
| 2. Os fatores mais relevantes da participação dos estudantes                                                | <b>Error! Bookmark not defined.</b> |
| 2.1. A participação dos estudantes segundo a escola                                                         | <b>Error! Bookmark not defined.</b> |
| 2.2. A relação das respostas com o tipo de curso e o ano curricular.....                                    | <b>Error! Bookmark not defined.</b> |
| 2.3. Participação e idade dos estudantes .....                                                              | <b>Error! Bookmark not defined.</b> |
| Capítulo sexto Apresentação e análise dos resultados finais.....                                            | 67                                  |
| 1. Caracterização da participação dos estudantes nos órgãos .....                                           | 67                                  |
| 2. Identificação dos fatores de facilitação e constrangimentos .....                                        | 69                                  |
| 3. Perspetivas dos estudantes sobre a sua participação na governação das IES                                | 73                                  |
| Capítulo sétimo Síntese interpretativa e discussão .....                                                    | 75                                  |
| 1. A fração participação nos processos de constituição e de intervenção nos órgãos institucionais.....      | 76                                  |
| 2. As diferentes formas e percepções da participação.....                                                   | 76                                  |
| 3. O efeito constrangedor de fatores de ordem pessoal e institucional à participação .....                  | 78                                  |

|                                                                                                              |     |
|--------------------------------------------------------------------------------------------------------------|-----|
| 4. Recomendações .....                                                                                       | 79  |
| Referências Bibliográficas .....                                                                             | 81  |
| Anexos .....                                                                                                 | 84  |
| Anexo S1 – Amostra (Inicial) e respostas .....                                                               | 85  |
| Anexo S2 – O questionário .....                                                                              | 88  |
| Anexo S3 – Listagem das ordens de trabalho das reuniões dos órgãos do IPSetúbal, realizadas em 2019 .....    | 111 |
| Anexo S4 – Listagem das ordens de trabalho das reuniões dos órgãos do IPPortalegre, realizadas em 2019 ..... | 123 |
| Anexo S5 – Notas para o guião do questionário .....                                                          | 126 |
| Anexo S6 – Guião de entrevista aos estudantes do IPP e IPS selecionados ..                                   | 129 |

## ÍNDICE DE QUADROS

|                                                                                                                                                                                            |                                     |
|--------------------------------------------------------------------------------------------------------------------------------------------------------------------------------------------|-------------------------------------|
| Quadro S1 – Caracterização dos/as estudantes entrevistados/as .....                                                                                                                        | 22                                  |
| Quadro S2 - População e Amostra por escola .....                                                                                                                                           | 24                                  |
| Quadro S3 - Média de eleitores, entre 2015 e 2020, nos diferentes universos eleitorais do IPSetúbal e do IPPortalegre. ....                                                                | 29                                  |
| Quadro S4 – Participação nas eleições do IPSetúbal .....                                                                                                                                   | 30                                  |
| Quadro S4a – Participação nas eleições do IPPortalegre .....                                                                                                                               | 30                                  |
| Quadro S5 – Número de estudantes com assento nos diferentes órgãos, número de reuniões realizadas em 2019 e percentagem média de estudantes participantes nas reuniões do IPSetúbal .....  | 34                                  |
| Quadro S6– Número de estudantes com assento nos diferentes órgãos, número de reuniões realizadas em 2019 e percentagem média de estudantes participantes nas reuniões do IPPortalegre..... | 34                                  |
| Quadro S7 – Análise dos assuntos abordados nas reuniões dos órgãos do IPSetúbal, sua distribuição por área e número médio de estudantes presentes nas reuniões..                           | 37                                  |
| Quadro S8 – Análise dos assuntos abordados nas reuniões dos órgãos do IPPortalegre, sua distribuição por área e número médio de estudantes presentes nas reuniões.....                     | 37                                  |
| Quadro S9 - Importância da participação dos estudantes por tema                                                                                                                            | <b>Error! Bookmark not defined.</b> |
| Quadro S10 - Integração dos contributos dos estudantes pela Instituição, por tema .....                                                                                                    | <b>Error! Bookmark not defined.</b> |
| Quadro S11 - Fatores que facilitam/promovem a participação na instituição .....                                                                                                            | <b>Error! Bookmark not defined.</b> |
| Quadro S12 - Fatores de limitação/impedimento da participação dos estudantes na instituição.....                                                                                           | <b>Error! Bookmark not defined.</b> |
| Quadro S13 - Modo de participação dos estudantes nos órgãos de gestão e em debates com colegas.....                                                                                        | <b>Error! Bookmark not defined.</b> |
| Quadro S14 - Nº de estudantes por tipo de curso .....                                                                                                                                      | <b>Error! Bookmark not defined.</b> |
| Quadro S15 - Nº de estudantes por ano curricular .....                                                                                                                                     | <b>Error! Bookmark not defined.</b> |
| Quadro S16 - Nº de estudantes por escalão etário .....                                                                                                                                     | <b>Error! Bookmark not defined.</b> |
| Quadro S17 - Nº de estudantes por género .....                                                                                                                                             | <b>Error! Bookmark not defined.</b> |
| Quadro S18 - Integração dos contributos dos estudantes (Sempre/ Muitas vezes) pela Instituição por tema e por escola.....                                                                  | <b>Error! Bookmark not defined.</b> |
| Quadro S19 - Fatores que facilitam/promovem a participação na instituição (Muito importante/Importante) por escola.....                                                                    | <b>Error! Bookmark not defined.</b> |
| Quadro S20 -Fatores de limitação/impedimento da participação dos estudantes na instituição (Muito importante/Importante) por escola ...                                                    | <b>Error! Bookmark not defined.</b> |
| Quadro S21 – Integração dos contributos dos estudantes pela Instituição (Sempre /Muitas vezes) por tema e por tipo de curso.....                                                           | <b>Error! Bookmark not defined.</b> |

Quadro S22 - Fatores de limitação/impedimento da participação dos estudantes na instituição (Muito importante/Importante) pelo Tipo de Curso) **Error! Bookmark not defined.**

Quadro S23 - Integração dos contributos dos estudantes Sempre /Muitas vezes pela Instituição por tema e por ano Curricular ..... **Error! Bookmark not defined.**

Quadro S24 - Fatores de limitação/impedimento da participação dos estudantes na instituição (Muito importante/Importante) pelo escolar etário **Error! Bookmark not defined.**

## Índice de Figuras

|                                                                                                                                                                                           |                                     |
|-------------------------------------------------------------------------------------------------------------------------------------------------------------------------------------------|-------------------------------------|
| Figura S1 – Apresentação com o modo de acesso ao questionário.....                                                                                                                        | 23                                  |
| Figura S2 – Taxas de participação nas eleições do IPSetúbal.....                                                                                                                          | 30                                  |
| Figura S3 – Taxas de participação nas eleições do IPPortalegre .....                                                                                                                      | 31                                  |
| Figura S4: Percentagem de estudantes votantes em cada Escola/Ano de Eleição, para os diferentes Conselhos de Representantes das Escolas do IPSetúbal. ....                                | 32                                  |
| Figura S5: Percentagem de estudantes votantes em cada Escola/Ano de Eleição, para os diferentes Conselhos Pedagógicos das Escolas do IPSetúbal.....                                       | 33                                  |
| Figura S6: Percentagem de estudantes votantes em cada Escola/Ano de Eleição, para os diferentes Conselhos Pedagógicos das Escolas do IPPortalegre. ....                                   | 33                                  |
| Figura S7: Percentagem de estudantes participantes nas reuniões dos diferentes órgãos das Escolas (Conselho de Representantes e Conselho Pedagógico) e do IPSetúbal (Conselho Geral)..... | 35                                  |
| Figura S8: Percentagem de estudantes participantes nas reuniões dos diferentes órgãos das Escolas (Conselho Pedagógico) e do IPPortalegre (Conselho Geral)...                             | 35                                  |
| Figura S9 - Tipos de participação dos estudantes.....                                                                                                                                     | <b>Error! Bookmark not defined.</b> |
| Figura S10 - Participação nos órgãos de gestão da IES                                                                                                                                     | <b>Error! Bookmark not defined.</b> |
| Figura S11 - Participação em grupos/associações por âmbito de intervenção ...                                                                                                             | <b>Error! Bookmark not defined.</b> |

## Abónimos

AA – Assoóações Académicas

AAIPS – Assoóação Académica do Instituto Politécnico de Setúbal

BFUG – Bologna Follow-Up Group

CNaPPES – Congresso Nacional de Práticas Pedagógicas no Ensino Superior

CNE – Conselho Nacional de Educação

EHEA – European Higher Education Area (Espaço Europeu do Ensino Superior)

ENQA – European Association for Quality Assurance in Higher Education

ES – Ensino superior

ESG – Standards and guidelines for quality assurance in the European Higher Education Area

ESU – European Students' Union

EUA – European University Association

EURASHE – European Association of Institutions in Higher Education

FNAEESP – Federação Nacional de Assoóações Estudantis do Ensino Superior Politécnico

IES – Instituições de ensino superior

IPP – Instituto Politécnico de Portalegre

IPS – Instituto Politécnico de Setúbal

PB – Processo de Bolonha

RJIES – Regime Jurídico das Instituições de Ensino Superior

STUPS – Participação Estudantil Sem Fronteiras

## INTRODUÇÃO

Este estudo entra-se no tema da participação dos estudantes nas instituições de ensino superior, correspondendo a uma escolha que remete para preocupações e questionamentos da equipa que o desenvolveu. De diferentes modos e em diferentes níveis, os membros da equipa têm-se confrontado com os desafios colocados pela participação dos estudantes nas instituições onde desenvolvem ou desenvolveram as suas atividades, quer como docentes, quer como estudantes.

Tendo em conta a natureza do estudo, considerou-se essencial que a equipa incluísse não só docentes, mas também estudantes, para que as perspetivas de correntes das experiências de uns e de outros, enquanto membros das respetivas comunidades e enquanto dirigentes pudessem ser naturalmente integradas. Por isso, foram firmados protocolos com a Associação Académica do IPS (AAIPS) e a Federação Nacional de Associações de Estudantes do Ensino Superior Politécnico (FNAEESP), tendo o projeto contado, desde o início, com a participação de dois estudantes representantes da AAIPS e o Presidente da FNAEESP.

O interesse por esta temática surge de uma referência comum ao reconhecimento da importância das Instituições de Ensino Superior (IES) conseguirem, de forma continuada e sistemática, ouvir os seus estudantes, conhecendo as suas opiniões sobre a estrutura e funcionamento das instituições, sobre os cursos que frequentam e relativamente às unidades curriculares que os compõem. Por outro lado, confrontam-se, com o desinteresse dos estudantes em participarem nos órgãos de gestão onde têm representantes e em votarem nos processos eleitorais que os elegem.

Aparentemente, este desinteresse dos estudantes parece relacionar-se com a fragilidade de uma atitude de participação típica dos jovens, que abrange não apenas a possibilidade de uma efetiva intervenção ao nível do contexto escolar onde se inserem, mas também nas várias esferas da vida social. Atribui-se frequentemente esta demissão de uma maior intervenção social por parte dos jovens ao seu hedonismo, ao seu desinteresse pela coisa pública, pelo seu “horror” à política (Balsa *et. al*, 2001, p. 145 e seg.).

Na verdade, estas considerações incorrem numa generalização que esquece que não podemos tratar os jovens (estudantes) como um grupo com características comuns, com atitudes e práticas semelhantes, apenas pela partilha de uma idade comum. De facto, tem de se admitir a presença de diferentes perfis de jovens a que correspondem diferentes perspetivas, diferentes atitudes e práticas, pelo que em vez de considerarmos a juventude, devemos antes considerar a realidade de diferentes juventudes (Pais, 2003, p.29).

Esta última constatação não nos permite reusar em absoluto que há um significativo desinteresse dos jovens relativamente à sua participação nas instituições de ensino superior, sabendo-se que alguns estudantes (infelizmente poucos) mostram-se mais interessados em participar e efetivamente fazem-no. Coloca-se a este propósito a questão de saber se a maior diversificação dos novos públicos do Ensino Superior verificada nos últimos anos, com a entrada de estudantes com perfis etários menos jovens, implicou um incremento dos níveis de participação estudantil.

A valorização da participação dos estudantes nas IES, defendida pelos membros da equipa deste estudo, decorre de experiências diversificadas em cargos nos órgãos de gestão da instituição a que pertencem ou pertenceram, em que se reconhece que os



estudantes, enquanto destinatários das atividades formativas desenvolvidas, têm perspetivas, eventualmente diferentes, dos que têm o poder de definir cursos, currículos, investimentos em recursos materiais e humanos, procedimentos e regras de funcionamento.

Esta diversidade de perspetivas decorre naturalmente de distâncias entre os diferentes atores presentes nas IES – docentes, funcionários não docentes e estudantes, resultantes da diferença de idade e de experiências de vida em contextos de um tempo social diferente, de diferentes níveis de formação, de diferenças sociais e culturais entre estatutos de origem, estatutos ocupados e estatutos que se perspetivam no futuro. Devido a esses distâncias, mais uma vez se realça a possibilidade de desfasamentos entre o que uns conhecem e os seus destinatários.

Com essa diferença de perspetivas e percebendo-as através da voz dos estudantes, as instituições poderão avaliar melhor a adequação da sua atividade aos públicos a que se destinam e suscitando processos de reflexão coletiva sobre mudanças que possam melhorar o que se faz e como se faz.

Como iremos abordar, considera-se que a importância atribuída à participação dos estudantes nas IES se enquadra nos princípios enformadores do Espaço Europeu de Ensino Superior, no âmbito do designado Processo de Bolonha, que, precisamente, estabelece um pressuposto de organização e funcionamento do Ensino Superior (ES) centrado no estudante. Neste âmbito, esta centragem **no estudante** refere-se à forma que devem assumir os processos de ensino-aprendizagem, rompendo com uma lógica tradicional que parte dos docentes e dos saberes disciplinares e da sua exposição, para uma perspetiva em que se reconhece o papel dos estudantes nos processos de aprendizagem e nas condições que o permitem. Mas é também a afirmação do papel dos estudantes na organização curricular e dos seus contributos no âmbito da organização e funcionamento das IES, nomeadamente através da sua presença e intervenção nos órgãos de governo das IES.

Foi o questionamento sobre um ordenamento do ES, ao nível das políticas europeias e nacionais, que afirma a importância da participação dos estudantes, que se confronta ao nível institucional com práticas desfavorecedoras dessa participação e com dificuldades na mobilização dos estudantes, que justificou o desenvolvimento deste estudo, procurando-se responder à questão: quais as características, os fatores e as perspetivas dos estudantes sobre a sua participação, na relação com a qualidade das IES.

A pertença institucional dos membros da equipa, como docentes e como estudantes e a necessidade de restringir o âmbito do estudo devido à limitação dos recursos disponíveis, foram fatores da escolha dos Institutos Politécnicos de Portalegre e de Setúbal como objetos dos processos de recolha e de análise da informação. Estas duas instituições inserem-se em contextos sociais claramente diferentes, uma no interior do país e a outra no litoral, com dimensões diferentes e especificidades nos seus projetos organizacional e formativo. Considerou-se que essa diversidade poderia constituir um fator de enriquecimento do estudo elucidando sobre como as particularidades das duas instituições se relacionam com um enquadramento comum, ao nível das políticas europeias e nacionais para o Ensino Superior.

Para o desenvolvimento deste estudo e para ser possível encontrar as respostas à questão definida enunciaram-se os seguintes objetivos:

- Caracterizar a participação dos estudantes nos órgãos de governo das IES em que têm assento e nas associações estudantis, ao longo dos últimos cinco anos;
- Identificar fatores de facilitação e constrangimentos presentes quer nas normas e nos documentos legais quer nas práticas instituídas;
- Analisar as perspectivas dos estudantes sobre a sua participação na governação das IES;
- Usar o conhecimento produzido em recomendações e propostas de ação política e institucional nesta matéria.

A seguir a esta introdução apresentar-se-á o enquadramento conceptual e contextual do estudo, em que são identificados e descritos contributos teóricos pertinentes para se entenderem as problemáticas supostas neste estudo. É também feita a referência às políticas europeias e nacionais para o Ensino Superior e aos normativos que delas resultam.

Definiu-se e concretizou-se um modelo de recolha e de análise das informações necessárias ao cumprimento dos objetivos da investigação, que articula várias técnicas, quantitativas e qualitativas, permitindo por um lado reconstituir-se um retrato global da participação dos estudantes nas duas instituições e, por outro, aprofundar e compreender as suas características e fatores. Estas opções metodológicas são explicadas no capítulo referente à metodologia do estudo.

Nos capítulos seguintes descrevem-se as informações recolhidas e analisadas através das várias técnicas utilizadas: de amostragem, de pesquisa e análise documental e dos inquéritos por questionário e por entrevista.

Finaliza-se esta relatório com as conclusões possíveis, enquanto respostas à questão e aos objetivos definidos e que são a resultante da triangulação dos dados recolhidos através das várias técnicas. Foi ainda possível chegar a algumas recomendações que correspondem a alguns eixos de intervenção institucional, que poderão contribuir para uma maior participação dos estudantes e para uma maior integração institucional dos seus pontos de vista e das suas propostas, na perspectiva da melhoria da organização e funcionamento das IES, ou seja, da sua qualidade.

## CAPÍTULO PRIMEIRO

### QUADRO CONCEPTUAL E CONTEXTUAL

A participação dos estudantes e a qualidade das instituições do ensino superior público politécnico, como em muitos outros setores do sistema educativo nacional, é uma área temática ainda pouco visível e marginal em projetos de investigação. A tendência é para se incidir o foco em questões como o sucesso académico, a igualdade de oportunidades em função do género, as disparidades regionais, entre muitas outras. O presente projeto vê-se como uma oportunidade para refletir sobre as formas de participação social e de colaboração entre estudantes e instituições locais e de regiões similares. Depois de anos em que o país desinvestiu na participação estudantil nas instituições, o período democrático tem vindo a identificar competências sociais, intelectuais, de qualidade e intervenção necessárias a uma outra sociedade construída como um regime participativo e diverso, em que o outro (Kapusinski, 2009) é visto como adversário, mas não como inimigo (Mounk, 2019).

Neste campo, as inovações pedagógicas (incluindo as tecnológicas) são um elemento que altera todo o processo de ensino-aprendizagem e de intervenção nas IES. Mais participação, quer dentro das salas quer nos órgãos de gestão, de representação de estudantes e de ligação aos órgãos de decisão nacionais é imprescindível para aumentar o papel de intervenção que devem ter, a nível nacional e europeu, as referidas IES.

Com foco em duas instituições do ensino superior politécnico português, espera-se que a reflexão sobre os resultados deste projeto permita tornar mais visível as forças opostas e fomentadoras de uma participação inovadora e reflexiva dos estudantes nas IES em análise.

## 1. O ensino superior na perspetiva da ação pública europeia

O projeto aborda o tema da participação dos estudantes na governação do ensino superior, um tema particularmente relevante no âmbito das políticas do ensino superior na Europa que, desde o ano 2000, estão orientadas para a construção do Espaço Europeu do Ensino Superior (EHEA), através do Processo de Bolonha.

Conceptualmente, o projeto inspira-se nos estudos de sociologia da ação pública (Commaille, 2019; Barroso, Carvalho, Fontoura & Afonso, 2007) que rompe com a visão tradicional da política enquanto processo sequencial, top-down (decisão, implementação, avaliação), a partir de uma autoridade reconhecida como tal, ou seja, o Estado.

A política vista como ação pública, pelo contrário, tem em conta a realidade atual em que as políticas se desenvolvem, com a intervenção de múltiplos atores que se movem em instâncias, espaços sociais multinível, ou fóruns mediatizados (Jobert, 2004; Boussaguet, 2019), tais como, por exemplo, associações profissionais ou corporativas, grupos de interesse, estruturas nacionais ou transnacionais de decisão política, consultivas, estratégias ou outras. As interações que esses atores estabelecem e os jogos de poder que aí ocorrem provocam ruturas no processo de decisão, deste modo subvertendo a linearidade do mesmo (Delvaux, 2009).

De acordo com esta perspectiva teórica, no quadro atual de ação pública europeia, os estudantes do ensino superior são atores que entram no jogo político da decisão e da ação e são reconhecidos como tal, nomeadamente no âmbito do Processo de Bolonha. Os estudantes são membros consultivos permanentes do Processo de Bolonha desde o início (Praga, 2001), sendo considerados elementos-chave para a qualidade do ensino e parceiros no processo de criação do EHEA. Nesse sentido, têm assento no fórum principal do Processo de Bolonha, o Bologna Follow-Up-Group (BFUG), através da European Students' Union (ESU, previamente ESIB), estrutura que representa as federações das associações de estudantes dos países europeus. No que concerne particularmente à garantia da qualidade, a ESU, juntamente com a *European University Association* (EUA), a *European Association of Institutions in Higher Education* (EURASHE) e a *European Association for Quality Assurance in Higher Education* (ENQA), integrou o grupo E4, grupo de trabalho criado pelo BFUG em 2003 para desenvolver a política de qualidade do EHEA (Berlim, 2003) de onde emergiram os *European Standards Guidelines for Quality Assurance* (ESG 2005, 2015), documento orientador da qualidade no EHEA, no âmbito do qual os estudantes são considerados *stakeholders*.

A perspectiva da garantia da qualidade subjacente ao EHEA está em sintonia com a nova abordagem à qualidade que Foster & Jonker (2003) designaram de Terceira Geração da Qualidade considerando que o sucesso sustentável é atingido pela satisfação, consistente, e no longo prazo das necessidades e expectativas dos *stakeholders*, entendendo aqui “*stakeholder*” como “*any group or individual who can affect or is affected by the achievement of the organization's objectives*” (Freeman, 1984, p. 46). Nesse sentido, a norma ISO 9004 (2009), que define as linhas de orientação para organizações com sucesso sustentável, preconiza que estas devem desenvolver o seu sistema de gestão da qualidade organizacional de modo a garantir o uso eficiente dos recursos, a tomada de decisões baseada em fatos e a focalização na satisfação dos clientes e nas necessidades e expectativas dos *stakeholders*.

Alinhados com esta perspectiva, os ESG redefinem o papel dos estudantes, passando a considerá-los *stakeholders*-chave não só na governação, mas também nos processos da sua própria formação:

*“stakeholders are understood to cover all actors within an institution, including students and staff, as well as external stakeholders such as employers and external partners of an institution”, (ESG, 2015, p. 6).*

Nos ESG, que constituem o atual guião para a qualidade das instituições de ensino superior europeias, há a assinalar quatro aspetos com particular interesse para o presente estudo: os princípios; os objetivos; as implicações; a relevância das diretrizes.

No plano dos princípios, destaca-se, em primeiro lugar, o facto de não ser adotado um conceito universal de qualidade. A qualidade é antes considerada dependente de cada contexto e definida pelos respetivos atores, devendo responder às suas necessidades e expectativas:

*“... stakeholders, who may prioritize different purposes, can view quality in higher education differently and quality assurance needs to take into account these different perspectives. Quality, whilst not easy to define, is mainly a result of the interaction between teachers, students and the institutional learning environment” (ESG, 2015, p.7).*

Nessa medida, a Norma 1.1. dos ESG estabelece que compete às IES, no âmbito da sua gestão estratégica, montar e divulgar publicamente um sistema e uma política da qualidade envolvendo todos os *stakeholders* internos e externos:

*“Institutions should have a policy for quality assurance that is made public and forms part of their strategic management. Internal stakeholders should develop and implement this policy through appropriate structures and processes, while involving external stakeholders”* (ESG, 2015, p.11).

Os objetivos dos ESG são explicitamente a prestação de contas e a melhoria contínua. Sendo que o foco recai no processo de **ensino aprendizagem no ensino superior**, são enunciados os múltiplos objetivos do ensino superior, entre os quais se inclui a preparação dos estudantes para uma cidadania ativa e para o emprego, bem como o apoio ao desenvolvimento pessoal (ESG 2015, p. 7). Na prossecução destes objetivos, a Norma 1.3 é de superior importância ao proclamar a centralidade do estudante nos processos de aprendizagem, de ensino e de avaliação:

*“Institutions should ensure that the programmes are delivered in a way that encourages students to take an active role in creating the learning process, and that the assessment of students reflects this approach”* (ESG, 2015: 12).

Esta abordagem à participação dos estudantes explicitada nos ESG pressupõe a centralidade do papel dos estudantes no processo de ensino-aprendizagem, na perspetiva da garantia da qualidade. O novo papel do estudante para o qual aponta a Norma 1.3 exige, ele próprio, por parte das IES, a organização de uma formação para a cidadania ativa, integrada na formação profissional e pessoal dos seus estudantes, exigindo, ainda, metodologias de formação centradas no estudante. Em consonância com estas normas, o ensino superior, tradicionalmente focado no conhecimento científico e técnico e não na formação global e desenvolvimento do estudante, tem vindo a enveredar por novas abordagens e práticas pedagógicas que configuram um paradigma educativo inovador neste nível de ensino. O próprio Processo de Bolonha para a construção do EHEA incorpora este paradigma ao traçar como meta para o período 2010-20 a promoção da garantia da qualidade alinhada com os ESG, incluindo o desenvolvimento de metodologias de ensino-aprendizagem centradas no estudante e a participação dos estudantes na gestão do sistema (Declaração de Yerevan, 2015).

A relevância destas diretrizes perpassa no discurso político europeu a partir do ano 2000, como se pode verificar pelos documentos relativos às primeiras ministeriais do PB, quer por parte do EHEA e da ENQA quer por parte da ESU. A participação “plena” de estudantes e de pessoal na governação do ensino superior surge como “parte integrante dos valores Europeus da autonomia institucional, liberdade académica e equidade social” (Leuven/Louvain-la-Neuve Communiqué, 2009), constituindo “um traço definidor” e a “espinha dorsal” do EHEA” (Paris Communiqué, 2018). Consequentemente, é assumido o compromisso de apoiar a participação de estudantes e de pessoal nas estruturas de decisão europeias, nacionais e institucionais:

*“We commit ourselves to working towards a more effective inclusion of higher education staff and students in the implementation and further development of the EHEA. We fully support staff and student participation in decision-making structures at European, national and institutional levels”* (Budapest-Vienna Declaration on the European Higher Education Area, 2010).

*“... Establish conditions that foster student-centered learning, innovative teaching methods and a supportive and inspiring working and learning environment, while continuing to involve students and staff in governance structures at all levels” (Buřharest Communiqué (2012, p. 5).*

Por parte da ENQA há igualmente o compromisso de encorajar e assegurar a participação dos estudantes na garantia da qualidade como membros de pleno direito:

*“ENQA urges all member states to encourage student participation in quality assurance as full members of the process and to ensure that existing legislation does not hinder students from participating in external quality assurance” (ENQA, 2018).*

Por seu turno, os estudantes também reclamam para si o estatuto de membro de pleno direito:

*“Students are - or should be - full, or equal, members of the academic community.” (ESU, 2013, p. 6).*

Pese, embora, a presença dos estudantes nas estruturas de decisão europeia, nacional e local, do ponto de vista da ação pública, é importante analisar as fontes e os jogos de poder em presença em cada uma delas, bem como as hierarquias de atores que emergem e os modos como impõem razões e interesses setoriais (Muller, 1995). Não basta ter assento em fóruns, órgãos ou estruturas para ter uma influência diferenciadora no processo de decisão. Importa, pois, compreender qual o poder real que os estudantes detêm, como é que este se caracteriza e quais as condições reais que existem aos vários níveis do sistema, para a afirmação e integração das suas perspectivas nas políticas do ensino superior, ou seja, importa encontrar razões explicativas para as afirmações dos estudantes ao longo da década e que contrariam o discurso da participação, tais como, por exemplo:

*“Both at national and institutional levels, it can generally be said that students aren’t considered as full partners, **neither in practice nor in theory** (ESIB, 2003: 37); “The position of students has been **empowered on the policy level, but the real involvement is not yet a reality**” (ESU, 2018, p. 7).*

Assim sendo, uma das últimas publicações da ESU, da série Bologna with Student Eres, não deixa margem para dúvidas quanto ao imperativo de integrar a participação dos estudantes na governação das IES europeias. A ESU estabelece 20% como o mínimo de participação que deve ser imposto por lei:

*“The minimum should be **no less than 20% to grant the students a realistic influence on decisions**. States should make the legal requirement universal to all higher education institutions and in dialogues **with HEIs making sure that they are enacted**” (ESU, 2018, p. 8).*

A ESU propõe, ainda, a retirada do estatuto de membro do EHEA aos países que não respeitem o direito à auto-organização dos estudantes:

*“Respect for students’ right to self-organize and advocate their opinions on higher education **should be an absolute requirement put on any EHEA country**. Member states and potential members who fail to do so must commit to, and show substantial improvement on, student representation within the timeline of two ministerial conferences. **If not their status as an EHEA member should be revoked**” (ESU, 2018: 24).*

## 2. A situação em Portugal

Em consonância com o estatuto que detêm ao nível do EHEA, em Portugal, os estudantes têm assento nas estruturas com influência na definição das políticas do ensino superior e noutras estruturas de âmbito estratégico, pedagógico e de avaliação, de acordo com os estatutos próprios de cada uma. A legislação nacional determina a representação dos estudantes no Conselho Coordenador do Ensino Superior (Decreto Regulamentar n.º 15/2009, Artigo 2º) e no Conselho Nacional de Educação (Decreto-Lei n.º 125/82, Artigo 3º), bem como no Conselho Consultivo da Agência de Avaliação e Acreditação do Ensino Superior (Decreto-Lei n.º 369/2007, Artigo 15º). A representação dos estudantes está, ainda, contemplada no processo de avaliação e acreditação (Lei n.º 38/2007, de 16 de agosto, Artigos 12.º, 17.º e 18.º).

No que respeita às associações de estudantes, estas são enquadradas pelo Regime Jurídico do Associativismo Jovem (RJAJ) - Lei n.º 23/2006, de 23 de junho, alterada pela Lei n.º 57/2019, de 7 de agosto, que lhes confere o direito de emitirem pareceres sobre o processo de elaboração de legislação sobre o ensino (n.º 1 do Artigo 17.º) e de serem consultadas e informadas pelos órgãos de gestão das escolas (Artigo 18.º). Além disso, as associações académicas do ensino superior têm direito a participar na definição da política educativa, na elaboração da legislação e na vida académica (Artigos 19.º, 20.º e 21.º). O estatuto do dirigente associativo jovem estudante do ensino superior é estabelecido nos Artigos 23.º, 24.º e 25.º da mesma lei.

Ao nível das IES, a representação dos estudantes no Conselho Geral é definida no n.º 2 do Artigo 81.º da Lei n.º 62/2007, de 10 de setembro (RJIES). De acordo com a lei, os representantes dos estudantes são eleitos pelo conjunto dos estudantes, devendo constituir, pelo menos, 15% da totalidade dos membros do Conselho Geral. A presença dos representantes dos estudantes é igualmente obrigatória no Conselho Pedagógico das IES (Artigo 104.º e Artigo 146.º), sendo ainda possível nas reuniões do Conselho de Gestão, sem direito a voto (n.º 2 do Artigo 94.º). Em complementaridade aos direitos conferidos pela legislação atrás referida, o RJIES (2007) introduz a figura do Provedor do Estudante (Artigo 25.º), como um mediador da voz dos estudantes.

Não obstante os direitos contemplados nos diplomas legais, é inegável que a aprovação do RJIES (2007) constitui um retrocesso no que respeita à representação dos estudantes no governo e na gestão das instituições comparativamente com o que estava estabelecido pela legislação anterior (Lei n.º 108/88, de 24 de setembro; Lei 54/90, de 5 de setembro). Não só a representação dos estudantes nos órgãos foi reduzida como se extinguiu a representação direta ou por inerência das Federações e Associações Académicas e de Estudantes, como, por exemplo, no órgão de direção das unidades orgânicas. O movimento associativo estudantil, em sintonia com as recomendações da ESU (ESU, 2020), já se posicionou em relação ao assunto, propondo a alteração do mínimo da representação estudantil para 20%, contra os atuais 15% previstos na alínea b), do n.º 4 do art.º 81.º no RJIES (2007).

No plano institucional, é certo que a academia portuguesa tem vindo a dar ênfase à promoção de práticas orientadas para a participação, nomeadamente no processo de ensino-aprendizagem. Novas experiências pedagógicas têm sido divulgadas na comunidade, incluindo a formação para a cidadania ativa e a adoção de metodologias inovadoras de ensino-aprendizagem e de avaliação que se encontram em expansão, quer através de projetos locais quer no âmbito de parcerias europeias. Embora ainda a um nível insuficiente (Alves, 2020), é evidente a centralidade que atualmente tem

vindo a ser dada ao estudante, o que se comprova através da organização de seis edições do Congresso Nacional de Práticas Pedagógicas no Ensino Superior (CNaPPES), com um número de comunicações muito elevado (CNaPPES.21).

Ainda assim, a situação na prática continua a não corresponder ao preconizado no discurso político oficial. Isso mesmo é reconhecido na Recomendação 4/2022 do Conselho Nacional de Educação sobre Participação dos jovens no ensino superior (CNE, 2022). A Recomendação faz um ponto de situação relativo ao quadro legal da participação dos estudantes no ensino superior tanto na Europa como em Portugal, bem como uma resenha do trabalho desenvolvido ao nível de práticas pedagógicas inovadoras. As recomendações vão no sentido do aumento e diversificação de formas de participação estudantil quer no plano legislativo ao nível nacional, quer no plano institucional.

No que respeita às perceções dos estudantes sobre a sua participação, assinala-se o desenvolvimento de um projeto europeu, o projeto Participação Estudantil Sem Fronteiras (STUPS, 2020), da do qual a Universidade de Évora é parceira e que tem como objetivo geral promover uma rede europeia para o desenvolvimento de novas práticas de participação estudantil no ensino superior que possam promover a inovação social e a inclusão. Num estudo, desenvolvido no âmbito deste projeto, em que se inquiriram 250 estudantes universitários da mesma instituição, dá-se conta de que a perceção dos estudantes é de que a participação se irrealiza demasiado à ação das associações académicas, embora a sala de aula surja, com menos frequência, como espaço de intervenção relevante (Costa et. al, 2020, p. 10). Quanto aos obstáculos à participação, a conclusão do estudo é de que estes surgem associados fundamentalmente a fatores de ordem pessoal: “desconhecimento sobre os direitos associados à participação estudantil, a dificuldade de conciliação com o estudo, a falta de tempo, a falta de motivação pessoal e a inibição à exposição pública” (idem).

Além dos obstáculos de ordem pessoal identificados no projeto referido, a nossa pesquisa detetou outros, de natureza e origem diferentes, nomeadamente em documentos da situação reportada pela ESU os quais encontram paralelo num estudo prévio a este, desenvolvido no IPS (Palma, 2020). Dá-se conta a seguir do conjunto de obstáculos reportados.

## 2.1. A falta de formação e de apoio

A participação nos órgãos de decisão e a representação de colegas exige competências específicas que não são em geral desenvolvidas ao longo do percurso de aprendizagem dos estudantes e que surge como um trabalho suplementar a que nem todos os estudantes têm acesso. Esta realidade leva a ESU a propor medidas concretas para ultrapassar o problema:

HEIs and national bodies are essential in the induction of local and national representatives. **Students who will hold seats on boards and councils should receive the appropriate practical information before their first meeting and have access to support throughout their mandate** to ensure that they can participate fully without practical or administrative barriers (ESU, 2015, p. 17).

**Support structures should be put in place for student representatives** to enable them to adequately perform their job and duties on behalf of their peers.



This includes **trainings of high quality** on the work of the forum they enter and the structures, rules and culture in decision-making. **Students' unions should be seen as a partner in providing this and get support for doing so** (ESU, 2018, p. 24).

## 2.2. Lacunas na informação institucional

Num inquérito às associações de estudantes, identificou-se, ao nível da informação institucional, a existência de “*disparities between students and staff*” (ESU, 2018: 21). Em relação com esta problemática foram igualmente identificadas lacunas na informação institucional disponibilizada, nos vários relatórios anuais da Provedoria do Estudante do IPS, (Palma, 2020). As falhas de informação vão desde questões associadas com o desenvolvimento curricular e a avaliação, em geral irrelevantes à sala de aula, até a agendas ou decisões dos órgãos de governo que prejudicam a eventual reflexão e intervenção dos estudantes.

## 2.3. Perceções sobre a inutilidade da participação

Os estudantes estão em minoria nas estruturas e não conseguem que os seus contributos sejam integrados no processo de decisão, donde decorre a constatação da inutilidade da participação: “... pouca intervenção específica dos estudantes para a qualidade institucional prendem-se com a sua auto percepção de utilidade dessa intervenção” (Palma, 2020). Algo semelhante é reportado pela ESU:

Our unions recognise two threats to democratic student participation: students **are not able to pick their own representatives**, or the procedure is lacking transparency; participation is **constrained to minor decisions, or no “real” influence is provided**; student representatives make up **a tiny minority in decision-making** (ESU, 2018: 19)

## 2.4. O tempo de permanência na instituição

O tempo de permanência na instituição, em comparação com o volume de trabalho adicional que os cargos exigem, provoca descontinuidades no trabalho:

Students stay at their university **for a limited time**, which leads to high turnover rates among their representatives. Even in cases where someone would study for five years at the same institution pursuing a master's degree, it is highly unlikely that throughout all of those years an individual would represent students in one decision-making body. This often **causes students to join a preparatory or decision-making body mid-mandate, or from a position of not knowing the other participants**. When getting (s)electe**d more time has to be spent preparing for meetings, and/or information is hard to access**. (ESU, 2018, p. 22).

Um outro aspeto deste obstáculo também identificado nos relatórios da Provedoria do IPS consiste na pressão que os estudantes sentem para terminar os cursos no tempo previsto e que torna a participação na vida institucional uma carga de trabalho adicional.

## 2.5. A assimetria do poder pedagógico

Estudantes e docentes mantêm uma relação de poder desigual que provém quer dos efeitos da avaliação pedagógica quer dos conhecimentos que uns e outros conseguem mobilizar:

There is a higher risk of representatives becoming overwhelmed by the knowledge required, know-how and information held by others in the academy community or external representatives. **Having to argue with your own teachers, that already are in a power relation to you**, does not make it more accessible (ESU, 2018, p. 22).

## 2.6. A falta de autonomia financeira

A dependência do financiamento institucional, aliada à falta de cultura de participação estudantil é ainda outro dos obstáculos identificados pela ESU (2018, p. 21).

As razões dos estudantes para a pouca participação atrás expostas permitem agrupar um número significativo de obstáculos que são de natureza diversa e que apontam para várias dimensões da participação. Além do quadro político regulador das possibilidades reais da participação dos estudantes, assinalam-se como obstáculos a pouca formação que interfere com a motivação para o exercício de cargos, sendo, ainda, de considerar uma dimensão institucional relativa à cultura das instituições que condiciona a participação, nomeadamente a informação disponibilizada, a valorização da participação e as fontes do financiamento.

## 3. A participação dos estudantes: uma questão em análise

A participação própria e diferenciadora dos estudantes não deve ser desligada da questão central que constitui a participação democrática e a cidadania ativa dos jovens. Como realça o a “Carta Europeia Revista da participação dos jovens na vida local e regional”,

**“A participação e a cidadania ativa** (dos jovens) supõem ter o direito, os meios, o espaço, a oportunidade e, quando seja necessário, **o apoio para participar e influenciar as decisões**, e para tomar parte em ações e atividades destinadas a construir uma sociedade melhor” (Conselho da Europa, 2003).

Este conceito de participação, que pressupõe uma relação de parceria, envolve todo o processo de tomada de decisão, desde a organização da agenda até à monitorização das decisões (Klemenčič, 2012). É este conceito que os estudantes mobilizam quando afirmam:

*“Student Participation is not just a tool for students to complain about classes that they dislike, it is a fundamental way to shape learning paths and therefore to shape the society of the future.”* (ESU, 2020, p. 14).

Como mencionado na seção anterior, é possível distinguir três dimensões na participação dos estudantes: uma dimensão política, já que é o quadro legal que estabelece os direitos, os limites formais e as condições democráticas à participação; uma dimensão institucional, que determina a medida em que a participação é

valorizada, promovida e apoiada ao nível local; uma dimensão pessoal que impõe a cada estudante os limites da sua motivação e das suas competências para o exercício de uma participação efetiva. Estas três dimensões constituem um sistema de inter-relações que podem ser abordadas a partir das interações que se estabelecem entre si e que influenciam situações específicas em determinados momentos da realidade.

O ponto de partida para o presente estudo é a procura de compreensão de razões que levam ao desfasamento entre o discurso político da importância da participação e a situação na prática, ou seja, quais são os fatores que facilitam e os que colocam obstáculos à participação dos estudantes.

## **CAPÍTULO SEGUNDO**

### **METODOLOGIA DE RECOLHA E ANÁLISE DE DADOS**

Foi desenvolvido um estudo transversal com metodologias mistas, quantitativas e qualitativas, (Bryman, 2012, p. 59 e 627), com incidência na participação dos estudantes nos órgãos de gestão institucional, procurando também captar outras formas de participação informal eventualmente condicionadoras da participação nos órgãos. A investigação centrou-se em duas IES do ensino superior político, uma do litoral, de média dimensão, e outra do interior, de pequena dimensão.

Usaram-se várias técnicas de recolha e de análise de dados aplicados em sequência temporal. Neste sentido, foram usados a pesquisa documental, a entrevista e o questionário em três fases distintas. A cada fase e técnica correspondeu uma análise de dados conducente aos respetivos resultados da qual resultou a seleção de informação a recolher na fase seguinte. Finalmente, procedeu-se a uma análise global dos resultados, que para o efeito foram organizados em categorias de correntes dos objetivos da investigação.

#### **1. A pesquisa e análise documental**

Foram realizados três tipos de pesquisa. Uma pesquisa documental relativa ao quadro legal e regulamentar nacional (tendo por base o RJES) e as formas adotadas pelas duas IES em análise, para a implementação da participação dos estudantes (constituindo elementos de análise os respetivos Estatutos). Para o efeito foi efetuada uma análise do conteúdo das normas e realizado o levantamento dos órgãos onde os estudantes têm assento.

Uma outra pesquisa consistiu no levantamento de dados quantitativos relativos à participação dos estudantes em atos eleitorais para os órgãos de gestão e para os órgãos dirigentes das associações académicas, decorridas no período 2015-2020. Tal foi possível através da análise estatística dos números de votantes constantes nas atas dos referidos atos eleitorais, solicitados às Presidências de ambos os IP.

Finalmente, foi efetuada uma análise à participação dos estudantes nas reuniões dos órgãos para os quais foram eleitos, decorridas no mesmo período 2015-2020 nas duas IES, e às temáticas inseridas nas ordens de trabalho das mesmas reuniões. A análise estatística foi efetuada tendo por base as ordens de trabalho das reuniões dos órgãos e as listas de presenças nas reuniões, fornecidas pelas Presidências de ambos os IP.

#### **2. As entrevistas**

As entrevistas foram consideradas um meio adequado e eficaz para obter informação, de forma contextualizada e aprofundada, acerca da participação dos estudantes em cada Instituto Político (IP) e nas respetivas Instituições de Ensino Superior (IES) e, adicionalmente, em outros órgãos específicos e representativos dos estudantes a nível nacional. Considerou-se que seria importante auscultar estudantes, os que nos últimos anos e/ou na atualidade assumissem uma representação nos órgãos institucionais considerados pela legislação vigente, assim como aqueles que não a tinham. Os primeiros foram denominados, de forma genérica, como “estudantes com cargos institucionais” e os outros como estudantes “sem cargos institucionais”. Foram

efetuadas dezasseis (16) entrevistas a estudantes dos dois IP que participam no projeto e ainda uma outra ao presidente da Federação Nacional de Associações de Estudantes do Ensino Superior Politécnico (FNAEESP), que estuda num outro IP. Procurou-se uma distribuição do número de entrevistas proporcional ao número de estudantes de cada IP, pelo que foram entrevistados nove estudantes do IPS e cinco do IPP. O universo das entrevistas incluiu estudantes que participam em um ou mais órgãos de gestão e outros que optam por não o fazer. Relativamente ao modo de seleção em relação aos estudantes com cargos institucionais, fez-se primeiro a lista de todos os órgãos institucionais existentes no IP com representação estudantil e depois privilegiou-se a sua escolha com base na inserção nesses diversos órgãos, dadas as suas diferentes funções e características, de forma a obtermos opiniões consonantes com essa diversidade. Assim, escolheu-se em cada IES ou IP um órgão diferente (por exemplo num deles o Conselho Pedagógico, no outro o Conselho de Representantes, o Conselho Académico, etc.) e solicitou-se ao presidente de cada um desses órgãos em cada um dos IP que indicasse três estudantes, tendo-se contado o primeiro dessa lista e, em caso de ausência de resposta positiva ao convite, convidava-se o elemento seguinte da lista. Em relação aos estudantes sem cargos institucionais, selecionou-se aleatoriamente um curso de cada uma das UO do IP e nesse curso, um ano e uma lista de estudantes da turma desse ano. Contado o primeiro deles através de um *mail* convite, em que se explicava o estudo e a proposta de entrevista, só em caso de recusa se procedia aos restantes contatos. Estes procedimentos, apesar de algo morosos, foram bem-sucedidos, à exceção de um curso do IPS em que não se tendo obtido qualquer resposta, se optou por selecionar outro curso. De qualquer modo assinalou-se uma dificuldade bastante maior com os estudantes sem cargos institucionais pois, neste grupo, mesmo quando houve uma resposta positiva, registaram-se ausências no dia da entrevista. Por esta razão, foram entrevistados mais estudantes com cargos institucionais (10 com cargos e 6 sem cargos).

As entrevistas, semiestruturadas, foram realizadas com base num guião (Anexo 6) organizado em quatro blocos que, nos quais se integravam várias questões associadas. As entrevistas, individuais, foram conduzidas por um dos investigadores da equipa, havendo um outro presente, que caso sentisse necessidade poderia também intervir. Todas foram realizadas a distância, usando uma plataforma digital e foram gravadas, obtendo-se obviamente para tal a autorização do entrevistado (com preenchimento do consentimento informado). A duração de cada entrevista variou entre os 30 e os 60 minutos, em casos excecionais um pouco mais. Em termos de tratamento e análise, usou-se um *software* de transcrição automática, com audição e correção do texto por cada um dos investigadores ao qual a tarefa foi atribuída. Na categorização usou-se uma grelha prévia de categorias definida a partir do guião de entrevista, sempre que necessário voltou-se, contudo, à entrevista integral para esclarecimento de dúvidas ou a resumo de algum aspeto importante. No quadro seguinte descreve-se de forma sintética as características dos entrevistados.

Quadro S1 – Caracterização dos estudantes entrevistados

|                                      | Estudantes | IP e tipo de representatividade (escolha)                  | Outros cargos designados na entrevista            | Idade/residência                 |
|--------------------------------------|------------|------------------------------------------------------------|---------------------------------------------------|----------------------------------|
| Estudantes com cargos institucionais | AC         | IPS/ Viúe-presidente da AIIPS                              | Conselho Pedagógico<br>Conselho de Representantes | 23 anos/Barreiro                 |
|                                      | JPC        | IPS/Conselho de Representantes da Escola Superior de Saúde | Associação Académica<br>FNAESP(Desporto)          | 21 anos/Setúbal                  |
|                                      | RP         | IPP/Conselho Pedagógico /ESTG                              |                                                   | F                                |
|                                      | IS         | IPS/Conselho Geral ESE                                     | Conselho Geral IP<br>Associação Académica         | 25 anos/F                        |
|                                      | TC         | IPP/Presidente da AAIPP                                    | Conselho Académico (por inerência)                | 22 anos/Sines                    |
|                                      | DA         | IPP/Presidente da AAIPP                                    | Conselho Geral IP<br>Conselho Pedagógico          | 22 anos/F                        |
|                                      | NA         | IPS/Conselho Académico                                     | Conselho de Representantes<br>Conselho Pedagógico | 30 anos/Vila Nova de Santo André |
|                                      | GD         | IPS/Conselho Pedagógico ESCE                               | Conselho Académico<br>Núcleo de Curso (AIIPS)     | 23 anos/F                        |
|                                      | AF         | IPS/Conselho Pedagógico EST Barreiro                       | Núcleo de Curso (AIIPS)                           | 19 anos/F                        |
|                                      | JP         | FNAESP (presidente)                                        | Associação Académica (presidente)                 | 24 anos/Barcelos                 |
| Estudantes sem cargos institucionais | BO         | IPP/ESAE/Curso de Enfermagem veterinária                   | —                                                 | 23 anos (proveniente da Madeira) |
|                                      | BB         | IPS/ESCE/Curso de Gestão de Sistemas de Informação         | —                                                 | 23 anos, Alentejo                |
|                                      | AC         | IPS/ESE/Curso de Comunicação Social                        | —                                                 | 21 anos/Almada                   |
|                                      | BS         | IPS/EST/Curso de Ambiente e do Mar                         | —                                                 | 21 anos, Seixal                  |
|                                      | PR         | ESTB/Curso de Engenharia Civil                             | —                                                 | 43 anos, Palmela                 |
|                                      | JP         | IPP/ ESTG, Curso de Design de Comunicação                  | —                                                 | F                                |

Dos entrevistados 9 são do sexo feminino e 7 do sexo masculino. Relativamente aos estudantes com cargos institucionais a maioria são do sexo masculino (7 do sexo masculino e 3 do sexo feminino).

### 3. Construção do questionário, definição e constituição da amostra

Na construção do questionário aplicado neste estudo consideraram-se as perspetivas teóricas sobre o tema descritas no quadro teórico e contextual (Capítulo primeiro), as informações que decorreram da pesquisa e análise documental e as respostas conseguidas nas entrevistas, o que conduziu à identificação das seguintes dimensões, incluídas posteriormente na estrutura do questionário:

- Valorização da participação dos estudantes;
- Integração institucional dos contributos dos estudantes;
- Fatores de facilitação / promoção da participação;
- Fatores de limitação ou impedimento da participação;
- Modos de participação efetiva;
- Caracterização pessoal e académica.

O questionário (anexo 2) foi construído, disponibilizado e respondido através da plataforma de inquéritos do IPS, baseada na aplicação *LimeSurvey*.

Foi garantido o anonimato das respostas e os respondentes tiveram a possibilidade de darem o seu consentimento à sua participação no inquérito.

Foram previamente consultados os responsáveis pela proteção de dados dos IP de Portalegre e de Setúbal e a Comissão de ética do IP de Setúbal.

A partir da população definida para o estudo - os estudantes dos Institutos Politécnicos de Portalegre e de Setúbal de Cursos de Licenciatura, Mestrados e CTESP, foi constituída uma amostra estratificada por escola e curso e por "faixas", pela escolha aleatória das Unidades Curriculares (UC) de cada ano/curso, sendo os respetivos estudantes considerados na seleção dos que iriam responder ao inquérito.

As respostas dos estudantes foram recolhidas nos meses de março a maio de 2022 e ocorreu numa das aulas das UC esboçadas no processo de amostragem, em que o respetivo docente pedia o preenchimento do questionário através de dispositivos móveis, mostrando para o efeito um *link* e um *QRcode* que permitiam o acesso ao questionário (Figura 1)

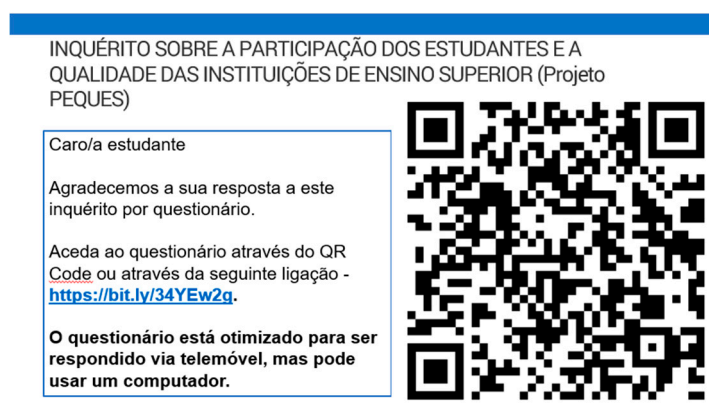

Figura S1 – Apresentação com o modo de acesso ao questionário

Inicialmente, foi definida uma amostra com uma dimensão que assegurava uma representatividade muito significativa, com um nível de confiança de 99,7% e um erro amostral de 3%. Esta amostra era constituída por 1 995 estudantes da população definida para o estudo.

**Quadro S2 - População e Amostra por escola**

| IP           | População                                              |          |                 | Amostra   |                 |                 |                  |
|--------------|--------------------------------------------------------|----------|-----------------|-----------|-----------------|-----------------|------------------|
|              | Escola                                                 | Nº estud | Nº estud (em %) | Nº estud. | Nº Estud. + 20% | Nº de respostas | Taxa de Resposta |
| IPPortalegre | Escola Superior Agrária de Elvas (ESAE)                | 438      | 4,4%            | 37        | 44              | 27              | 61,4%            |
|              | Escola Superior de Educação e Ciências Sociais (ESECS) | 572      | 5,8%            | 48        | 57              | 48              | 84,2%            |
|              | Escola Superior de Saúde (ESS/IPP)                     | 447      | 4,5%            | 37        | 45              | 42              | 93,3%            |
|              | Escola Superior de Tecnologia e Gestão (ESTG)          | 835      | 8,5%            | 70        | 84              | 96              | 114,2%           |
|              | Total IPP                                              | 2.292    |                 | 192       | 230             | 213             | 92,6%            |
| IPSetúbal    | Escola Superior de Ciências Empresariais (ESCE)        | 2582     | 26,2%           | 216       | 259             | 105             | 40,5%            |
|              | Escola Superior de Educação (ESE)                      | 941      | 9,5%            | 79        | 94              | 145             | 154,3%           |
|              | Escola Superior de Saúde (ESS/IPS)                     | 745      | 7,6%            | 62        | 75              | 61              | 81,3%            |
|              | Escola Superior de Tecnologia de Setúbal (ESTS)        | 2523     | 25,6%           | 211       | 253             | 312             | 123,3%           |
|              | Escola Superior de Tecnologia do Barreiro (ESTB)       | 781      | 7,9%            | 65        | 78              | 83              | 106,4%           |
|              | Total IPS                                              | 7.572    |                 | 633       | 759             | 706             | 93,0%            |
|              | Total                                                  | 9.864    | 100,0%          | 825       | 989             | 919             | 92,9%            |

No processo de administração do questionário verificou-se a obtenção de um número de respostas muito inferior ao esperado, com uma taxa global de respostas de 46,1% (ver anexo 1). Para este resultado contribuiu a ausência de muitos estudantes nas aulas das UC recolhidas para a amostra, acontecendo com frequência que, contrariamente ao pedido, os docentes apelavam ao preenchimento do questionário fora do tempo da aula, reduzindo-se substancialmente a motivação dos estudantes para responderem ao inquérito. A administração do questionário sem a presença de nenhum elemento da equipa do estudo não permitiu evitar essas situações. As várias insistências feitas para que os docentes pedissem a resposta aos estudantes não se traduziu num número de respostas de acordo com as expectativas.

No entanto, as 919 respostas obtidas (ver quadro 1) foram consideradas como garantindo uma representatividade ainda assim significativa, já que são superiores a uma dimensão da amostra definida com um nível de confiança de 99,7% e um erro amostral de 5%, com um total de 825 estudantes. Considerando um acrescimo de 20% a este último número de estudantes para compensar as faltas de resposta obtiveram-se taxas de resposta em cada dos Institutos Politécnicos da ordem dos 90% o que permite considerar a representatividade relativamente às duas subpopulações, mas também relativamente à população. Pelo facto de se verificar uma sobre representação das respostas em algumas escolas a representatividade por escola deve ser relativizada.

As respostas dadas pelos estudantes no inquérito por questionário foram tratadas estatisticamente, primeiro de uma forma mais descritiva e global e seguidamente procurando-se relações estatisticamente significativas entre as várias respostas e fatores como a escola, a idade, o género, o tipo de curso e o ano curricular.



## 4. Análise final de resultados

A recolha de dados sobre a participação dos estudantes nos atos eleitorais das duas instituições e nas reuniões dos órgãos de gestão permitiu-nos construir um retrato global, que se reforçou com as respostas dos estudantes ao inquérito por questionário, em que foi possível identificar a importância dada pelos estudantes à sua participação institucional, às suas características e fatores. Estes dados têm a virtualidade de nos fornecer uma leitura mais abrangente da realidade, assente na representatividade assegurada pelos processos de recolha que foram adotados – a constituição de uma amostra representativa no caso do questionário e a abrangência das informações sobre os processos eleitorais e sobre o funcionamento dos órgãos de gestão.

Com as entrevistas realizadas procurou-se recolher uma informação mais aprofundada sobre o objeto deste estudo, de modo a possibilitar a interpretação dos dados de natureza mais quantitativa, pela possibilidade de se captarem as significações atribuídas pelos estudantes entrevistados às formas e aos fatores da sua participação institucional. A recolha dos estudantes entrevistados foi realizada em função de uma diversificação dos seus perfis, procurando-se captar ao máximo as suas diferentes perspetivas sobre a participação estudantil.

Assim, posteriormente à obtenção dos resultados parciais da investigação a partir de cada uma das técnicas utilizadas, procedeu-se a uma análise cruzada tendo em vista estabelecer a validação e a complementaridade dos mesmos. Tal análise foi feita com recurso a uma tabela em que se introduziram categorias de correntes dos objetivos, no eixo horizontal, e, no eixo vertical, os resultados de cada uma das técnicas utilizadas.

A partir da tabela, deduziram-se as conclusões globais do estudo.

## **CAPÍTULO TERCEIRO**

### **ANÁLISE À INFORMAÇÃO RECOLHIDA RELATIVA A ELEIÇÕES E PARTICIPAÇÃO DOS ESTUDANTES EM REUNIÕES**

Para efeitos do trabalho preparatório do projeto de investigação “Participação dos estudantes e qualidade das instituições de ensino superior”, procede-se seguidamente à apresentação e ao resultado da análise efetuada à documentação e dados solicitados à Presidência e aos órgãos das Escolas, dos Institutos Politécnico de Portalegre e de Setúbal, relativos:

- À participação dos estudantes nos atos eleitorais, para os órgãos institucionais onde têm assento bem como nos atos eleitorais para as Associações Académicas;
- À participação dos estudantes eleitos nas reuniões dos órgãos onde têm assento.

Os resultados aqui apresentados constituíram o ponto de partida do estudo e serviram de base à discussão e planeamento pela equipa das etapas seguintes, designadamente na elaboração dos questionários e das entrevistas.

#### **1. Quadro jurídico**

De acordo com o Regime Jurídico das Instituições de Ensino Superior, Lei n.º 62/2007, de 10 de setembro, são os seguintes os órgãos das instituições de Ensino Superior Politécnico onde têm assento estudantes:

- Ao nível de cada Instituto Politécnico,
  - o Conselho Geral (art.º 81.º), composto por 15 a 35 membros, e nele têm assento, obrigatoriamente, representantes dos professores e investigadores (tendo de constituir mais de 50% dos elementos), representantes dos estudantes (tendo que constituir mais de 15% dos elementos) e personalidades externas de reconhecido mérito, não pertencentes à instituição, com conhecimentos e experiência relevantes para esta (tendo que constituir mais de 30%). Podem ainda, nos termos dos estatutos das instituições, ser incluídos como membros representantes do pessoal não docente e não investigador. Conclui-se, assim, que o grau de liberdade das instituições, na definição da composição do órgão, é muito limitado (inferior a 5%).
- Ao nível das Escolas,
  - O Conselho de Representantes (resultante do art.º 97.º), que não deve exceder 15 membros, devendo incluir pelo menos 60 % de docentes e investigadores e representantes dos estudantes e podendo incluir representantes dos trabalhadores não docentes e não investigadores, bem como entidades externas. Trata-se, igualmente, de um órgão em que é limitado o grau de liberdade das instituições quanto à participação dos estudantes (no máximo de 2, admitindo importante a participação de não docentes e de entidades externas). Refira-se, no entanto, que este órgão não existe no IPPortalegre, em virtude de terem optado pela nomeação, pelo Presidente do Instituto, do Diretor das Escolas.

- O Conselho Pedagógico (art.º 104.º), constituído por igual número de representantes do corpo docente e dos estudantes da instituição ou da escola, eleitos nos termos estabelecidos nos estatutos e em regulamento (órgão paritário).

No que se refere às Associações de Estudantes, a sua instituição é regulada pela Lei 23/2006 (Regime Jurídico do Associativismo Jovem), de 23 de junho. Nela, para além do reconhecimento jurídico das Associações Académicas e dos seus direitos e deveres, apenas são estabelecidos os limites quanto aos dirigentes associativos que podem ser reconhecidos pelas Instituições, em função do número de estudantes (art.º 23.º).

Estabelecida a composição dos órgãos, considerou-se que a participação dos estudantes pode ser aferida a dois níveis:

- na vontade da participação nos órgãos, aferida indiretamente pela taxa de participação nos processos eleitorais conducentes à escolha dos membros estudantes;
- na efetiva participação dos membros eleitos, nos órgãos, aferida pela sua presença em reuniões dos órgãos e pelas temáticas dos pontos das ordens de trabalho.

### 1.1. A aplicação do RJIES pelos Institutos

A forma adotada pelos Institutos de Portalegre e de Setúbal, na aplicação legal, embora globalmente semelhante, é distinta. Da análise dos estatutos das duas instituições (Estatutos do IPPortalegre - Despacho Normativo nº 3/2016, de 3 de maio, e Estatutos do IPSetúbal - Despacho normativo n.º 59/2008, de 6 de novembro), em vigor à data do arranque do projeto, conclui-se que:

- IPPortalegre:
  - Conselho Geral composto por 22 membros, sendo 3 estudantes (13,6%);
  - Conselho Académico, integrando o Presidente da Associação Académica (art.º 33.º);
  - Conselho Pedagógico de cada Escola, constituído por um mínimo de 6 e um máximo de 24 membros (art.º 43.º).
- IPSetúbal:
  - Conselho Geral composto por 29 membros, sendo 4 estudantes (13,8%);
  - Conselho Académico, integrando um membro estudante dos Conselhos Pedagógicos de cada unidade orgânica, eleito pelos estudantes que integram os órgãos e um representante das Associações de Estudantes das unidades orgânicas de ensino e investigação (art.º 27.º);
  - Conselho de Representantes de cada Escola, integrando três representantes dos estudantes (art.º 40.º);
  - Conselho Pedagógico de cada Escola, constituído por igual número de docentes e estudantes (sendo as Escolas que estabelecem o seu número de membros (art.º 49.º).

Apesar da lei referir que o Conselho Geral dos Institutos deve integrar pelo menos 15% de estudantes, a opção de ambos os institutos foi pela adoção de um número de estudantes ligeiramente inferior.

Na análise que seguidamente se desenvolve relativamente à participação dos estudantes, quer nos atos eleitorais, quer nas reuniões dos órgãos, optou-se por não

inquirir informação relativa aos Conselhos Académicos de ambas as instituições, em virtude de os estudantes que nele têm assento não serem sujeitos a um processo eleitoral: no caso do IPPortalegre, a participação fica a cargo, por inerência, do Presidente da Associação Académica; no IPSetúbal, além do representante da Associação Académica, é escolhido um estudante representante de cada Escola, de entre os eleitos para o Conselho Pedagógico.

## 1.2. Outras formas de participação dos estudantes

Embora da análise dos Estatutos dos Institutos Politécnicos, em vigor à data de início do presente estudo, não sejam referidas outras formas de participação dos estudantes nas suas atividades, elas existem e apresentam-se como mais uma importante faceta do papel dos estudantes na regulação das decisões que os afetam. Deles são de destacar:

- A participação de estudantes no Conselho de Ação Social (dois estudantes, indicados pela Associação de Estudantes, sendo um deles bolseiro e outro não bolseiro, no IPSetúbal e no IPPortalegre);
- A integração de um estudante, designado pela Associação de Estudantes, na Unidade de Coordenação do Sistema Integrado de Gestão e Garantia da Qualidade, do IPSetúbal e no Conselho Estratégico para a Avaliação da Qualidade, no IPPortalegre. No IPPortalegre, a Bolsa de Auditores também inclui estudantes;
- A integração das Estruturas Locais da Qualidade das Escolas, do IPSetúbal e do SAS, de um estudante designado pela Associação de Estudantes, no IPSetúbal. No IPPortalegre, essa participação faz-se nos Grupos de Melhoria Contínua Para o Ensino e Formação e Investigação, Inovação e Desenvolvimento, ao nível do Instituto;
- A participação de estudantes, como representantes dos cursos ou de cada ano, junto das Coordenações de Curso, no IPSetúbal, não existindo essa figura no IPPortalegre.

## 2. Atos eleitorais

Efetuada o levantamento dos órgãos existentes nas duas instituições, onde os estudantes têm direito, estatutariamente, a participar, procedeu-se, de seguida, à análise dos atos eleitorais associados à eleição de estudantes para esses órgãos. Refira-se que, para efeitos da análise, se considerou como referência o intervalo de tempo entre 2015 e 2020 (5 anos), tendo-se procedido à recolha da informação relacionada com os atos eleitorais decorridos nesse período.

Importa salientar que o IPSetúbal é composto por 5 Escolas: Escola Superior de Tecnologia de Setúbal (ESTS), Escola Superior de Educação (ESE), Escola Superior de Ciências Empresariais (ESCE), Escola Superior de Tecnologia do Barreiro (ESTB) e Escola Superior de Saúde (ESS). Como referido anteriormente, para além do Conselho Geral (CG) do Instituto, houve necessidade de recolher informação relativa aos dois órgãos de cada Escola onde os estudantes têm assento: o Conselho de Representantes (CR) e o Conselho Pedagógico (CP).

O IPPortalegre é composto por 4 Escolas: Escola Superior Agrária de Elvas (ESAE), Escola Superior de Educação e Ciências Sociais (ESECS), Escola Superior de Tecnologia e Gestão (ESTG) e Escola Superior de Saúde (ESS). Para além do

Conselho Geral (CG) do Instituto, em cada Escola existe apenas um órgão onde os estudantes têm assento: o Conselho Pedagógico (CP).

## 2.1. Universos eleitorais

Da análise da informação recolhida, sendo diversos os atos eleitorais realizados, considerou-se importante apresentar uma estimativa média dos eleitores, nos diferentes universos eleitorais, no decorso dos 5 anos em análise, cujos valores se apresentam no quadro 3.

**Quadro S3 – Número médio de eleitores, entre 2015 e 2020, nos diferentes universos eleitorais do IPSetúbal e do IPPortalegre.**

| Instituto    | Universo | Média de eleitores |
|--------------|----------|--------------------|
| IPSetúbal    | Global   | 5990               |
|              | ESTS     | 1864               |
|              | ESE      | 760                |
|              | ESCE     | 2036               |
|              | ESTB     | 464                |
|              | ESS      | 830                |
| IPPortalegre | Global   | 1446               |
|              | ESECS    | 485                |
|              | ESTG     | 579                |
|              | ESAE     | 319                |
|              | ESS      | 306                |

Importa ter em atenção que, no levantamento efetuado, algumas eleições da mesma instituição, apesar de realizadas no mesmo ano civil e abrangendo o mesmo universo de estudantes, ocorreram em anos letivos diferentes, o que justifica as significativas diferenças no número de eleitores detetadas.

## 2.2. Órgãos IPSetúbal e IPPortalegre

São dois os atos eleitorais que envolvem toda a comunidade de estudantes de ambos os institutos: as eleições para o Conselho Geral (CGeral) e para a Associação de Estudantes (AAIPS e AAIPP). No quadro 4 apresenta-se a listagem das eleições realizadas no período em análise (2015 a 2020), no IPSetúbal, sendo apresentada a dimensão do corpo eleitoral, o número de estudantes votantes e a percentagem de participação. Na figura 2 apresentam-se, graficamente, as taxas de participação. No quadro 4a e na figura 3 apresentam-se os resultados relativos ao IPPortalegre.

**Quadro S4 – Participação nas eleições do IPSetúbal**

| Órgão  | Ano  | Eleitores | Votantes | % Votantes |
|--------|------|-----------|----------|------------|
| CGeral | 2015 | 5824      | 335      | 5,8%       |
| AAIPS  | 2015 | 6128      | 289      | 4,7%       |
| AAIPS  | 2016 | 5502      | 532      | 9,7%       |
| CGeral | 2017 | 6629      | 302      | 4,6%       |
| AAIPS  | 2017 | 5446      | 486      | 8,9%       |
| AAIPS  | 2018 | 6078      | 447      | 7,4%       |
| AAIPS  | 2019 | 6321      | 395      | 6,2%       |

**Figura S2 – Taxas de participação nas eleições do IPSetúbal**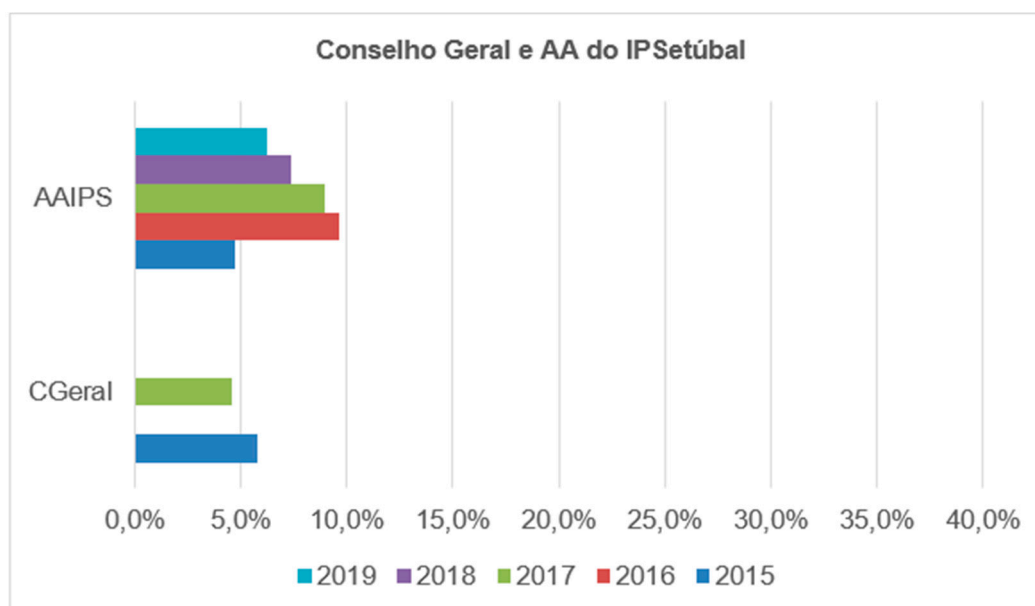**Quadro S4a – Participação nas eleições do IPPortalegre**

| Órgão  | Ano  | Eleitores | Votantes | % Votantes |
|--------|------|-----------|----------|------------|
| CGeral | 2015 | 1397      | 513      | 37%        |
| AAIPP  | 2015 |           |          |            |
| AAIPP  | 2016 |           |          |            |
| AAIPP  | 2017 |           |          |            |
| AAIPP  | 2018 | 1687      | 592      | 35%        |
| CGeral | 2019 | 1032      | 344      | 33,3%      |
| AAIPP  | 2019 | 1666      | 392      | 24%        |

Figura S3 – Taxas de participação nas eleições do IPPortalegre

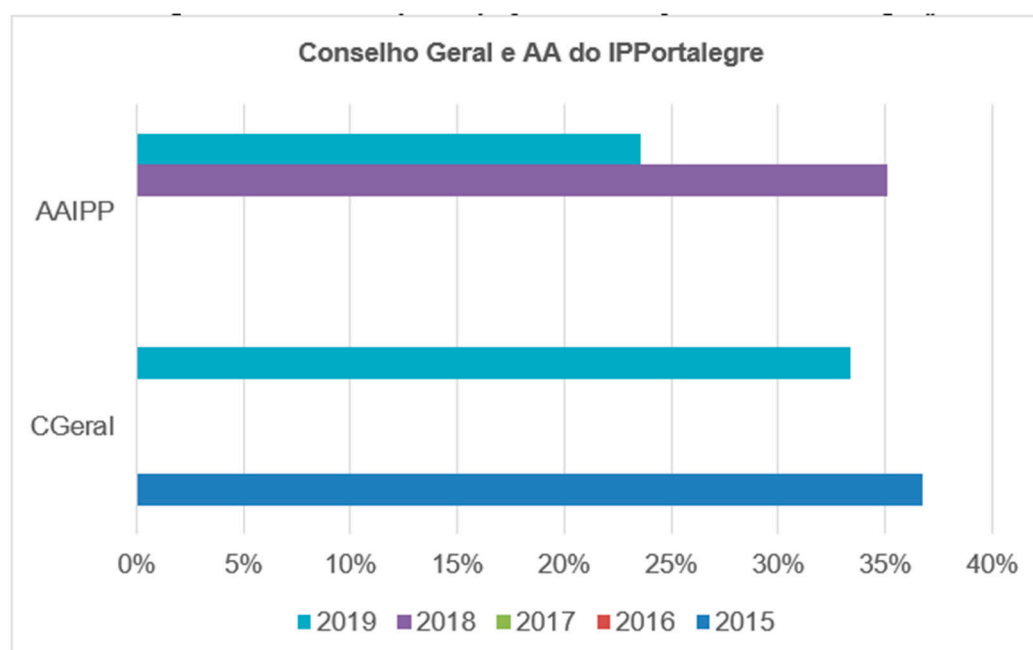

A análise da informação recolhida mostra que:

- É muito pequena a participação de estudantes nos atos eleitorais que abrangem todo o universo de estudantes IPSetúbal (máximo de 9,7% votantes), ao contrário das eleições do IPPortalegre;
- A participação variou entre 4,6% e 9,7% no IPSetúbal e entre 24% e 37% no IPPortalegre;
- No IPSetúbal os atos eleitorais para a Associação são (à exceção do ocorrido em 2015) mais participados do que os para o Conselho Geral, não se constatando essa diferença no IPPortalegre.

## 2.3. Órgãos das Escolas

No IPSetúbal, são dois os atos eleitorais que envolvem a comunidade de estudantes de todas as Escolas: o Conselho de Representantes (CR) e o Conselho Pedagógico (CP). No IPPortalegre, os atos eleitorais restringem-se ao Conselho Pedagógico (CP).

Apresentam-se, seguidamente, os resultados comparativos das eleições, realizadas em cada Escola, no período entre 2015 e 2019. Optou-se pela apresentação separada para os Conselhos de Representantes e para os Conselhos Pedagógicos.

Relativamente à informação recolhida, não foi possível obter os resultados de todos os atos eleitorais, que não está disponível nos portais das escolas e mesmo após diversas diligências, essa recolha não foi possível.

### 2.3.1. CONSELHOS DE REPRESENTANTES DAS ESCOLAS DO IPSETÚBAL

A participação nas eleições para os Conselhos de Representantes das Escolas do IPSetúbal encontra-se representada na figura seguinte. Nela é apresentada, para cada Escola/Ano da Eleição, a percentagem de estudantes, tendo por base o universo eleitoral, que votaram para o Conselho de Representantes.

**Figura S4: Percentagem de estudantes votantes em cada Escola/Ano de Eleição, para os diferentes Conselhos de Representantes das Escolas do IPSetúbal.**

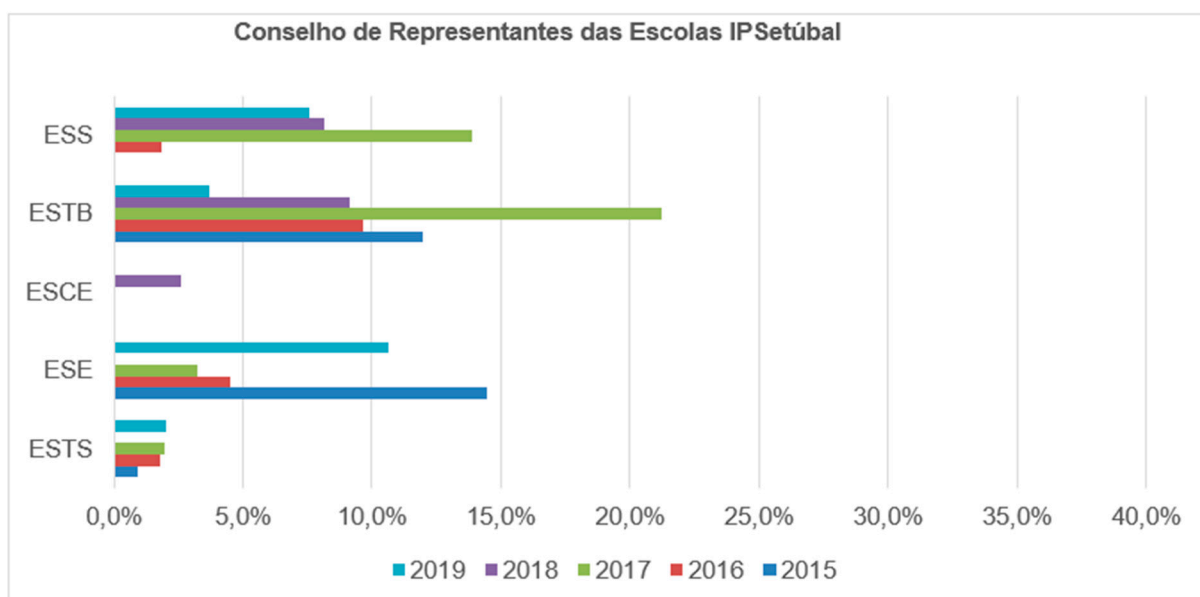

Da análise da figura é possível concluir:

- São as Escolas de menor dimensão do IPSetúbal (ESS, ESTB e ESE) que apresentam maiores taxas de participação.
- As taxas de participação eleitoral, nestas escolas, são, em geral, superiores às taxas relativas aos órgãos do IPSetúbal;
- Nas Escolas de maior dimensão as taxas de participação são quase residuais (inferiores a 3%).

### **2.3.2. CONSELHOS PEDAGÓGICOS DO IPSETÚBAL E DO IPPORTALEGRE**

A participação nas eleições para os Conselhos Pedagógicos de ambos os Institutos, encontra-se representada nas figuras seguintes.



**Figura S5: Percentagem de estudantes votantes em cada Escola/Ano de Eleição, para os diferentes Conselhos Pedagógicos das Escolas do IPSetúbal.**

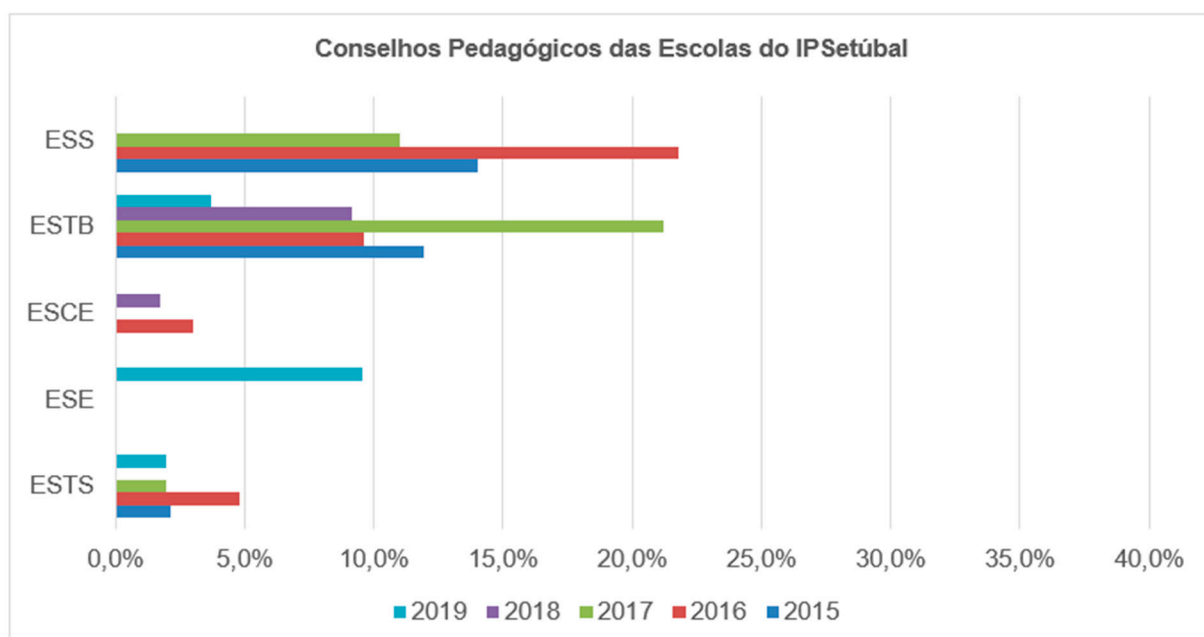

**Figura S6: Percentagem de estudantes votantes em cada Escola/Ano de Eleição, para os diferentes Conselhos Pedagógicos das Escolas do IPPortalegre.**

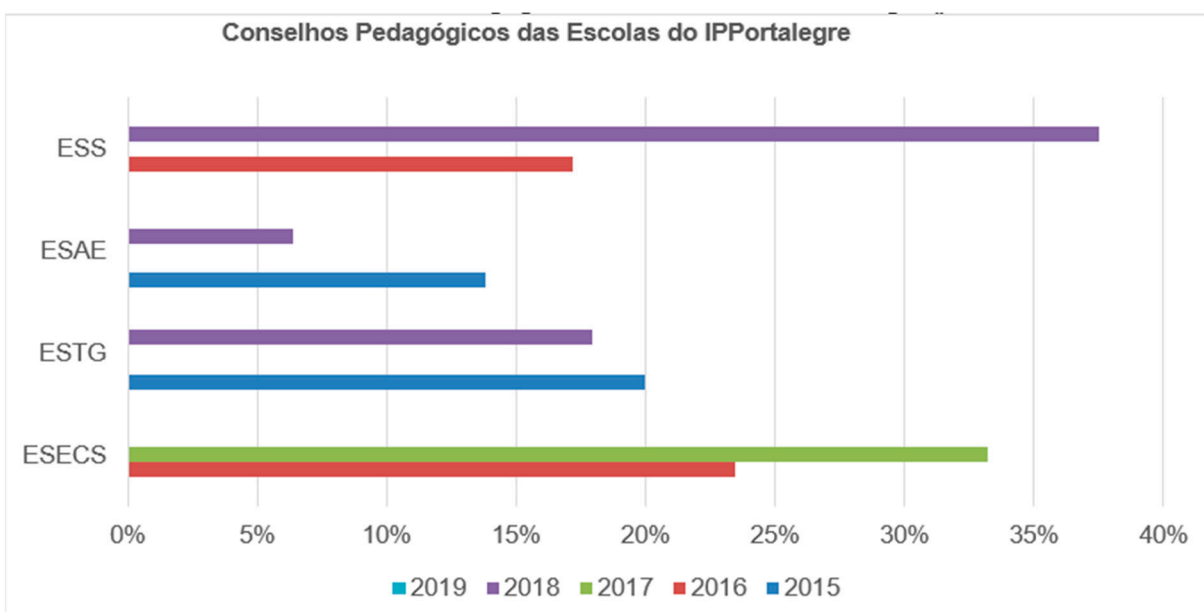

Da análise destes últimos gráficos é possível concluir:

- As maiores taxas de participação ocorrem no IPPortalegre;
- No IPSetúbal, são as Escolas de menor dimensão (ESS, ESTB e ESE) que apresentam maiores taxas de participação, verificando-se o oposto no IPPortalegre;
- As taxas de participação eleitoral, nestas escolas, são, em geral, superiores às taxas relativas aos órgãos IPSetúbal;
- Nas Escolas de maior dimensão do IPSetúbal as taxas de participação são reduzidas (inferiores a 5%).

### 3. Reuniões dos Órgãos IP e das Escolas, que envolvem estudantes

Outra vertente do estudo debruçou-se sobre a participação dos estudantes nas reuniões realizadas num ano específico (escolheu-se o ano 2019 por ser o ano completo mais recente, à data da recolha). Apresentam-se a seguir os resultados da análise dos dados recolhidos.

#### 3.1. Participação dos estudantes em reuniões

No quadro seguinte apresenta-se, para cada órgão, o número de estudantes com assento no órgão, o número de reuniões realizadas em 2019, a média de estudantes presentes nas reuniões (tendo por base o número de estudantes com assento no órgão) e a taxa a que essa média conduz (tendo por base o número de reuniões realizadas).

**Quadro S5 – Número de estudantes com assento nos diferentes órgãos, número de reuniões realizadas em 2019 e percentagem média de estudantes participantes nas reuniões do IPSetúbal**

| Órgão   | N. Est | Nº Reuniões | Med_Est | %   |
|---------|--------|-------------|---------|-----|
| CG      | 4      | 5           | 1,8     | 45% |
| CR_ESTS | 3      | 6           | 1,6     | 53% |
| CP_ESTS | 8      | 23          | 2,8     | 35% |
| CR_ESE  | 3      | 3           | 1,6     | 53% |
| CP_ESE  | 12     | 2           | 7,5     | 63% |
| CR_ESCE | 3      | 5           | 1,6     | 53% |
| CP_ESCE | 12     | 4           | 9,25    | 77% |
| CR_ESTB | 3      | 11          | 1,6     | 53% |
| CP_ESTB | 5      | 11          | 2       | 40% |
| CR_ESS  | 3      | 3           | 1,6     | 53% |
| CP_ESS  | 7      | 10          | 4,2     | 60% |

**Quadro S6– Número de estudantes com assento nos diferentes órgãos, número de reuniões realizadas em 2019 e percentagem média de estudantes participantes nas reuniões do IPPortalegre.**

| Órgão    | N. Est | Nº Reuniões | Med_Est | %   |
|----------|--------|-------------|---------|-----|
| CG       | 3      | 3           | 1       | 33% |
| CP_ESECS | 8      | 13          | 2,75    | 34% |
| CP_ESTG  | 8      | 5           | 2,4     | 30% |
| CP_ESAE  | 8      | 6           | 5       | 63% |
| CP_ESS   | 6      | 13          | 4,5     | 75% |

Na figura seguinte apresenta-se a participação dos estudantes nas reuniões de cada um dos órgãos, sendo a percentagem dada pela relação entre o número de participações efetivamente ocorrido em todas as reuniões de cada órgão e o número

teórico possível de participações (produto do número de membros estudantes pelo número de reuniões).

**Figura S7: Percentagem de estudantes participantes nas reuniões dos diferentes órgãos das Escolas (Conselho de Representantes e Conselho Pedagógico) e do IPSetúbal (Conselho Geral)**

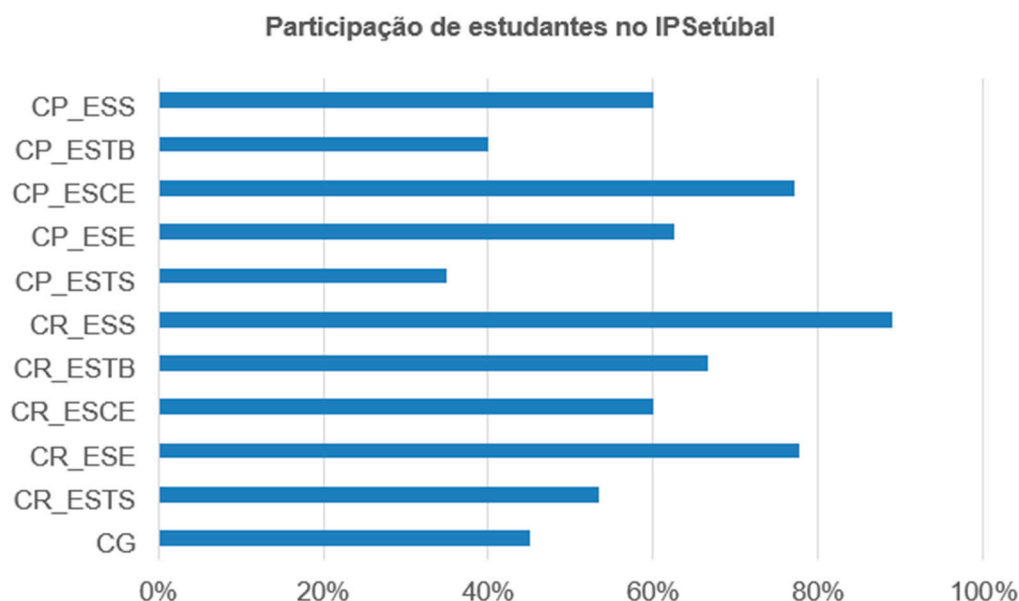

**Figura S8: Percentagem de estudantes participantes nas reuniões dos diferentes órgãos das Escolas (Conselho Pedagógico) e do IPPortalegre (Conselho Geral)**

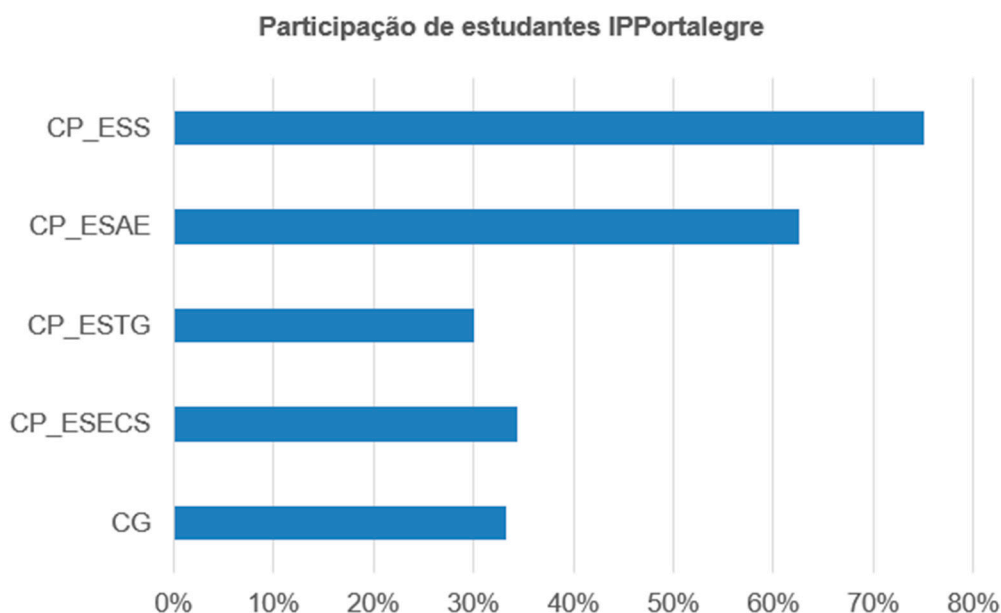

Da análise das figuras, destaca-se:

- As participações nas reuniões dos órgãos são significativas (taxas entre os 35% e os 89%, no IPSetúbal, e entre os 30% e os 75%, no IPPortalegre);
- No IPSetúbal, o Conselho Pedagógico da ESCE foi aquele que apresentou a maior taxa de participação e o da ESTS o que apresentou a menor taxa;
- No IPPortalegre, o Conselho Pedagógico da ESS foi aquele que apresentou a maior taxa de participação e o da ESTG o que apresentou a menor taxa;

- É enorme a variação do número de reuniões havidas nas diferentes escolas do IPSetúbal: entre 2 e 23, no caso do CP; entre 3 e 11, no caso do CR. Essa diferença também existe no IPPortalegre, mas é menos acentuada: entre 5 e 13 no caso dos CP.
- Na ESE do IPSetúbal, além das reuniões plenárias, houve 7 reuniões da “Comissão Permanente”;
- Foi na ESTS do IPSetúbal que aconteceram mais reuniões (23) e, simultaneamente, menor participação (35%);
- No Conselho Pedagógico da ESTS do IPSetúbal, não se verificou quórum em 9 das 23 reuniões (39%);
- Na ESE, na ESCE e na ESS, do IPSetúbal, a taxa de participação nos Conselhos Pedagógicos é superior à taxa de participação nos Conselhos de Representantes, invertendo-se essa relação na ESTS e na ESTB.
- A participação média global nos Conselhos de Representantes das Escolas do IPSetúbal foi de 53% e nos Conselhos Pedagógicos de 55%, valores muito semelhantes.

### 3.2. Assuntos em discussão

A finalizar, procedeu-se a uma análise aos assuntos discutidos nas ordens de trabalhos, tendo os mesmos sido classificados em três categorias:

- Pedagógicos (afetando a atividade letiva dos estudantes: inquéritos pedagógicos, calendários letivos e de exames, etc);
- Relativos aos estudantes (afetando o relacionamento do estudante com o IP: regulamentos, etc);
- Relativos ao IP (referentes à instituição: relatórios de atividade, planos de atividade, etc).

Nesta análise foram excluídos os assuntos como aprovações de atas, informações, etc.

Na tabela seguinte apresenta-se a distribuição dos assuntos pelas categorias referidas.

**Quadro S7 – Distribuição dos assuntos abordados nas reuniões dos órgãos do IPSetúbal por área e número médio de estudantes presentes nas reuniões**

|         | Total de Assuntos | N.º Assuntos Pedagógicos | N.º Assuntos Estudantes | N.º Assuntos IPGeral | Med_Est |
|---------|-------------------|--------------------------|-------------------------|----------------------|---------|
| CG      | 15                | 0                        | 3                       | 12                   | 1,8     |
| CR_ESTS | 6                 | 0                        | 0                       | 6                    | 1,6     |
| CR_ESE  | 5                 | 0                        | 0                       | 5                    | 1,6     |
| CR_ESCE | 6                 | 0                        | 0                       | 6                    | 1,6     |
| CR_ESTB | 18                | 0                        | 0                       | 18                   | 1,6     |
| CR_ESS  | 5                 | 0                        | 0                       | 5                    | 1,6     |
| CP_ESTS | 76                | 67                       | 6                       | 3                    | 2,8     |
| CP_ESE  | 11                | 10                       | 1                       | 0                    | 7,5     |
| CP_ESCE | 21                | 14                       | 3                       | 4                    | 9,3     |
| CP_ESTB | 50                | 37                       | 2                       | 11                   | 2,0     |
| CP_ESS  | 51                | 35                       | 3                       | 13                   | 4,2     |
| TOTAL   | 264               | 163 (62%)                | 18 (7%)                 | 83 (31%)             | -       |

**Quadro S8 – Análise dos assuntos abordados nas reuniões dos órgãos do IPPortalegre, sua distribuição por área e número médio de estudantes presentes nas reuniões**

|          | Total de Assuntos | N.º Assuntos Pedagógicos | N.º Assuntos Estudantes | N.º Assuntos IPGeral | Med_Est |
|----------|-------------------|--------------------------|-------------------------|----------------------|---------|
| CG       | 14                | 0                        | 0                       | 14                   | 1,0     |
| CP_ESECS | 13                | 1                        | 4                       | 8                    | 2,8     |
| CP_ESTG  | 15                | 12                       | 0                       | 2                    | 2,4     |
| CP_ESAE  | 31                | 12                       | 3                       | 16                   | 5,0     |
| CP_ESS   | 8                 | 1                        | 0                       | 7                    | 4,5     |
|          | 81                | 26 (32%)                 | 7 (9%)                  | 47 (58%)             | -       |

No IPSetúbal a maioria dos assuntos (62%) afeta direta ou indiretamente a vida académica dos estudantes, considerando-se importante a sua participação na discussão. Já no IPPortalegre a maioria dos assuntos é de índole institucional. Outra conclusão é que, da generalidade dos assuntos abordados nos órgãos de carácter geral (Conselho Geral e de Representantes), são poucos os que afetam diretamente a vida dos estudantes. No entanto, não parece haver relação entre esta diferença e a participação dos estudantes nas reuniões.

## 4. Questões a considerar

Depois de se ter procedido ao levantamento de toda a informação relativa à participação dos estudantes nos órgãos dos Institutos Politécnicos de Portalegre e de Setúbal, quer em termos da representatividade que a lei e os estatutos lhe conferem, quer em termos da sua participação ativa, através da análise dos atos eleitorais, a informação recolhida permitiu, por um lado, compreender a situação dos Institutos em análise, no intervalo de tempo estabelecido, e a sua análise deu origem a um conjunto significativo de questões (cujo documento síntese se apresenta em anexo) que vieram

a constituir a base das etapas seguintes do projeto: os inquéritos por questionário e os inquéritos por entrevista.

Delas, convém salientar, nesta fase:

- A diferente percentagem de participação dos estudantes do IPSetúbal e do IPPortalegre nos atos eleitorais para os órgãos e a também significativa diferença entre votantes para os diferentes órgãos dos mesmos institutos. Estes resultados motivaram diversas questões associadas às eleições, nomeadamente quanto a:
  - Modos de divulgação e realização dos atos eleitorais;
  - Processos de constituição de listas;
  - Consistência da importância do papel e dos assuntos abordados nos órgãos;
- Outras questões:
  - Em que medida as temáticas das reuniões dos órgãos são percecionadas com interesse pelos estudantes?
  - Até que ponto a intervenção dos estudantes é percebida como relevante e integrada na tomada de decisão institucional?
  - Que fatores intervêm na decisão dos estudantes em participar?

## **CAPÍTULO QUARTO**

### **PERFIS PESSOAIS, RELAÇÃO COM OS PARES E COM A INSTITUIÇÃO – AS ENTREVISTAS**

#### **Introdução (a acrescentar)**

### **1. Conhecimento do modelo de gestão das instituições de ensino superior politécnico e das hipóteses de participação dos estudantes nele contidas**

#### **1.1. A Participação dos estudantes**

Relativamente à participação, de salientar que quando no estudo esta se encontra na análise da participação nos atos eleitorais e na assunção pelos estudantes de cargos institucionais nos órgãos de gestão se está a assumir, à partida, a relevância deste tipo de participação institucional face a outras, cuja natureza é mais informal. Uma das estudantes “sem cargos” chama a atenção para esse aspeto: Eu acho que se tivesse um problema com um professor eu ia diretamente falar com o meu diretor do curso. Eu acho que seria a primeira pessoa que eu ia falar. (BB)

De facto, nas instituições de ensino superior de pequena e média dimensão, os círculos de comunicação têm por vezes uma vertente relacional direta, um diálogo mais próximo entre todos, o que parece influenciar de algum modo a perspetiva dos estudantes sobre a relevância dos órgãos institucionais e sobre o papel que os estudantes aí assumem. Assim, o argumento de JP é em certa medida semelhante ao de BB:

Eu senti que o diretor foi uma pessoa (...) bastante acessível e muito preocupada com os seus alunos, se está insuportável se não está insuportável, precisa de ajuda... o que é que eu posso esboçar (...), ligou mesmo para mim! (quando teve um problema). portanto tanto os professores como diretor eu senti que me ouviram (JP)

Adresse ainda que os estudantes, tanto em Setúbal como em Portalegre, relatam formas de participação que não aprofundámos neste estudo, tais como a participação em projetos institucionais (Eco Escolas, por exemplo), em projetos de investigação, em iniciativas do IP (semanas abertas, por exemplo) e ou dinâmicas de curso e/ou de unidades curriculares (ou mesmo individuais) junto da comunidade (campanhas solidárias, apoio a instituições comunitárias), tal como testemunha IS:

Depois, no Ensino Superior, é que acabei por alargar mais os meus horizontes a esta participação e, se falar, foi a Carteira de Competências que ajudou porque participei nas Brigadas Universitárias de Intervenção (BUI)...depois pelo curso também, acabei também por ingressar, fomos dar aquelas aulas aos estudantes (nas BUI), portanto acho que foi a partir daí que começou a criar-se aqui este “bichinho da participação”, mas ainda a nível mais pessoal. (IS)

Eu parti pei s  em organiza  o mesmo de eventos, n  sei se isso   relevante ou n o. Fui assistente de produ  o na festa mundial da anima  o quando foi    em Portalegre...(JP)

## 1.2. Participa  o nos atos eleitorais

Em rela  o   participa  o nos atos eleitorais, os estudantes  om  argos institucionais participa  am em geral em todas as elei  es, enquanto os estudantes sem  argos institucionais assumem que em muitos deles n o foram votar. Quando  onfrontados  om a baixa taxa de participa  o quer no IP de Set bal, quer no de Portalegre, mas bastante mais baixa no de Set bal, tendem a  omentar sobretudo o IP que  onhe em. As raz es apontadas foram, na perspetiva dos estudantes, sem as  onseguirmos hierarquizar por ordem de import ncia, as seguintes: a) a exist ncia, em regra, de uma lista  nica para os  rg os; b) a falta de  omunica  o entre os estudantes que est o nos  rg os e os outros estudantes; c) a inefic cia da informa  o institucional e d) falta de  ultura demo r tica.

Relativamente  s listas  nicas,   raro que tanto num IP  omo no outro, assim  omo nas respetivas UO, os estudantes  onsigam organizar mais do que uma lista para os v rios  rg os institucionais. Frequentemente a lista   apresentada j  muito perto do ato eleitoral e sem nada que permita distinguir as ideias defendidas ou quem s o os rostos asso ados aos nomes apresentados, o que na perspetiva de alguns dos entrevistados   fator de desinteresse.

E nota-se uma grande diferen a, n vel da asso ia  o o que eu senti foi que tamb m houve, nas  ltimas elei  es em que parti pei, um n vel de absten  o bastante elevada. Tem vindo aumentar o n vel da absten  o. Aqui a n vel da asso ia  o, at  pode haver v rios fatores, nomeadamente o facto de s  haver uma lista  nica,   aquela lista que vai acabar por ganhar alguma das formas...(JPC)

Contudo, apesar do que diz JPC, v rios outros estudantes assinalam que a  ampanha para a Asso ia  o Acad mica  , ainda assim, a que revela maior dinamismo e aquela em que   mais frequente haver mais do que uma lista e apresenta  o das ideias e dos protagonistas. Ainda assim, quer em rela  o   Asso ia  o Acad mica, quer aos estudantes representados nos  rg os, parece haver da parte dos estudantes “sem  argos”, a ideia de que h  um “fe amento” que raramente permite que entre “gente nova”, fun ionando-se muito por  onvites e  onhecimento pr vio entre amigos.

Sin eramente porque nunca me senti muito a olhida, mesmo quando tentei falar  om alguns dos  rg os, por exemplo houve um ano, eu a ho que foi h  2 anos... ou este ano... que na escola se  riaram os n cleos (de  urso) e sempre que eu queria  onsultar os n cleos era muito restrito... parecia um grupinho muito fe hado e a asso ia  o acad mica, no ano em que eu entrei, ainda estava muito ligada    omiss o de praxes, foi uma  oisa que eu n o quis de todo envolver-me (JP)

(...) A ho que agora est  diferente, mas eu n o via isso nos meus primeiros anos de fac uldade  om uma oportunidade aberta a todos. (AC)

Quanto   informa  o institucional, quer atrav s das sess es organizadas no in cio do ano letivo para explicar  omo fun ionam as institui  es do ensino superior, quer a que   remetida por via digital (*mail*) tem reduzido impacto. BS refere: A gente recebe tanta  oisa [por email], de tantas  oisas diferentes e h 



tantas que não interessam, chega a ser maçante a quantidade de e-mails para ler. (BS)

Persistem assim questões relativas à informação que por resolver, como se depreende dos testemunhos de AC e IS:

Eu própria teria participado se tivesse tido essa oportunidade, mas acho que as eleições para o Conselho Pedagógico são feitas de 2 em 2 anos e têm critérios específicos para quem pode entrar. Eu lembro-me que no nosso ano, nós não podíamos entrar, não tenho a certeza porque não era ano de eleição. Entretanto depois não me explicaram muito bem como é que se podia entrar para o Conselho Pedagógico e eu achei por não participar (AC)

Porque além de estar ali naquele lugar do lado esquerdo da escola que é onde poucas pessoas passam, tinha sido enviado para o meu mail de estudante... vale o que vale é verdade, o mail de estudante devia ser uma fonte que todos deviam consultar, mas nós sabemos que não acontece! (IS)

Há obviamente também questões mais gerais que se prendem com a experiência de participação democrática dos estudantes, com o meio em que estão inseridos e até com a cultura local, como referem estes dois deles, o primeiro focando um aspeto positivo e o segundo um aspeto negativo:

Ora a questão da associação académica eu acho que até porque aqui em Portalegre e parece que existe uma cultura uma, vivência dos grêmios estudantis, associações no (ensino) secundário muito fortes. Eu acho que um os alunos levam bastante a sério a associação académica, os núcleos e cursos...(RP)

E na altura, ainda não estávamos no período pandémico, até incentivei bastante os colegas a virem votar e acabou por ajudar um pouco a irem votar. Mas em massa, há um grande nível de abstenção, porque as pessoas acabam por não querer, não estão muito interessadas ou então também por razões genéricas, não estão muito motivadas para o dever democrático (JPC)

### 1.3. Participação nos órgãos institucionais

Os motivos para não participar nos atos eleitorais já foram referidos, não há muito a acrescentar. Já relativamente aos motivos para participar ou não nos órgãos institucionais acrescentem razões ainda não focadas no ponto anterior. Em relação aos motivos invocados para não fazer parte destes órgãos, há uma visão dos próprios relativamente ao assunto, assim como há uma perspetiva por parte de quem participa e que se posiciona em relação a esses colegas.

Relativamente aos estudantes que assumem não ter tido esse interesse, já atrás salientamos o modo como a informação não lhes chegou ou não foi apelativa, assim como tendem a considerar que aqueles fóruns já estão, à partida, tomados por outros estudantes interessados. No entanto, o principal motivo, e esse é referido tanto pelos estudantes com cargos institucionais, como por aqueles que não têm, é a preferência por se focarem no curso no qual ingressaram, temendo que este tipo de funções lhes roube muito tempo, como referem estes dois estudantes, a primeira sem cargo institucional e o segundo com cargo:

Supostamente, este ano, aliás o ano passado, antes da pandemia, tinha sido convocada e até fui à entrevista para a participação na associação académica,

só que, por outros motivos, deídi não ingressar porque ahei que não ia ter tempo de conseguir oniliar as coisas.” (AC)

Dos meus colegas aí está sinto que era apenas um grupo muito espeífió de pessoas... muitos deles estavam lá só para aulas, trabalhos...vamos tirar uma liénatura e vamos embora...(GD)

Esta oniliação é um aspeto muito importante pois há uma representação soial muito forte entre os estudantes de que quem assume argos institucionais irá inevitavelmente prolongar a estadia na fauldade, não onduindo o curso no número de anos esperado. Os estudantes om argos institucionais problematizam, contudo, esta ideia de forma diferente, já que uns onordam om ela e outros onsideram-na apenas um estereótipo.

As outras pessoas aabam por se desleixar, têm menos atividades, aabam por deixar sempre as coisas um pouco para a última e no fim de ontas...aabei por ter melhores resultados que ertas colegas que só tinham as atividades académiás para desempenhar (JPC).

A imagem era a dos dirigentes que estão lá há 10 anos e que não fazem mais nada da vida, portanto quem for para lá vai aabar assim! Eu ouvi isto, não me foi ontado...(IS)

(...) é impossível, na minha opinião, ser um dirigente assoiativo a 100% e um estudante a 100%. Aho que não, não é possível. (JPP)

De salientar ainda que os estudantes que não assumem argos institucionais tendem a ter uma representação desses colegas, sobretudo dos da Assoiação Académica, como filiados em organizações de natureza partidária, não distinguindo om clareza o que é “político” daquilo que é “partidário”. Alguns dos testemunhos denotam isso mesmo:

(...) a forma como ele fala é tão politizada para mim que eu não onsigo, eu gosto das coisas assim direitinhas e eu aho que às vezes isso é apaz de perder muita gente pelo aminho (...) esse tipo de linguagem ria uma barreira e uma elevação da pessoa...(pensas) eu não sei falar desta forma tão eloquente (...) estás mais abaixo. E eu sinto que ria essa barreira (JP)

(...) nós vemos as juventudes partidárias sempre om grande interesse em conseguir oloar sempre alguém nas direções, para conseguir ter esse domínio (...) e aaba sempre por ali existir algum fluxo de interesse das próprias parerías (TC).

Quando tentamos perceber se a experiênía anterior de partiipação como estudantes do ensino seundário influénia a assunção de argos institucionais no ensino superior, percebe-se que quem já o fez antes se sente mais onfortável, mas que esse fator não é propriamente um impedimento, pois há estudantes que não tendo tido antes qualquer partiipação anterior, o fazem no ensino superior. Os dois testemunhos seguintes são prova disso:

(...) eu já fui responsável por muitos grupos e já vinha das assoiações de estudantes da escola seundária e das escolas básicas. E depois, basicamente foi entrar no esquema, por empurrão na altura através da praxe, onheía o Presidente da Assoiação Académica e depois foi fruto do meu trabalho, porque entraram mais 4 ou 5 om omigo e não, se alhar não tiveram esse interesse. (JPP)

eu nunca tinha tido muita experiência no que dizia parte a órgãos de gestão pedagógica das escolas (...) antes de entrar para a faculdade eu nunca [es]tive em nenhum, nunca fiz parte de uma associação de estudantes (GD)

Em síntese pode concluir-se que os estudantes que participam nos órgãos institucionais também participam nos atos eleitorais e vice-versa e que o nível de informação que obtém é importante para os impulsionar, sendo sobretudo relevante o papel dos pares.

## 2. Experiências de participação

### 2.1. Motivos para participar/não participar nos órgãos institucionais

A maior parte dos estudantes que participa nos órgãos institucionais assegura que o seu interesse é o de representar os colegas, de fazer com que a “voz dos estudantes” seja ouvida nas instituições. Acresce a esse motivo a consciência de que isso lhes permitirá alargar as suas competências, interesses e até horizontes socio-culturais, pelo que podemos afirmar que há um misto de consciência cívica e de interesse pessoal. Quanto às razões para não assumir tais cargos, já em parte as invocamos no ponto anterior, sendo que a necessidade de se focar no curso, aspeto bastante incentivado pelas famílias, parece ser a principal razão. De salientar que esta é ainda mais importante quando o estudante tem outras dificuldades adicionais como a de ter também que trabalhar ou morar longe do local em que estuda, tal como é referido por estes dois estudantes:

(...) O meu pai a minha mãe diziam assim: (...) - antes de tu ires para a escola, lembra-te que és um estudante, tens que tirar boas notas e depois é ir trabalhar e é só isto que muitos dos pais dizem.... (AF)

Demorava mais ou menos 2 horas a ir e 2 horas a vir, eu comecei a pensar se realmente eu queria gastar meu tempo ali, porque depois se eu saísse da faculdade às 6 da tarde estava em casa às 8 e depois ainda havia dias em que eles tinham reuniões e eu comecei a pensar e acabei por não me candidatar. (BB)

Em síntese, se a falta de participação nos atos eleitorais e nos órgãos parece resultar de algum desinteresse em matéria cívica e da falta de informação relativa aos órgãos, há também outros fatores que se prendem mais com dificuldades de natureza pessoal/institucional relativas às condições dos estudantes de ensino superior na realização dos cursos (acumulação com trabalho, transportes, horários...), a que acresce alguma falta de conhecimento formal/institucional de quem assume tais funções, não só por parte dos responsáveis institucionais mas também dos próprios colegas.

### 2.2. Acesso à Informação

Os estudantes com cargos institucionais revelam estar bem informados sobre os órgãos de gestão dos Institutos Politécnicos, sobretudo em relação aqueles em que têm participação institucional. Assim, em relação às UO, não mencionam por sua iniciativa órgãos como o Conselho Técnico Científico nem a Direção, sendo também em relação ao primeiro que apresentam maior desconhecimento. Conhecem bem o Conselho Pedagógico, sendo este o órgão que mais mencionam, mas também o

Conselho/Assembleia de Representantes. Revelam praticamente todas a mesma consistência que verificamos em IS:

A nível do Conselho Pedagógico temos o papel mais de defender o papel dos estudantes como é óbvio, mais a nível do ensino, a nível das práticas que estão a ser utilizadas no seio da instituição, a definir a nível de calendários de exames, calendários letivos, também a arranjar estratégias para dar a conhecer aos estudantes este órgão, a questão dos inquéritos pedagógicos também muito importante” (IS)

Em relação aos órgãos institucionais do IP também conhecem sobretudo aqueles em que estão representados: Conselho Geral e o Conselho Académico. Todos sabem que existe Associação Académica e alguns mencionam os núcleos de curso. O nível de informação é semelhante ao que revela DA em relação ao Conselho Geral:

(...) já estamos a falar de um órgão bastante diferente, é um órgão máximo do Politécnico, onde (são) discutido(s) temas como a propina, que pode ser definida pelo Politécnico... existe a propina mínima, mas depois a restante pode ser definida pelo Politécnico e, portanto, já entramos aqui num pormenor de importância especial... É onde é aprovado o orçamento do Politécnico, os relatórios de contas...(DA).

Não mencionam, por sua iniciativa, o Conselho de Gestão ou a Provedoria do Estudante. Os estudantes sem cargos institucionais são bastante menos conhecedores da organização da sua UO e do IP, mencionam apenas o Conselho Pedagógico e a Direção da UO, do IP e a Associação Académica. A maior parte destes estudantes entrevistados revelam um conhecimento iníquo da missão e do funcionamento dos órgãos, tal como revela JP

Eu não faço ideia de quem está no Conselho pedagógico. Eu não tenho muito conhecimento dos órgãos ou de como é que as coisas se estruturam, não me levem a mal, mas não sei mesmo. É uma coisa que não nos chega.... mais uma vez não sei se é por eu ser “despassarada” ...porque eu às vezes recebo (informação) (JP)

A ordenação dos cursos é por todos conhecida e muitos mencionam a omissão para o acompanhamento e avaliação do curso que, de acordo com os estatutos aprovados no IPS, inclui obrigatoriamente estudantes (tal obrigatoriedade não existe no IPP).

Em relação ao modo como obtiveram informação sobre os órgãos de gestão do IPS, mencionam por respetiva ordem de importância: a) os koleas; b) as sessões formais de apresentação feitas pelas UO; c) as sessões de esclarecimento feitas pela AIIPS; d) os meios digitais de comunicação (*mail*) e apresentação das UO/IP (página, redes sociais) e e) a sensibilização por parte dos docentes. Contudo, são sem dúvida os koleas que assumem a função ativa de recrutamento para todos os órgãos, sobretudo para a Associação Académica. Na prática, apesar de algumas exceções, os cargos são naturalmente assumidos entre quem vai sair e quem é convidado para entrar, dado que a maior parte das vezes há uma lista única. Os testemunhos destes dois estudantes são representativos do que a maior parte relata:

Da parte da Associação Académica foi mais o contato com os outros estudantes e mesmo o contato que fizeram comigo para participar e perceber se eu tinha algum tipo de interesse (...) E depois surge um boadinho porque na minha unidade orgânica, pelo menos no tempo que lá estive, notei que quando aquele

grupo de estudantes de determinando o Curso ia sair da unidade orgânica ou da escola, ficava lá sempre alguém que ajudava os seguintes também a desenvolver o seu papel. (AC)

Es]tive em direto contato com os estudantes e foi a partir daí que mostrei mesmo muito interesse em também poder participar para poder fazer eu uma diferença ali dentro do meu Curso (...) Curiosamente foi também com aquele núcleo (...) de Curso que tivemos todos, ao mesmo tempo, contato com o Conselho Pedagógico e achámos que era muito boa ideia também [es]tarmos cada vez mais envolvidos lá (GD).

Por vezes há exceções como JPC que obteve informação através da semana de reflexão organizada pelo Conselho Pedagógico da sua UO e, por sua iniciativa, elaborou uma lista, não tendo ganho, mas tendo sido eleito, tal como refere:

A Escola de Saúde tem aquele programa de integração dos estudantes logo na primeira semana de aulas...e nessa altura houve uma sessão de esclarecimento em que explicaram como é que funcionava a escola e os diversos órgãos que a própria escola tem. Na altura houve, se me lembro, na sessão em que estavam a explicar o Conselho Pedagógico, o Conselho de Representantes (...) tive vontade de criar uma lista e dinamizei uma lista para o CR por ter menos elementos e ser mais fácil. Achei por criar a lista com alguns colegas que tinha conhecido vários cursos na altura, até mesmo naquela semana de integração (JPC).

Contudo, a eficácia destas sessões (ainda que possam ter organizações diferentes de UO para UO) não é igual para todos:

(...) já tinha ouvido falar de alguns destes órgãos porque no nosso primeiro ano quando chegamos à instituição são logo feitas estas apresentações, mas são tantas novidades que nós em primeira instância ouvimos tudo, mas não retemos nada (IS)”

Ainda no âmbito das experiências, RP fala-nos do papel de um docente:

Quando eu cheguei já tive muito contato com um professor que inclusive é o meu orientador profissional que é o professor SC. Ele também faz parte do Conselho pedagógico e na altura era o final do meu primeiro ano, se eu não me engano, ele comentou comigo que seriam as eleições, ele me perguntou se não estaria interessado, já que tinha alguma experiência. (RP).

Relativamente aos estudantes sem cargos institucionais, nenhum dos meios anteriormente citados assume grande importância. Nestes casos a informação não chega a despertar-lhes interesse, como transparece no testemunho desta estudante:

Os mails que aparecem normalmente vêm sempre dos presidentes e assim, também são muito grandes e acho por não lhe dar assim muita atenção, é só por alto e pronto (BS).

Conclui-se da importância dos pares em todo este processo de assunção de uma participação institucional, o que nos parece evidenciar aspetos positivos já que a informalidade dos contatos parece ter eficácia na renovação dos estudantes que assumem cargos. Por outro lado, evidencia também uma certa fragilidade do papel institucional, já que há menor aliança das estratégias de comunicação das UO e do IP. Parece também não haver maturidade democrática suficiente para se criarem processos de discussão que originem várias listas e discussões mais profícuas,

motivando os estudantes a participar nessa escolha. Contudo, também não nos parece que este problema seja um exclusivo da participação estudantil.

### 3. Atitude e opinião sobre a participação dos estudantes no atual modelo de gestão do ensino superior

#### 3.1. Atividades e Impacto da Participação

As atividades realizadas pelos estudantes dependem dos órgãos institucionais que integram. Nos Conselhos de Representantes das UO foram em geral as alterações dos estatutos as atividades que mais referiram, assim como a eleição do diretor/a da UO. Nos Conselhos Pedagógicos, atividades relativas à elaboração do calendário escolar, marcação de atividades de avaliação e/ou alterações/revisões em estatutos/regras da atividade acadêmica; há apenas referência de uma estudante relativamente a descontentamento com atividades pedagógicas ou doentes em concreto e nenhuma referência a processos de natureza disciplinar ou de contestação da avaliação acadêmica. No Conselho Geral e no Conselho Académico do IP, referência à eleição do presidente, revisão de estatutos e análise de ofertas formativas. Nas Associações Académicas muitas indicações de preocupação com o acolhimento e bem-estar dos estudantes e algumas referências que se prendem com a pandemia e com a dificuldade que a mesma causou no acesso às atividades em ensino remoto. Os estudantes sentem-se em geral bem acolhidos nos órgãos e que há reatividade à sua presença e às suas opiniões, tal como refere este estudante:

Relativamente a essa questão, sempre fomos bem acolhidos no CR, todas as propostas e sugestões que apresentámos sempre foram esutadas e sempre foram ouvidas e em termos de discussão, até muitas delas foram alvo, para professores e trabalhadores não doentes, do despertar de algum outro ponto de vista que, se falar, não estavam recordados na altura. E foi importante para a discussão do momento, de certo modo também contribuiu nessa troca de conhecimentos e ideias (JPC).

(...) Eu fiz parte da comissão que esteve a fazer a revisão dos estatutos para apresentar ao restante órgão e que recolheu os contributos dos vários órgãos que a escola tem e que foram aultados nesta decisão e aí senti-me completamente integrada em relação ao grupo em que estava a trabalhar (IS)

Assim, o descontentamento é muito pontual, os motivos invoados para o mesmo prendem-se com: a) o órgão reunir mais em comissão permanente do que em assembleia; b) falta de impacto de algumas das queixas apresentadas relativamente a problemas com algumas UC/doentes e/ou condições (por exemplo, horários) /instalações. Noutros órgãos, os estudantes sentem-se algo desloados pois muitos dos assuntos em agenda não lhes dizem respeito e têm dificuldade em compreendê-los, como nos relata esta estudante:

No Conselho Geral (IPS), porque há muitas coisas que sinceramente, a nós como estudantes... quando estão a falar do mapa de venimentos do pessoal e et não me vou meter...os professores que que argumentem o que tiverem a argumentar...não me vou meter, eu sei e percebo o que é que está a ser falado, mas não tenho muito para contribuir (IS)

Para além destas dificuldades que se prendem com a agenda das reuniões dos órgãos ser, por vezes, um pouco distante dos interesses dos estudantes, pelo menos uma

das estudantes foi uma menor valorização das suas opiniões e do seu impacto nos órgãos em que a representação não é paritária.

### 3.2. Sugestões para incentivar a participação

Os estudantes não consideram grandes alterações a efetuar na atual legislação e naquilo que ela determina em termos da constituição dos órgãos institucionais e respetiva participação dos estudantes. A posição evidenciada por JPC é, assim, a mais comum:

A nível de modelo em si, acho que está bem concebido, não acho que seria benéfico criar mais um órgão. O que eu acho é que deveria ser benéfico arranjar um mecanismo para, de alguma forma, informar os estudantes e dar a conhecer...

A maior parte dos estudantes auscultados rejeita mesmo que o problema da falta de participação resida na legislação ou no regimento e/ou funcionamento dos órgãos. Há apenas uma estudante a sugerir problemas que se prendem com a efetiva paridade nos órgãos em que ela existe:

(...) o Conselho Pedagógico é um órgão paritário, é verdade, mas a partir do momento que a última decisão, em caso de empate é do presidente do Pedagógico e é um docente...se chegarmos a um empate perdemos a paridade (IS).

Esta estudante aborda ainda questões relativas à divulgação junto da comunidade do trabalho que é realizado em cada um dos órgãos:

(...) há mais a questão da divulgação das atas, do que é que foi falado...eu sei que não é uma obrigação... acho que também se queremos ativar os estudantes e as pessoas a participarem e a terem um papel ativo nestes órgãos, quanto mais expusermos o que é que o que é que lá acontece, mais pode levar as pessoas a quererem participar (IS)

Os estudantes fazem incidir as suas sugestões em duas dinâmicas institucionais que lhes parecem estar em falta: a) melhor e mais adequada divulgação da informação relativa aos órgãos, respetiva missão e papel dos estudantes e; b) reconhecimento, valorização institucional daqueles que assumem um papel ativo, assim como a partilha pública das experiências de quem o fez. Fazem ainda comentários e sugestões mais gerais que se prendem com a assunção de responsabilidades no quadro de uma cidadania ativa ao longo da vida e, obviamente, também no ensino superior.

Relativamente à informação, as sugestões não são muito consonantes. Uma parte dos estudantes considera que a informação se deve direcionar cada vez mais para uma digitalização mais próxima dos fóruns jovens, abandonando os formatos tradicionais que recorrem ao papel e ao *correio eletrónico* institucional, sugerindo que se passe a utilizar as redes sociais que se podem facilmente consultar no telemóvel. É essa a sugestão de JPP:

Eu acho que, acima de tudo, a comunicação das instituições com os estudantes tem que ser extremamente atualizada, acho que as próprias instituições estão um bocado há 10 anos atrás, ainda usam, por exemplo, muito texto nos e-mails, papéis colados nas paredes, situações deste género (...) hoje em dia um estudante é extremamente digital, estamos a falar das gerações do digital(...)

portanto tem que haver aqui se criar um dinamismo ou uma digitalização (...)têm que ter uma comunicação muito mais atual, usar outros meios...(JPP).

Contudo, outros estudantes parecem valorizar uma comunicação institucional de maior proximidade, por exemplo através de sessões de informação durante o ano, preferencialmente feitas por outros estudantes, ou mesmo nas aulas com os docentes, tal como sugere IS:

(...) tentar ativar as pessoas e mostrar-lhes o papel que elas podem ter dentro daqueles órgãos. acho que a divulgação devia ser mais...e tentar ser feita por pares, ou seja, acho que nós nos ouvimos mais uns aos outros enquanto estudantes

(...) acho que ao longo destes 5 anos nunca tive nenhum professor ou nunca tive a sorte de estar numa aula em que um professor meu que me chamasse a atenção para estas eleições (IS)

Estas sugestões não são necessariamente antagónicas, mas parecem valorizar aspetos diferentes.

Quanto ao reconhecimento institucional, apesar dos estudantes saberem que uma vez que assumem cargos têm direito a um estatuto especial, que alguns conhecem e usam (não todos), sentem necessidade de algo que vá para além disso. Há sistemas de creditação que poderão ser usados, nomeadamente o reconhecimento no diploma de tais cargos e funções (suplemento ao diploma) ou, nos casos em que tal existe, a integração numa carteira/dossier de competências curricular ou de complemento curricular. Parece também haver necessidade de trabalhar alguns estereótipos associados a estas funções, designadamente o de que estes estudantes são todos oriundos de juventudes partidárias ou que é esse o seu interesse, assim de como o de que prolongarão inevitavelmente a sua estadia no ensino superior para além da duração normal do curso (isso acontece em alguns casos, mas noutros não).

## 4. Potencial de replicação da aprendizagem feita para outras dimensões da vida cívica ou profissional

Os estudantes que participam em cargos institucionais não revelam apenas satisfação face ao seu impacto nos órgãos, como valorizam as aprendizagens feitas através da participação, realçando a aquisição de competências sociais e pessoais, considerando-as complementares às realizadas na formação específica do curso e um forte fator de enriquecimento. O testemunho destes estudantes é disso revelador:

(...) Adquiri várias aprendizagens (...) nomeadamente a capacidade de ouvir e às vezes...de vez em quando não ouvia muito, e aprendi por aprender com os meus erros. Tive a capacidade de ouvir, de poder liderar (...) e claro de trabalhar em equipa, aprender, por exemplo, a comunicar, também(...) aprender também a gerir. Ter alguma função de organização. Ganhar mais responsabilidade (...)estas capacidades que vou adquirindo nesta Escola, vão ser úteis depois na minha vida profissional/na minha vida pessoal.” (AF)

(...) Eu nunca pensei fazer relatórios de contas, nunca pensei gerir pessoas e eu na área do direito nunca pensei mexer em tantas contas como mexo agora, por exemplo, e neste momento tenho essa capacidade porque a associação deu-me essa capacidade de fazer eventos, lidar com pessoas, saber como falar com



peçoas, saber escrever um e-mail, que a minha maior dificuldade sempre foi escrever e vim para a associação e percebi como é que se escrevia (JPP)

Para além destas aprendizagens, alguns dos estudantes mencionam também o modo como a participação nos órgãos institucionais e na Associação Académica e órgãos aglutinadores dos estudantes a nível nacional e internacional aumentaram o seu nível de conhecimento, designadamente de informação sobre aspetos legais, mas também de compreensão do próprio ensino superior e das suas problemáticas, aspeto potenciado pela partilha e discussão com outros estudantes com funções semelhantes mas também com docentes e não docentes. A maior parte deles refere que estas aprendizagens vão ser úteis no seu futuro como cidadãos e como futuros profissionais, tal como refere esta estudante:

Agora, depois de ter acabado o curso e de estar a começar a tentar desenvolver atividade profissional ou noutros projetos em que eu estou inserida, acho que há coisas e soft skills que nós retiramos destas atividades (Aar)

Alguns estudantes já tinham uma experiência política e/ou associativa anterior, mas não todos. Contudo, depois desta experiência a maior parte ganhou mais vontade de o fazer. Conclui-se que a maior parte dos estudantes relata que sentiu impacto da sua participação nos órgãos e que recolheu da mesma um conjunto de aprendizagens com significado para a sua vida, tanto ao longo da permanência no ensino superior, como para a vida futura, quer em termos profissionais, quer cívicos.

## 5. Notas finais

1. Há um fosso grande em termos de informação e consciência cívica entre os estudantes que assumem cargos institucionais e os que não assumem.
2. Há a tendência para quem assume um cargo institucional vir a assumir também outros, o que gera a ideia de que há um núcleo pequeno de estudantes a assumir este tipo de funções e que as vão “rodando” entre eles.
3. Há tendência para os cargos se irem revezando entre pessoas que já se conhecem e eu de algum modo estabeleceram relações de amizade, isto cria a ideia de que não são cargos acessíveis a todos e que a escolha acaba por acontecer dentro de um núcleo restrito. Contudo, há casos que demonstram que um estudante conseguiu por si próprio fazer uma lista e ser eleito sem esse efeito “sucessório”.
4. Os estudantes que exercem cargos estão em geral satisfeitos com as funções que exerceram e com o modo como o fizeram, considerando que tiveram impacto no órgão do qual fizeram parte.
5. Os estudantes que exerceram cargos institucionais sentiram um impacto em termos de aquisição de novas competências sociais e pessoais muito significativo, designando que tais *soft skills* lhes irão ser muito úteis no futuro, em várias esferas da sua vida.
6. A escassa participação formal dos estudantes (órgãos e atos eleitorais) tem múltiplos fatores, nenhum deles preponderante. Há motivos estruturais de fundo que se prendem com a educação escolar e familiar que não a incentiva. Há motivos que se prendem com problemas institucionais das instituições de ensino superior e que são sobretudo relativos à informação que é prestada aos

estudantes, pouca valorização destas funções e condições que podem não ser facilitadoras. Há motivos que se prendem com os próprios estudantes e com o modo como dinamizam entre eles esta assunção de cargos que tende a privilegiar conhecimentos já existentes e relações de amizade estabelecidas, o que pode sugerir que há pouco lugar para os “novos”.

7. Em termos de sugestões de mudança, tem destaque a informação sobre a organização institucional e, sobretudo, aquela que diz respeito às oportunidades de participação dos estudantes na mesma, ou seja, ao modo as instituições conhecem e disseminam a informação que na perspectiva dos estudantes é desadequada e devia ser objeto de reflexão e alteração.
8. As formas de organização e trabalho dentro dos órgãos podem ser ainda melhoradas, embora não sejam objeto de forte crítica. A melhoria passa pela organização das agendas de forma aos estudantes compreenderem melhor os assuntos em discussão e pela forma de publicação daquilo que o órgão realiza, seja através de atas ou de outras modalidades mais apelativas e menos formais.

## CAPÍTULO QUINTO

### VALORIZAÇÃO DA PARTICIPAÇÃO, SEM PARTICIPAÇÃO? - AS RESPOSTAS AO QUESTIONÁRIO

Neste capítulo apresenta-se o resultado da análise das respostas ao inquérito por questionário. Numa primeira seção apresentam-se os quadros e gráficos resultantes da análise das respostas dadas pela globalidade da população inquirida. Na segunda seção deste capítulo encontra-se o cruzamento das respostas com alguns fatores que se revelaram pertinentes do ponto de vista da sua significância estatística: a escola, a idade, o tipo de curso e o ano curricular.

#### 1. Análise global das respostas

Da análise das respostas ao inquérito por questionário constata-se que os estudantes atribuem grande importância à sua participação nas IES onde estudam (Quadro 9), com percentagens de resposta da ordem dos 90% nos valores de “Muito importante” e “Importante” da escala sugerida no questionário e as respostas em “Pouco / nada importante” são residuais.

**Quadro S9 - Importância da participação dos estudantes por tema**

| Tema                                              | Mtº Importante / importante | Pouco / Nada importante | Não sei / Não respondo | Total        |
|---------------------------------------------------|-----------------------------|-------------------------|------------------------|--------------|
| Funcionamento pedagógico                          | 96,08%                      | 2,94%                   | 1,0%                   | 919<br>=100% |
| Estruturação curricular dos cursos                | 91,08%                      | 6,75%                   | 2,2%                   |              |
| Oferta de novos cursos                            | 90,64%                      | 6,53%                   | 2,8%                   |              |
| Organização e o funcionamento dos serviços        | 89,77%                      | 8,38%                   | 1,8%                   |              |
| Disponibilização de apoios sociais aos estudantes | 93,80%                      | 4,03%                   | 2,2%                   |              |
| Interação com a comunidade envolvente             | 90,32%                      | 7,29%                   | 2,4%                   |              |

Mas, verifica-se uma maior diversidade de respostas relativamente às perguntas sobre se os contributos dos estudantes são considerados nas suas instituições, como se pode constatar no Quadro 10. Globalmente e relativamente aos vários temas sugeridos, as respostas dividem-se entre os valores de sempre/muitas vezes e de poucas vezes/nada, mas com uma maior frequência nestes últimos valores, parecendo indicar um nítido contraste entre a valorização que os estudantes fazem da sua participação nestes temas e a constatação de que as suas contribuições não são consideradas em muitos casos.

Na perspetiva dos estudantes, assinala-se uma maior frequência da integração dos contributos dos estudantes relativamente ao funcionamento pedagógico, aos apoios sociais e à organização e funcionamento dos serviços, correspondendo a temas que poderão ser sentidos como afetando diretamente os estudantes no seu quotidiano e serem objeto de uma maior atenção por parte das instituições relativamente à sua participação. No entanto, não são negligenciáveis as frequências das respostas que assinalam uma menor consideração institucional quanto aos contributos dos estudantes.

Relativamente ao tema “interação com a comunidade envolvente” verifica-se que existe uma maioria de estudantes (58,5%) a considerar a integração institucional dos

seus contributos neste âmbito, provavelmente porque os estudantes sentem que são ouvidos relativamente a questões relacionadas com projetos ou eventos de relação com a comunidade associados a situações de estágio ou de intervenção nos contextos locais e regionais <sup>1</sup>.

Os temas “estruturação curricular dos cursos” e “oferta de novos cursos” são aqueles em que uma clara maioria de estudantes considera que os seus contributos não são tidos em conta. Estes temas são habitualmente discutidos e decididos nos órgãos de gestão da Instituição, em que os estudantes têm uma menor ou nenhuma participação, não beneficiando também de uma abordagem mais generalizada na comunidade académica.

**Quadro S10 - Integração dos contributos dos estudantes pela Instituição, por tema**

| Temas                                               | Sempre /Muitas vezes | Poucas vezes | Nunca | Não sei / Não respondo | Total          |
|-----------------------------------------------------|----------------------|--------------|-------|------------------------|----------------|
| O funcionamento pedagógico                          | 43,7%                | 40,2%        | 11,1% | 5,0%                   | 919<br>=100,0% |
| A estruturação curricular dos cursos                | 39,8%                | 36,2%        | 16,3% | 7,6%                   |                |
| A oferta de novos cursos                            | 36,3%                | 36,3%        | 11,9% | 15,5%                  |                |
| A organização e o funcionamento dos serviços        | 44,5%                | 33,6%        | 12,4% | 9,5%                   |                |
| A disponibilização de apoios sociais aos estudantes | 49,6%                | 28,6%        | 7,4%  | 14,4%                  |                |
| A interação com a comunidade envolvente             | 58,5%                | 27,7%        | 4,1%  | 9,6%                   |                |

O quadro 11 apresenta as respostas à questão sobre os fatores que facilitam ou promovem a participação do estudante na instituição e em que, em geral, todos os fatores são valorizados por uma percentagem muito significativa de estudantes, sugerindo que o incentivo à participação dos estudantes deverá atender a uma multiplicidade de fatores.

Faz-se notar a menor valorização do papel das Associações Académicas na promoção da participação dos estudantes, em comparação com os resultados obtidos relativamente aos outros fatores, em que 73,8% dos estudantes consideram-no muito importante ou importante.

Outro fator também menos valorizado pelos estudantes (mas com 67,4%) refere-se à ineficácia da resolução de problemas através do contacto direto e individual com os professores e os serviços, enquanto fator que poderá facilitar e promover a participação formal na instituição. Admite-se que estas respostas dos estudantes resultem do reconhecimento de alguma eficácia dos contactos diretos, dispensando o recurso a instâncias mais formais, o que pode ser relacionado com os resultados apresentados no quadro 10, em que se verifica haver alguma integração dos contributos dos estudantes em vários aspetos do funcionamento da instituição.

<sup>1</sup> Esta interpretação decorre do sentido que os estudantes terão provavelmente atribuído a esta possibilidade de resposta -. “A interação com a comunidade envolvente (projetos, eventos, divulgação da instituição e das formações, etc.”

**Quadro S11 - Fatores que facilitam/promovem a participação na instituição**

| Fatores                                                                                                                          | Mt° importante /importante | Pouco importante | Nada importante | Não sei / Não respondo | Total      |
|----------------------------------------------------------------------------------------------------------------------------------|----------------------------|------------------|-----------------|------------------------|------------|
| O meu interesse pela discussão e tomada de decisão sobre o funcionamento da instituição.                                         | 77,1%                      | 17,7%            | 2,07%           | 3,0%                   | 919 = 100% |
| O interesse que a instituição demonstra em conhecer a minha opinião sobre as suas decisões.                                      | 75,8%                      | 14,8%            | 5,88%           | 3,5%                   |            |
| O convite a participar por parte de colegas ou de professores                                                                    | 84,7%                      | 10,9%            | 1,31%           | 3,2%                   |            |
| Considerar que a minha participação é um dever pessoal                                                                           | 79,9%                      | 13,3%            | 2,72%           | 4,1%                   |            |
| Ter os conhecimentos necessários para participar                                                                                 | 89,6%                      | 6,9%             | 0,76%           | 2,8%                   |            |
| O incentivo da Associação Acadêmica para a participação na instituição                                                           | 73,8%                      | 13,3%            | 6,31%           | 6,6%                   |            |
| A necessidade de afirmar e valorizar a intervenção dos estudantes na instituição                                                 | 89,3%                      | 5,8%             | 1,31%           | 3,6%                   |            |
| Considerar que o contacto direto e individual com os professores e/ou com os serviços não é eficaz para a resolução de problemas | 67,4%                      | 11,8%            | 5,22%           | 15,7%                  |            |
| A disponibilização pela instituição de informação sobre o seu funcionamento e a sua atividade                                    | 88,9%                      | 6,2%             | 0,76%           | 4,1%                   |            |
| Perceber que a instituição valoriza a perspetiva dos estudantes                                                                  | 91,7%                      | 4,6%             | 1,09%           | 2,6%                   |            |
| A divulgação pela instituição de uma informação completa e atualizada sobre o seu funcionamento e a sua atividade                | 90,3%                      | 5,5%             | 0,65%           | 3,5%                   |            |

O quadro 12 refere-se às respostas obtidas à questão sobre os fatores que limitam ou impedem a participação do estudante na instituição.

Todos os fatores são valorizados por uma percentagem significativa de estudantes situando-se acima dos 50% das respostas na maior parte dos casos ou muito perto desta percentagem, o que, mais uma vez confirma a multidimensionalidade dos fatores que influenciam positiva ou negativamente a participação dos estudantes.

No entanto, alguns destes fatores devem ser salientados, já que uma maioria expressiva de estudantes considera a importância da sua indisponibilidade devido ao cumprimento das tarefas escolares (81,2%) e o contacto individual com os professores e/ou com os serviços como forma de resolução dos problemas que os afetam (74,5%). Se a necessidade dos estudantes corresponderem às exigências das suas tarefas enquanto estudantes é um fator de indisponibilidade para a sua participação formal na instituição, a possibilidade de resolverem os problemas, informalmente, através do contacto direto com os professores e/ou com os serviços, torna a sua participação formal na instituição menos importante porque de algum modo a compensa.

Este último aspeto de algum esvaziamento da necessidade de uma participação formal dos estudantes nos processos de gestão institucional, pode-se relacionar com os dados já apresentados no quadro 4, em que se reconhece alguma eficácia na resolução de problemas por esta via mais informal e que ocorre no contexto das relações com os professores. Também e contrariamente ao que seria de esperar num quadro de uma reduzida participação formal dos estudantes nos órgãos de gestão, os dados apresentados atrás no quadro 3 revelam a presença de alguma integração dos contributos dos estudantes nos vários temas relativos ao funcionamento das instituições e com particular incidência nos interesses e necessidades dos estudantes, em que entre 36,3% e 58,5% dos estudantes, consoante os temas, reconhece que os seus contributos são sempre e muitas vezes considerados.

Configura-se assim um quadro de uma reduzida participação formal na instituição, mas em que na informalidade das relações com os professores, os estudantes sentem que são ouvidos e os seus contributos serem considerados no funcionamento institucional.

**Quadro S12 - Fatores de limitação/impedimento da participação dos estudantes na instituição**

|                                                                                                             | Mtº importante /importante | Pouco importante | Nada importante | Não sei / Não respondo | Total      |
|-------------------------------------------------------------------------------------------------------------|----------------------------|------------------|-----------------|------------------------|------------|
| A falta de disponibilidade devido ao cumprimento das tarefas escolares                                      | 81,2%                      | 9,4%             | 2,07%           | 7,4%                   | 919 = 100% |
| Não tenho os conhecimentos necessários para participar                                                      | 63,0%                      | 21,7%            | 5,33%           | 10,0%                  |            |
| O meu desinteresse pela discussão e tomada de decisão sobre o funcionamento da instituição                  | 55,9%                      | 23,1%            | 8,81%           | 12,2%                  |            |
| Considero que a instituição não tem interesse em conhecer a minha opinião sobre o seu funcionamento         | 60,7%                      | 18,5%            | 7,83%           | 12,9%                  |            |
| Nunca recebi um pedido ou convite a participar por parte de colegas ou de professores                       | 51,5%                      | 19,9%            | 14,25%          | 14,4%                  |            |
| Tenho receio de represálias quando enuncio críticas e faço sugestões sobre a instituição                    | 49,9%                      | 20,7%            | 17,52%          | 11,9%                  |            |
| Resolvo os problemas através do contacto direto e individual com os professores e/ou com os serviços        | 74,5%                      | 11,5%            | 4,90%           | 9,0%                   |            |
| Sou de opinião que a instituição considera que não tenho os conhecimentos necessários para ser ouvido/a     | 47,9%                      | 21,4%            | 13,93%          | 16,8%                  |            |
| A instituição não me dá informação sobre o seu funcionamento e a sua atividade                              | 53,0%                      | 22,0%            | 12,30%          | 12,7%                  |            |
| Não tenho disponibilidade para participar por fatores pessoais / familiares                                 | 57,5%                      | 17,8%            | 10,77%          | 13,9%                  |            |
| A informação a que tenho acesso sobre o funcionamento e atividade da instituição é superficial e incompleta | 58,1%                      | 21,0%            | 8,05%           | 12,8%                  |            |
| A falta de incentivo da Associação Académica para os estudantes participarem na instituição                 | 56,5%                      | 20,6%            | 9,14%           | 13,8%                  |            |
| A minha participação é dificultada por fatores profissionais                                                | 48,0%                      | 17,5%            | 20,24%          | 14,3%                  |            |

Os fatores relacionados com a falta de conhecimento / informação atingem também frequências elevadas enquanto fatores limitativos da participação dos estudantes. Isto sugere a necessidade de reforçar os processos de comunicação interna e também de promover atitudes de valorização dos contributos dos estudantes por parte dos responsáveis institucionais, já que são significativas as frequências dos fatores relativos ao desinteresse/desvalorização da instituição relativamente ao contributo dos estudantes.

De notar que 55,9% dos estudantes considera o seu desinteresse como fator muito, importante/importante e que metade dos inquiridos receiam represálias quando opinam sobre o funcionamento da instituição.

De realçar ainda a relativamente reduzida frequência de fatores relacionados com o exercício profissional face aos outros fatores, que ainda assim são assinalados como importantes por 48% dos estudantes.

Esta percentagem de 48% de estudantes que identificam a importância dos fatores profissionais para a limitação da sua participação institucional, poderá decorrer de uma maior generalização de um exercício profissional, para além do que seria de supor a partir do número de estudantes com o estatuto especial de estudantes-trabalhadores.

Figura S9 - Tipos de participação dos estudantes

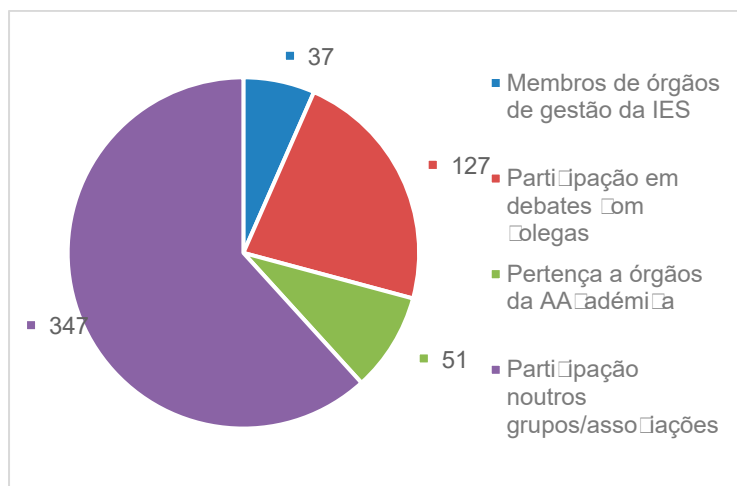

A figura 9 apresenta as respostas dos estudantes inquiridos a um conjunto de questões sobre a sua participação efetiva no contexto institucional e noutros contextos fora da instituição onde estudam. Neste gráfico confirma-se a reduzida participação dos estudantes nos órgãos de gestão das instituições, com apenas 37 (4%) dos inquiridos a indicar a sua pertença às estruturas formais de funcionamento das instituições. De facto, não seria de esperar um resultado diferente já que, por determinação legal, a representação dos estudantes nos órgãos de gestão das IES é bastante reduzida, alargando-se um pouco nos Conselhos Pedagógicos, como o único órgão de gestão com um número maior de representantes dos estudantes (Figura 10). Essa participação alarga-se também um pouco no caso das Associações Académicas, mas mantém-se a um nível bastante reduzido.

Figura S10 - Participação nos órgãos de gestão da IES

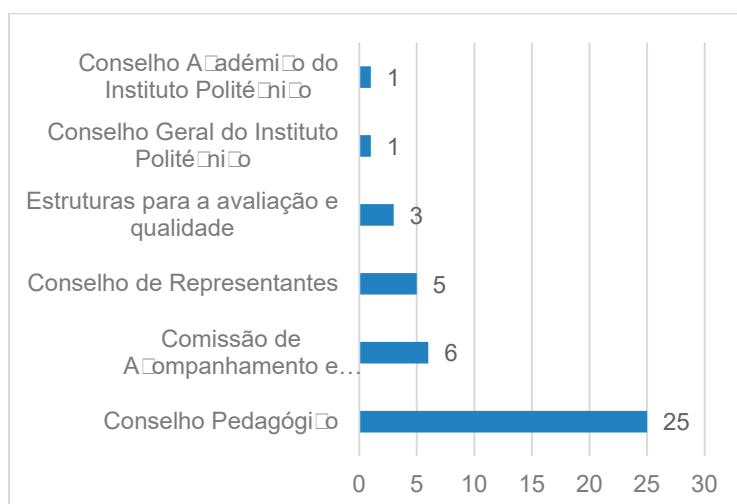

Confirmando a tendência já referida anteriormente relativamente a uma maior participação dos estudantes num registo mais informal, verifica-se ainda na Figura 9 que 127 (13,8%) estudantes, referem a sua participação em debates com colegas sobre o funcionamento da sua escola e curso.

Contrariando a ideia de que os estudantes, em geral, não têm qualquer participação na sociedade, verifica-se que 347 (37,8%) referem participar em grupos e associações

fora da instituição onde estudam: 210 estudantes referem participar em grupos/associações de âmbito desportivo; 143 de carácter social, cultural ou recreativo; cerca de 50 estudantes pertencem a grupos/associações profissionais, religiosas ou político-partidárias (figura 11).

**Figura S11 - Participação em grupos/associações por âmbito de intervenção**

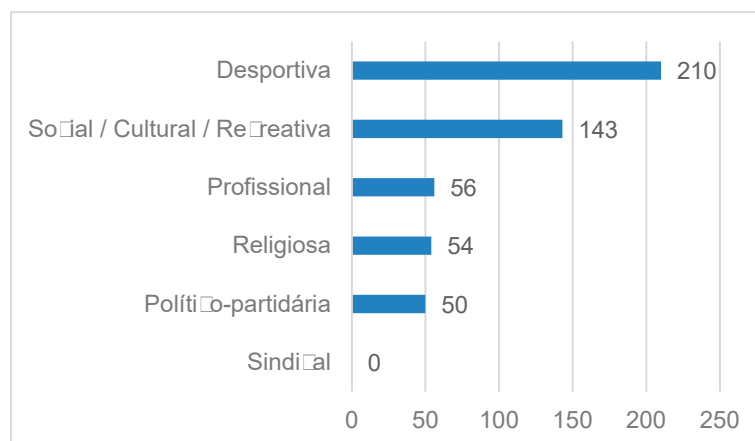

O quadro 13 mostra o modo como os estudantes inquiridos participam nos órgãos de gestão da IES a que pertencem e nas situações de debates com colegas sobre o funcionamento do curso ou da escola. Realça-se uma participação mais passiva dos estudantes no caso dos órgãos de gestão, em que a mera presença e a leitura dos documentos apresentam maiores frequências, enquanto nas situações de debate com colegas assumem um papel mais ativo, expresso na frequência mais elevada da sua intervenção nos debates e na participação em grupos de trabalho. A informalidade destes debates sugere um menor recurso a documentos na orientação das discussões, o que poderá explicar as menores frequências da leitura de documentos e das propostas de alteração. A elaboração de documentos é reduzida nestas duas formas diferentes de participação dos estudantes.

**Quadro S13 - Modo de participação dos estudantes nos órgãos de gestão e em debates com colegas.**

| Modo <sup>2</sup> de participação | Nos órgãos de gestão da IES |       | Em debates com colegas sobre o funcionamento do curso ou da escola |        |
|-----------------------------------|-----------------------------|-------|--------------------------------------------------------------------|--------|
|                                   | N                           | %     | N                                                                  | %      |
| Presença nas reuniões             | 26                          | 70,3% | 127                                                                | 100,0% |
| Leio os documentos                | 22                          | 59,5% | 40                                                                 | 31,5%  |
| Intervenho nos debates            | 16                          | 43,2% | 62                                                                 | 48,8%  |
| Partiço em grupos de trabalho     | 13                          | 35,1% | 64                                                                 | 50,4%  |
| Proponho alterações               | 13                          | 35,1% | 23                                                                 | 18,1%  |
| Elaboro documentos                | 3                           | 8,1%  | 9                                                                  | 7,1%   |

De seguida, apresentam-se alguns quadros que permitem uma melhor caracterização dos estudantes que responderam a este inquérito.

<sup>2</sup> A identificação do curso no questionário foi feita com uma questão aberta, pelo que é possível que muitos estudantes a frequentarem cursos em regime pós-laboral não o tenham indicado, estando por isso incluídos no número de estudantes de Licenciatura.



A maior parte dos estudantes inquiridos frequenta cursos de Licenciatura (67,7%) e apenas 15 estudantes (1,6%) estão a frequentar cursos de licenciatura em horário pós-laboral. Este número de estudantes dos cursos pós-laborais é claramente insuficiente, tendo em conta a sua dimensão na população definida no estudo, pelo que a sua representatividade deve ser relativizada.

**Quadro S14 - Nº de estudantes por tipo de curso**

| Tipo                     | Nº  | Nº (%) |
|--------------------------|-----|--------|
| CTESP                    | 132 | 14,4%  |
| Licenciatura             | 622 | 67,7%  |
| Licenciatura pós-laboral | 15  | 1,6%   |
| Mestrado                 | 141 | 15,3%  |
| (em branço)              | 9   | 1,0%   |
| Total                    | 919 | 100,0% |

**Quadro S15 - Nº de estudantes por ano curricular**

| Ano    | Nº  | Nº (%) |
|--------|-----|--------|
| 1º ano | 385 | 41,9%  |
| 2º ano | 354 | 38,5%  |
| 3º ano | 139 | 15,1%  |
| 4º ano | 13  | 1,4%   |
| Outro  | 28  | 3,0%   |
| Total  | 919 | 100,0% |

O quadro 15 refere-se à identificação do ano curricular em que os estudantes se encontram inscritos registando-se também uma sub-representação dos estudantes do 4º ano, o que resultou de algumas situações de falta de resposta ao questionário e sobretudo é resultado de serem poucos os cursos com 4 anos, que funcionam sobretudo nas escolas da área da Saúde.

**Quadro S16 - Nº de estudantes por escalão etário**

| Escalão etário  | Nº  | Nº (%) |
|-----------------|-----|--------|
| Até 23 anos     | 697 | 75,8%  |
| De 24 a 30 anos | 115 | 12,5%  |
| De 31 a 45 anos | 71  | 7,7%   |
| Mais de 45 anos | 36  | 3,9%   |
| Total           | 919 | 100,0% |

**Quadro 17 - Nº de estudantes por género**

| Género    | Nº  | Nº (%) |
|-----------|-----|--------|
| Feminino  | 453 | 49,3%  |
| Masculino | 457 | 49,7%  |
| Outro     | 9   | 1,0%   |
| Total     | 919 | 100,0% |

A maioria dos estudantes que responderam ao questionário têm até 23 anos e, quanto ao género verifica-se uma distribuição equilibrada entre os géneros masculino e feminino.

## 2. Os fatores mais relevantes da participação dos estudantes

Nesta seção procura-se identificar os fatores que fazem variar de forma significativa as respostas dos estudantes relativamente à importância e à limitação da participação e às modalidades em que ocorre.

Assim, foram encontradas relações estatísticas significativas entre fatores como a Escola, o tipo de curso, o ano curricular, a idade e algumas das restantes respostas dos estudantes. As características dessas relações estatísticas e a sua interpretação possível são apresentadas a seguir.

Embora a distribuição dos estudantes inquiridos pelo género seja igualitária, 49,3% para o género feminino e 49,7% para o masculino, não se encontrou um efeito diferenciador desta variável nas restantes respostas ao questionário.

## 2.1. A participação dos estudantes segundo a escola

Este estudo implicou os estudantes de quatro escolas do IPPortalegre e de cinco do IPSetúbal. E cada uma destas escolas é um contexto de relação entre docentes, não docentes e estudantes, que se desenvolve em função de características particulares relacionadas com a natureza das suas experiências académicas, profissionais e de vida e com a fruição de espaços de vida e profissionais diversificados. Assim, cada escola é o lugar de práticas com alguma especificidade e compreensíveis no quadro das suas características próprias, pelo que é esperável a manifestação dessa especificidade no âmbito da participação institucional dos estudantes.

O quadro 18, a seguir, refere-se às respostas dos estudantes relativamente à integração dos contributos dos estudantes em cada uma das escolas, onde podemos identificar algumas diferenças nas respostas obtidas.

Assim, no IPPortalegre, na maior parte dos temas, os estudantes responderam que nas suas escolas os contributos dos estudantes são sempre e muitas vezes considerados em percentagens superiores a 50%.

No IP Setúbal, para além da ESCE, em que os estudantes referiram maioritariamente a integração dos seus contributos relativamente a temas como a oferta de novos cursos, a organização e o funcionamento dos serviços, a disponibilização de apoios sociais aos estudantes e a Interação com a comunidade envolvente, as frequências de resposta são superiores a 50% apenas no caso da ESE e da EST Setúbal relativamente ao tema da Interação com a comunidade envolvente e na EST Barreiro relativamente ao funcionamento pedagógico. Na ESS do IP Setúbal em todos os temas a frequência de respostas relativamente a estas questões é inferior a 50%.

Também na ESS do IP de Portalegre há uma diminuição das frequências relativamente às outras escolas deste IP.

**Quadro S18 - Integração dos contributos dos estudantes (Sempre/ Muitas vezes) pela Instituição por tema e por escola**

| Escola       |              | Funçãoamento pedagógico | Estruturação curricular dos cursos | Oferta de novos cursos | Organização e o funcionamento dos serviços | Disponibilização de apoios sociais aos estudantes | Interação com a comunidade envolvente | Total |
|--------------|--------------|-------------------------|------------------------------------|------------------------|--------------------------------------------|---------------------------------------------------|---------------------------------------|-------|
| IPPortalegre | ESA Elvas    | 63,0%                   | 55,6%                              | 40,7%                  | 33,3%                                      | 44,4%                                             | 66,7%                                 | 27    |
|              | ESECS        | 60,4%                   | 52,1%                              | 45,8%                  | 58,3%                                      | 66,7%                                             | 68,8%                                 | 48    |
|              | ESS          | 38,1%                   | 40,5%                              | 45,2%                  | 42,9%                                      | 57,1%                                             | 59,5%                                 | 42    |
|              | ESTG         | 52,1%                   | 50,0%                              | 40,6%                  | 55,2%                                      | 53,1%                                             | 61,5%                                 | 96    |
| IPSetúbal    | ESCE         | 43,8%                   | 45,7%                              | 52,4%                  | 54,3%                                      | 54,3%                                             | 66,7%                                 | 105   |
|              | ESE          | 48,3%                   | 37,2%                              | 31,0%                  | 31,0%                                      | 45,5%                                             | 60,0%                                 | 145   |
|              | ESS          | 18,0%                   | 11,5%                              | 11,5%                  | 21,3%                                      | 37,7%                                             | 42,6%                                 | 61    |
|              | EST Setúbal  | 38,5%                   | 35,9%                              | 33,3%                  | 47,1%                                      | 49,7%                                             | 57,4%                                 | 312   |
|              | EST Barreiro | 51,8%                   | 48,2%                              | 38,6%                  | 47,0%                                      | 43,4%                                             | 49,4%                                 | 83    |
| Total (%)    |              | 43,7%                   | 39,8%                              | 36,3%                  | 44,5%                                      | 49,6%                                             | 58,5%                                 | 919   |

O Quadro 19 cruza a escola com as respostas relativamente à importância atribuída aos diversos fatores que facilitam/promovem a participação na instituição.

No âmbito de uma valorização generalizada de todos estes fatores acima dos 50% e em muitos casos perto dos 100%, a diversidade de respostas em função da escola não apresenta diferenças muito relevantes. Apenas nos casos das escolas de tecnologia do IPS se verifica uma redução do nº de estudantes que consideram os vários fatores como muito importantes e importantes, mas sobretudo relativamente a fatores como o interesse manifestado da instituição sobre as opiniões dos estudantes, ser convidado a participar, o papel de incentivo à participação por parte da AA e a consideração que participar é um dever pessoal.

Na ESA Elvas, na ESECS e na ESS do IPPortalegre a valorização feita à generalidade dos fatores ocorre em percentagens perto dos 100%, reduzindo-se ligeiramente em todas as outras escolas.

**Quadro S19 - Fatores que facilitam/promovem a participação na instituição (Muito importante/Importante) por escola**

| Tipos                                                                                                                            | IPPortalegre |       |        |       | IPSetúbal |       |        |             |              | Total (%) |
|----------------------------------------------------------------------------------------------------------------------------------|--------------|-------|--------|-------|-----------|-------|--------|-------------|--------------|-----------|
|                                                                                                                                  | ESA Elvas    | ESECS | ESS    | ESTG  | ESCE      | ESE   | ESS    | EST Setúbal | EST Barreiro |           |
| O meu interesse pela discussão e tomada de decisão sobre o funcionamento da instituição.]                                        | 81,5%        | 87,5% | 90,5%  | 78,1% | 73,3%     | 82,8% | 83,6%  | 70,8%       | 75,9%        | 77,1%     |
| O interesse que a instituição demonstra em conhecer a minha opinião sobre as suas decisões.                                      | 77,8%        | 87,5% | 90,5%  | 81,3% | 78,1%     | 80,7% | 80,3%  | 67,9%       | 69,9%        | 75,8%     |
| O convite a participar por parte de colegas ou de professores                                                                    | 77,8%        | 97,9% | 88,1%  | 84,4% | 86,7%     | 89,0% | 86,9%  | 79,8%       | 84,3%        | 84,7%     |
| Considerar que a minha participação é um dever pessoal                                                                           | 85,2%        | 93,8% | 88,1%  | 80,2% | 82,9%     | 87,6% | 83,6%  | 70,5%       | 80,7%        | 79,9%     |
| Ter os conhecimentos necessários para participar                                                                                 | 96,3%        | 97,9% | 97,6%  | 94,8% | 94,3%     | 88,3% | 96,7%  | 83,3%       | 86,7%        | 89,6%     |
| O incentivo da Associação Académica para a participação na instituição                                                           | 77,8%        | 89,6% | 92,9%  | 80,2% | 74,3%     | 76,6% | 75,4%  | 67,0%       | 65,1%        | 73,8%     |
| A necessidade de afirmar e valorizar a intervenção dos estudantes na instituição                                                 | 92,6%        | 93,8% | 100,0% | 84,4% | 91,4%     | 90,3% | 96,7%  | 87,2%       | 84,3%        | 89,3%     |
| Considerar que o contacto direto e individual com os professores e/ou com os serviços não é eficaz para a resolução de problemas | 66,7%        | 75,0% | 73,8%  | 62,5% | 79,0%     | 66,2% | 62,3%  | 62,2%       | 75,9%        | 67,4%     |
| A disponibilização pela instituição de informação sobre o seu funcionamento e a sua atividade                                    | 96,3%        | 93,8% | 100,0% | 88,5% | 88,6%     | 89,0% | 90,2%  | 86,2%       | 88,0%        | 88,9%     |
| Perceber que a instituição valoriza a perspectiva dos estudantes                                                                 | 92,6%        | 93,8% | 97,6%  | 88,5% | 90,5%     | 91,7% | 100,0% | 91,0%       | 89,2%        | 91,7%     |
| A divulgação pela instituição de uma informação completa e atualizada sobre o seu funcionamento e a sua atividade                | 96,3%        | 95,8% | 100,0% | 90,6% | 92,4%     | 91,7% | 95,1%  | 85,9%       | 88,0%        | 90,3%     |

**Quadro S19 - Fatores que facilitam/promovem a participação na instituição (Muito importante/Importante) por escola**

| Tipos | IPPortalegre |       |     |      | IPSetúbal |     |     |             |              | Total (%) |
|-------|--------------|-------|-----|------|-----------|-----|-----|-------------|--------------|-----------|
|       | ESA Elvas    | ESECS | ESS | ESTG | ESCE      | ESE | ESS | EST Setúbal | EST Barreiro |           |
| Total | 27           | 48    | 42  | 96   | 105       | 145 | 61  | 312         | 83           | 919       |

Relativamente aos fatores de limitação/impedimento da participação dos estudantes há alguma uniformidade nas respostas dos estudantes entre as várias escolas (Quadro 20), com frequências de resposta em geral acima dos 50%, na atribuição de importância aos vários fatores. No entanto, relativamente à falta de conhecimentos dos estudantes e do desinteresse da instituição sobre as opiniões dos estudantes, regista-se uma diminuição relativa dos estudantes que valorizam estes fatores nas escolas de tecnologia do IPS Setúbal.

Quanto ao rejeio de represálias, 72,9% dos estudantes da ESECS do IP de Portalegre consideram este fator como muito importante/importante, 59,3% na ESA de Elvas e 59% na ESS do IP de Setúbal. Nas restantes escolas este valor ronda os 50%, sendo sensivelmente menor na EST Barreiro (41%).

A resolução de problemas através do contacto direto e individual com os professores e/ou com os serviços como fator que torna menos necessária uma participação mais formal dos estudantes na instituição é considerado como muito importante/importante por 93,8% dos estudantes da ESECS, por 85,2% na ESA de Elvas e por 81% na ESCE do IPSetúbal. As restantes escolas apresentam percentagens perto dos 70%.

Mais do que os estudantes das outras escolas, na ESECS do IP de Portalegre valorizam-se fatores como a instituição considerar a falta de conhecimentos dos estudantes, a falta e a inadequação da informação, a indisponibilidade por questões pessoais, o incentivo da AA e a indisponibilidade por fatores profissionais.

Os estudantes da ESA de Elvas apresentam as menores percentagens na atribuição de importância aos seguintes fatores: a inadequação da informação, a indisponibilidade por questões pessoais/familiares e por fatores profissionais. Também na ESS do IP de Portalegre se regista uma menor percentagem na valorização da indisponibilidade por fatores profissionais.

**Quadro S20 - Fatores de limitação/impedimento da participação dos estudantes na instituição (Muito importante/Importante) por escola**

| Fatores                                                                                                     | IPPortalegre |       |       |       | IPSetúbal |       |       |             |              | Total (%) |
|-------------------------------------------------------------------------------------------------------------|--------------|-------|-------|-------|-----------|-------|-------|-------------|--------------|-----------|
|                                                                                                             | ESA Elvas    | ESECS | ESS   | ESTG  | ESCE      | ESE   | ESS   | EST Setúbal | EST Barreiro |           |
| A falta de disponibilidade devido ao cumprimento das tarefas escolares                                      | 88,9%        | 83,3% | 85,7% | 75,0% | 82,9%     | 81,4% | 88,5% | 81,4%       | 73,5%        | 81,2%     |
| Não tenho os conhecimentos necessários para participar                                                      | 63,0%        | 68,8% | 66,7% | 64,6% | 66,7%     | 63,4% | 72,1% | 59,3%       | 57,8%        | 63,0%     |
| O meu desinteresse pela discussão e tomada de decisão sobre o funcionamento da instituição                  | 59,3%        | 62,5% | 61,9% | 58,3% | 60,0%     | 56,6% | 52,5% | 51,6%       | 57,8%        | 55,9%     |
| Considero que a instituição não tem interesse em conhecer a minha opinião sobre o seu funcionamento         | 66,7%        | 68,8% | 59,5% | 60,4% | 62,9%     | 66,9% | 67,2% | 55,4%       | 56,6%        | 60,7%     |
| Nunca recebi um pedido ou convite a participar por parte de colegas ou de professores                       | 55,6%        | 60,4% | 52,4% | 51,0% | 54,3%     | 49,7% | 49,2% | 49,4%       | 54,2%        | 51,5%     |
| Tenho receio de represálias quando enuncio críticas e faço sugestões sobre a instituição                    | 59,3%        | 72,9% | 47,6% | 51,0% | 48,6%     | 49,0% | 59,0% | 47,1%       | 41,0%        | 49,9%     |
| Resolvo os problemas através do contacto direto e individual com os professores e/ou com os serviços        | 85,2%        | 93,8% | 76,2% | 70,8% | 81,0%     | 71,7% | 73,8% | 70,2%       | 77,1%        | 74,5%     |
| Sou de opinião que a instituição considera que não tenho os conhecimentos necessários para ser ouvido/a     | 44,4%        | 62,5% | 40,5% | 43,8% | 55,2%     | 52,4% | 50,8% | 42,3%       | 50,6%        | 47,9%     |
| A instituição não me dá informação sobre o seu funcionamento e a sua atividade                              | 55,6%        | 64,6% | 47,6% | 54,2% | 51,4%     | 58,6% | 54,1% | 49,0%       | 53,0%        | 53,0%     |
| Não tenho disponibilidade para participar por fatores pessoais / familiares                                 | 44,4%        | 72,9% | 52,4% | 58,3% | 61,0%     | 63,4% | 63,9% | 51,6%       | 56,6%        | 57,5%     |
| A informação a que tenho acesso sobre o funcionamento e atividade da instituição é superficial e incompleta | 44,4%        | 72,9% | 57,1% | 50,0% | 57,1%     | 66,2% | 57,4% | 55,4%       | 61,4%        | 58,1%     |
| A falta de incentivo da Associação Académica para os estudantes participarem na instituição                 | 66,7%        | 77,1% | 54,8% | 55,2% | 49,5%     | 57,2% | 57,4% | 55,8%       | 53,0%        | 56,5%     |

**Quadro S20 - Fatores de limitação/impedimento da participação dos estudantes na instituição (Muito importante/Importante) por escola**

| Fatores                                                      | IPPortalegre |       |       |       | IPSetúbal |       |       |             |              | Total (%) |
|--------------------------------------------------------------|--------------|-------|-------|-------|-----------|-------|-------|-------------|--------------|-----------|
|                                                              | ESA Elvas    | ESECS | ESS   | ESTG  | ESCE      | ESE   | ESS   | EST Setúbal | EST Barreiro |           |
| A minha participação é dificultada por fatores profissionais | 44,4%        | 68,8% | 33,3% | 45,8% | 58,1%     | 48,3% | 42,6% | 43,3%       | 55,4%        | 48,0%     |
| Total                                                        | 27           | 48    | 42    | 96    | 105       | 145   | 61    | 312         | 83           | 919       |

## 2.2. A relação das respostas com o tipo de curso e o ano curricular

Estar a frequentar um CTESP, uma licenciatura em regime pós-laboral ou um Mestrado, constituem diferentes momentos no percurso formativo dos estudantes e eventuais articulações com outras atividades, o que pode implicar diferentes modos de integração na instituição e diferentes posicionamentos quanto ao valor da participação dos estudantes. O mesmo se pode dizer do ano curricular frequentado pelos estudantes, enquanto indício de diferentes níveis de experiência, de saberes e de disponibilidade, com implicações nas atitudes, níveis e formas de participação dos estudantes.

E foram encontradas algumas diferenças nas respostas dos estudantes, em função do tipo de curso e do ano curricular. Nomeadamente no Quadro 21, em que os estudantes dos CTESP são os que mais frequentemente consideram a integração dos seus contributos nos vários temas, o que poderá significar uma maior atenção das instituições à especificidade destes estudantes e às suas dificuldades. As frequências de resposta diminuem significativamente no caso dos estudantes de Mestrado, o que pode indicar uma menor integração institucional destes estudantes provavelmente decorrente da sua menor e menos frequente presença nas escolas devido aos horários e calendários deste tipo de cursos.

Nos vários temas e em geral há uma diminuição das frequências de resposta nas licenciaturas.

No tema da interação com a comunidade, provavelmente pela relação dos estudantes com os contextos dos estágios curriculares ou de projetos desenvolvidos no âmbito dos seus cursos, revelam-se frequências mais significativas na resposta à questão sobre a consideração pela instituição dos contributos dos estudantes. Essa frequência diminui sensivelmente no caso dos Mestrados.

No caso das licenciaturas e dos mestrados e quanto à estruturação curricular dos cursos há uma diminuição do nº de estudantes que consideram que os seus contributos são sempre/muitas vezes atendidos pela instituição, o que também se verifica no caso da oferta de novos cursos, mas com menos respostas nas licenciaturas noturnas.

Os contributos dos estudantes relativamente à disponibilização de apoios sociais são considerados pela instituição, na opinião da maioria dos estudantes de CTESP, das licenciaturas e das licenciaturas noturnas. Apenas 34,8% dos estudantes de Mestrado referem a integração institucional dos seus contributos neste tema.

**Quadro S21 – Integração dos contributos dos estudantes pela Instituição (Sempre /Muitas vezes) por tema e por tipo de curso**

| Temas                                               | CTESP        | Liçençatura  | Liçençatura Noturno | Mestrado     | (em branco)  | Total (%) |
|-----------------------------------------------------|--------------|--------------|---------------------|--------------|--------------|-----------|
| O funcionamento pedagógico                          | <b>59,1%</b> | 41,8%        | <b>53,3%</b>        | <b>36,9%</b> | 44,4%        | 43,7%     |
| A estruturação curricular dos cursos                | <b>57,6%</b> | <b>38,1%</b> | 46,7%               | <b>30,5%</b> | <b>33,3%</b> | 39,8%     |
| A oferta de novos cursos                            | <b>52,3%</b> | 34,6%        | <b>26,7%</b>        | <b>29,8%</b> | 44,4%        | 36,3%     |
| A organização e o funcionamento dos serviços        | <b>63,6%</b> | 43,7%        | 46,7%               | <b>30,5%</b> | <b>33,3%</b> | 44,5%     |
| A disponibilização de apoios sociais aos estudantes | <b>60,6%</b> | 50,5%        | 53,3%               | <b>34,8%</b> | 55,6%        | 49,6%     |
| A interação com a comunidade envolvente             | <b>65,9%</b> | <b>59,2%</b> | <b>53,3%</b>        | <b>49,6%</b> | 55,6%        | 58,5%     |
| Total                                               | 132          | 622          | 15                  | 141          | 9            | 919       |

Como já foi referido, a falta de disponibilidade dos estudantes para participarem devido ao cumprimento das tarefas escolares é o fator mais valorizado, com 81,2 % de todos os estudantes a considerarem-no como muito importante/importante. Mas, como se pode constatar no quadro 22, é o fator mais sentido como muito importante ou importante nos casos das Licenciaturas, sobretudo nas que funcionam em regime pós-laboral e dos Mestrados. Os estudantes dos CTESP tendem a atribuir-lhe uma menor importância.

Como seria de esperar, os estudantes das licenciaturas pós-laborais e os dos mestrados realçam as limitações da sua participação devido a fatores pessoais, familiares e profissionais, devido à probabilidade de se tratar de estudantes-trabalhadores. O seu nível de participação é mais reduzido que os outros estudantes e a sua integração na instituição é mais frágil, por isso também tendem a valorizar fatores como o desconhecimento sobre o funcionamento institucional e mais dificuldades no acesso à informação.

Embora valorizem a resolução de problemas diretamente com os professores, 86,7% nas licenciaturas pós-laborais e 79,4% nos Mestrados, estes estudantes revelam algum sentimento de alheamento por parte da instituição com 86,7% dos estudantes das licenciaturas pós-laborais a referirem-se à importância do desinteresse da instituição relativamente às suas opiniões.

Em todos os tipos de curso, mas de forma mais acentuada nas licenciaturas pós-laborais, a resolução dos problemas através do contacto direto e individual com os professores e/ou com os serviços é referido como um fator importante de limitação de uma participação formal na instituição por perentagens significativas dos estudantes – entre 70,5% e 86,7%.

Quanto aos estudantes das licenciaturas (diurnas) o fator de limitação mais valorizado é o da falta de disponibilidade devido às tarefas escolares (81,5%). Estes estudantes também valorizam o rejeio de represálias de forma mais significativa do que os restantes tipos de curso. O desinteresse dos estudantes em participar e as questões relacionadas com o acesso à informação e à sua qualidade não são muito diferentes das respostas dos outros tipos de curso.



**Quadro S22 - Fatores de limitação/impedimento da participação dos estudantes na instituição (Muito importante/Importante) pelo Tipo de Curso)**

| Fatores                                                                                                     | Tipos de Curso |              |                          |          |             |           |
|-------------------------------------------------------------------------------------------------------------|----------------|--------------|--------------------------|----------|-------------|-----------|
|                                                                                                             | CTESP          | Licenciatura | Licenciatura pós-laboral | Mestrado | (em branco) | Total (%) |
| A falta de disponibilidade devido ao cumprimento das tarefas escolares                                      | 75,0%          | 81,5%        | 86,7%                    | 85,8%    | 66,7%       | 81,2%     |
| Não tenho os conhecimentos necessários para participar                                                      | 56,1%          | 63,2%        | 80,0%                    | 67,4%    | 55,6%       | 63,0%     |
| O meu desinteresse pela discussão e tomada de decisão sobre o funcionamento da instituição                  | 56,1%          | 56,6%        | 46,7%                    | 53,9%    | 55,6%       | 55,9%     |
| Considero que a instituição não tem interesse em conhecer a minha opinião sobre o seu funcionamento         | 56,8%          | 60,6%        | 86,7%                    | 61,7%    | 66,7%       | 60,7%     |
| Nunca recebi um pedido ou convite a participar por parte de colegas ou de professores                       | 49,2%          | 49,2%        | 60,0%                    | 62,4%    | 55,6%       | 51,5%     |
| Tenho receio de represálias quando enuncio críticas e faço sugestões sobre a instituição                    | 46,2%          | 52,1%        | 46,7%                    | 42,6%    | 77,8%       | 49,9%     |
| Resolvo os problemas através do contacto direto e individual com os professores e/ou com os serviços        | 70,5%          | 73,8%        | 86,7%                    | 79,4%    | 88,9%       | 74,5%     |
| Sou de opinião que a instituição considera que não tenho os conhecimentos necessários para ser ouvido/a     | 50,0%          | 47,3%        | 40,0%                    | 48,9%    | 55,6%       | 47,9%     |
| A instituição não me dá informação sobre o seu funcionamento e a sua atividade                              | 55,3%          | 52,7%        | 60,0%                    | 52,5%    | 33,3%       | 53,0%     |
| Não tenho disponibilidade para participar por fatores pessoais / familiares                                 | 59,1%          | 55,8%        | 86,7%                    | 60,3%    | 55,6%       | 57,5%     |
| A informação a que tenho acesso sobre o funcionamento e atividade da instituição é superficial e incompleta | 58,3%          | 58,5%        | 53,3%                    | 55,3%    | 77,8%       | 58,1%     |
| A falta de incentivo da Associação Académica para os estudantes participarem na instituição                 | 50,0%          | 59,6%        | 46,7%                    | 49,6%    | 55,6%       | 56,5%     |
| A minha participação é dificultada por fatores profissionais                                                | 54,5%          | 42,8%        | 80,0%                    | 61,0%    | 55,6%       | 48,0%     |
| Total                                                                                                       | 132            | 622          | 15                       | 141      | 9           | 919       |

Quanto à relação entre as respostas dos estudantes à integração pela instituição dos seus contributos e o ano curricular em que se situam (Quadro 23), com a evolução dos estudantes na estrutura curricular dos respetivos cursos, é clara a diminuição do nº de estudantes que consideram que esses contributos são considerados sempre/muitas vezes. Essa redução ocorre de forma sensível do 1º para o 2º ano e acentua-se nos seguintes.

Assim, estes dados contrariam o que seria expectável - uma crescente integração dos estudantes na instituição à medida que evoluem na estrutura curricular do seu curso

**Quadro S23 - Integração dos contributos dos estudantes Sempre /Muitas vezes pela Instituição por tema e por ano curricular**

| Temas                                               | 1º ano | 2º ano | 3º ano | 4º ano | Outra situação | Total (%) |
|-----------------------------------------------------|--------|--------|--------|--------|----------------|-----------|
| O funcionamento pedagógico                          | 50,9%  | 43,2%  | 26,6%  | 15,4%  | 50,0%          | 43,7%     |
| A estruturação curricular dos cursos                | 49,4%  | 37,0%  | 21,6%  | 30,8%  | 39,3%          | 39,8%     |
| A oferta de novos cursos                            | 43,6%  | 35,3%  | 20,1%  | 15,4%  | 39,3%          | 36,3%     |
| A organização e o funcionamento dos serviços        | 51,4%  | 43,5%  | 30,9%  | 23,1%  | 39,3%          | 44,5%     |
| A disponibilização de apoios sociais aos estudantes | 53,0%  | 49,2%  | 47,5%  | 15,4%  | 35,7%          | 49,6%     |
| A interação com a comunidade envolvente             | 60,8%  | 58,5%  | 56,8%  | 38,5%  | 46,4%          | 58,5%     |
| Total                                               | 385    | 354    | 139    | 13     | 28             | 919       |

### 2.3. Participação e idade dos estudantes

O quadro 24 mostra a relação entre o escalão etário dos estudantes e as suas respostas relativamente a fatores de limitação/impedimento da participação dos estudantes na instituição e em que se evidencia que os estudantes mais velhos tendem a uma maior valorização dos diversos fatores de limitação / impedimento da sua participação institucional, o que pode significar uma maior distância destes estudantes relativamente ao funcionamento da instituição.

**Quadro S24 - Fatores de limitação/impedimento da participação dos estudantes na instituição (Muito importante/Importante) pelo escalão etário**

| Fatores                                                                                                     | Até 23 anos | De 24 a 30 anos | De 31 a 45 anos | Mais de 45 anos | Total (%) |
|-------------------------------------------------------------------------------------------------------------|-------------|-----------------|-----------------|-----------------|-----------|
| A falta de disponibilidade devido ao cumprimento das tarefas escolares                                      | 80,6%       | 85,2%           | 76,1%           | 88,9%           | 81,2%     |
| Não tenho os conhecimentos necessários para participar                                                      | 62,1%       | 66,1%           | 59,2%           | 77,8%           | 63,0%     |
| O meu desinteresse pela discussão e tomada de decisão sobre o funcionamento da instituição                  | 55,4%       | 60,0%           | 50,7%           | 63,9%           | 55,9%     |
| Considero que a instituição não tem interesse em conhecer a minha opinião sobre o seu funcionamento         | 59,8%       | 56,5%           | 73,2%           | 66,7%           | 60,7%     |
| Nunca recebi um pedido ou convite a participar por parte de colegas ou de professores                       | 48,6%       | 61,7%           | 63,4%           | 50,0%           | 51,5%     |
| Tenho receio de represálias quando enuncio críticas e faço sugestões sobre a instituição                    | 50,1%       | 54,8%           | 47,9%           | 36,1%           | 49,9%     |
| Resolvo os problemas através do contacto direto e individual com os professores e/ou com os serviços        | 72,7%       | 75,7%           | 84,5%           | 86,1%           | 74,5%     |
| Sou de opinião que a instituição considera que não tenho os conhecimentos necessários para ser ouvido/a     | 47,3%       | 45,2%           | 56,3%           | 50,0%           | 47,9%     |
| A instituição não me dá informação sobre o seu funcionamento e a sua atividade                              | 52,4%       | 53,0%           | 53,5%           | 63,9%           | 53,0%     |
| Não tenho disponibilidade para participar por fatores pessoais / familiares                                 | 55,1%       | 64,3%           | 62,0%           | 72,2%           | 57,5%     |
| A informação a que tenho acesso sobre o funcionamento e atividade da instituição é superficial e incompleta | 57,4%       | 60,0%           | 56,3%           | 69,4%           | 58,1%     |
| A falta de incentivo da Associação Académica para os estudantes participarem na instituição                 | 56,2%       | 63,5%           | 46,5%           | 58,3%           | 56,5%     |
| A minha participação é dificultada por fatores profissionais                                                | 41,0%       | 62,6%           | 74,6%           | 83,3%           | 48,0%     |
| Total                                                                                                       | 697         | 115             | 71              | 36              | 919       |

Esse distanciamento pode relacionar-se com a expressão das dificuldades decorrentes da vida pessoal e profissional dos estudantes, na falta de conhecimentos, no acesso e na qualidade da informação sobre a instituição.

Mas fazem uma menor valorização do receio de represálias e da receção de um convite. São também estes estudantes que privilegiam a resolução direta dos problemas com professores e serviços em detrimento de uma participação formal na instituição.

## **CAPÍTULO SEXTO**

### **APRESENTAÇÃO E ANÁLISE DOS RESULTADOS FINAIS**

Na sequência da aplicação das técnicas de recolha e de análise de dados adotadas para o presente estudo (pesquisa documental, inquéritos por questionário e por entrevista), procede-se seguidamente a uma apresentação dos principais resultados obtidos, tendo em conta os objetivos do projeto.

Como atrás referido, as técnicas foram aplicadas de forma sequencial, tendo cada uma delas correspondido a uma recolha e análise de dados que possibilitaram a apresentação dos respetivos resultados, de onde resultou a seleção de informação que serviu de base à técnica seguinte.

A fim de proceder a uma análise global dos resultados, efetuou-se o cruzamento dos resultados obtidos a partir de cada uma das técnicas em uso e com os objetivos da investigação, designadamente:

1. Caracterizar a participação dos estudantes nos órgãos de governo das IES em que têm assento e nas associações estudantis, ao longo dos últimos cinco anos;
2. Identificar fatores de facilitação e constrangimentos presentes quer nas normas e nos documentos legais quer nas práticas instituídas;
3. Analisar as perspetivas dos estudantes sobre a sua participação na governação das IES.

Como atrás referido, para essa análise usou-se uma tabela, que seguidamente se apresenta, setorialmente organizada em torno de cada um dos objetivos e intercalada com a respetiva análise cruzada dos resultados obtidos com as três técnicas de recolha utilizadas.

#### **1. Caracterização da participação dos estudantes nos órgãos**

No que se refere à caracterização da participação dos estudantes nos diferentes órgãos das duas instituições em estudo, apresenta-se na tabela seguinte os principais resultados obtidos pelas três técnicas de recolha de dados.

**Quadro S25: Caracterização da participação dos estudantes nos órgãos de governo das IES: resumo dos principais resultados obtidos pelos diferentes métodos**

| Pesquisa documental                                                                                                                                                                                                                                                                                                                                                                                                                                                                                                                                                                                                                | Questionário                                                                                                                                                                                                                                                                                                                                                                                                                                                                                                                                                                                                                                                                                                                                                                                                                                                                                               | Entrevista                                                                                                                                                                                                                                                                                                                                                                                                                                                                                                                                                                                                                                                                                                                                                                                                                                                                                                                                                                                                                                                                                                                                                                                                                                                                                                                                              |
|------------------------------------------------------------------------------------------------------------------------------------------------------------------------------------------------------------------------------------------------------------------------------------------------------------------------------------------------------------------------------------------------------------------------------------------------------------------------------------------------------------------------------------------------------------------------------------------------------------------------------------|------------------------------------------------------------------------------------------------------------------------------------------------------------------------------------------------------------------------------------------------------------------------------------------------------------------------------------------------------------------------------------------------------------------------------------------------------------------------------------------------------------------------------------------------------------------------------------------------------------------------------------------------------------------------------------------------------------------------------------------------------------------------------------------------------------------------------------------------------------------------------------------------------------|---------------------------------------------------------------------------------------------------------------------------------------------------------------------------------------------------------------------------------------------------------------------------------------------------------------------------------------------------------------------------------------------------------------------------------------------------------------------------------------------------------------------------------------------------------------------------------------------------------------------------------------------------------------------------------------------------------------------------------------------------------------------------------------------------------------------------------------------------------------------------------------------------------------------------------------------------------------------------------------------------------------------------------------------------------------------------------------------------------------------------------------------------------------------------------------------------------------------------------------------------------------------------------------------------------------------------------------------------------|
| <ol style="list-style-type: none"> <li>1. Em geral, reduzida participação dos estudantes nos atos eleitorais das estruturas formais.</li> <li>2. Mais pequena a participação de estudantes (abaixo dos 10%) nos atos eleitorais que abrangem todo o universo de estudantes do IPS (instituição com maior número de estudantes), tendência que não se verifica no IPP (participação acima dos 20%)</li> <li>3. Mais taxas de participação nas eleições das Escolas mais pequenas, no IPS, por oposição ao IPP.</li> <li>4. Distintos níveis de participação nas reuniões institucionais (35%-89% no IPS; 30%-75% no IPP)</li> </ol> | <ol style="list-style-type: none"> <li>1. Reduzida participação dos estudantes nas estruturas formais de funcionamento, mas regista-se a ocorrência de uma participação informal mais significativa com colegas e provavelmente com professores.</li> <li>2. Os níveis de participação dos estudantes aumentam nos debates com colegas e ainda mais, fora do contexto institucional.</li> <li>3. Importância do contexto pessoal para a resolução de problemas justifica a pouca participação em órgãos como o CP</li> <li>4. Reconhecimento de alguma integração institucional dos contributos dos estudantes (quase metade dos estudantes inquiridos consideram que as suas contribuições são frequentemente consideradas na instituição sobretudo em temas como o funcionamento pedagógico, os apoios sociais, a interação com a comunidade e à organização e o funcionamento dos serviços).</li> </ol> | <ol style="list-style-type: none"> <li>1. Maior participação nas eleições dos estudantes com cargos</li> <li>2. Maior dinamismo da campanha para a Associação Académica.</li> <li>3. Razões para o abstençãoismo: a) a existência, em regra, de uma lista única para os órgãos (apresentada muito próxima do ato eleitoral); b) a falta de comunicação entre os estudantes nos órgãos sociais e os demais; c) a ineficácia da informação institucional e d) a falta de cultura democrática.</li> <li>4. Face à participação institucional de caráter formal há uma participação com uma natureza mais informal.</li> <li>5. Nas instituições de ensino superior de pequena e média dimensão, os circuitos de comunicação têm por vezes uma vertente relacional direta, um diálogo mais próximo entre todos, o que parece influenciar de algum modo a perspectiva dos estudantes sobre a relevância dos órgãos institucionais e sobre o papel que os estudantes aí assumem.</li> <li>6. Formas de participação não aprofundadas neste estudo: participação em projetos institucionais, em projetos de investigação, em iniciativas do IP, dinâmicas de curso e/ou de unidades curriculares junto da comunidade.</li> <li>7. Os estudantes sentem-se em geral bem acolhidos nos órgãos e que há reatividade à sua presença e às suas opiniões.</li> </ol> |

Os dados recolhidos sobre a participação dos estudantes na governação das duas instituições confirmam percentagens reduzidas de votantes nos atos eleitorais para os órgãos de gestão e para as Associações Académicas (AA). Essas percentagens são residuais no caso do IP Setúbal (menos de 10%) e um pouco mais elevadas no IP Portalegre, mas inferiores a 40% dos estudantes.

No IP Setúbal, em geral, a participação dos estudantes é menor nos atos eleitorais que abrangem todo o universo de estudantes, como são os casos das eleições para os Conselhos Gerais, possivelmente pelo maior distanciamento das temáticas aí tratadas, que não suscitam o interesse dos estudantes. Mas, nas eleições para as AA o nível de votantes tende a ser também bastante reduzido e apenas ligeiramente superior ao verificado nas eleições para os Conselhos Gerais. Esta tendência não se verifica no IPPortalegre em que as percentagens de votantes são idênticas nas eleições dos órgãos das escolas e nos do IP e na AA.

Contrastando com a reduzida participação da generalidade dos estudantes nos atos eleitorais, os poucos estudantes que integram os órgãos de gestão apresentam uma participação efetiva nas respetivas atividades, com taxas bastante razoáveis, o que parece indicar que os estudantes que se dispõem a integrar os órgãos de gestão assumem de algum modo as suas responsabilidades estando presentes e participando nas reuniões. Estes estudantes poderão corresponder a um perfil mais interessado e mais militante no funcionamento da instituição onde estudam. Aliás, os estudantes entrevistados com cargos institucionais expressam um maior envolvimento nos processos eleitorais, nomeadamente no exercício do seu direito de voto, diferenciando-os dos estudantes sem cargos.

Para além da generalizada reduzida participação nos atos eleitorais, os dados recolhidos revelam que os estudantes têm alguma possibilidade de expressarem as suas opiniões e de verem os seus contributos considerados pela respetiva Instituição, provavelmente, não tanto na formalidade do funcionamento dos órgãos, em que alguns (muito poucos) dos seus pares participam, mas noutros contextos informais, com os colegas, com ou sem professores e Coordenadores de Curso. Confirmando este registo mais informal de participação, os estudantes entrevistados expressam a sua familiaridade com os Coordenadores de Curso e revelam um maior desconhecimento de outras instâncias da gestão das escolas.

Assim, e para além da participação formal dos estudantes nos órgãos de gestão, com uma maior visibilidade institucional, emergem formas de participação menos visíveis porque inscrites na sociabilidade dos estudantes e no quotidiano das relações com professores e Coordenadores de Curso. Estas últimas são provavelmente as formas de participação mais frequentes e mais significativas para os estudantes, favorecidas pelos circuitos de comunicação e de relações diretas desenvolvidas em instituições de pequena e média dimensão, como são as duas instituições integrantes deste estudo.

Esta participação informal dos estudantes, pode justificar a sua opinião sobre a existência de alguma integração dos seus contributos, sobretudo em temas como o funcionamento pedagógico, os apoios sociais, a interação com a comunidade e a organização e o funcionamento dos serviços.

Ao nível do funcionamento dos órgãos de gestão, os estudantes com cargos institucionais entrevistados consideram que são em geral bem acolhidos nos órgãos a que pertencem e que há reatividade à sua presença e às suas opiniões, o que pode indicar que as instituições tendem a criar ambientes favoráveis à participação dos estudantes.

Por outro lado, foi possível identificar um aumento significativo de estudantes que participam em debates com os colegas acerca de questões relacionadas com o funcionamento da escola e sobretudo com a pertença a grupos ou associações fora do contexto institucional, como se o que está em causa não é tanto a falta generalizada de uma atitude participativa nos vários contextos de vida dos estudantes, mas um alheamento dos modos de participação mais formais nas instituições onde estudam.

## **2. Identificação dos fatores de facilitação e constrangimentos**

Relativamente à identificação dos fatores de facilitação e aos constrangimentos às formas de participação e intervenção dos estudantes, impostas quer pelas normas, quer pelas práticas das instituições, elas encontram-se expressas na tabela seguinte.

**Quadro S26: Identificação dos fatores de facilitação e constrangimentos: resumo dos principais resultados obtidos pelos diferentes métodos**

|                  | Pesquisa documental                                                                                                                                                                                                                                                                                     | Questionário                                                                                                                                                                                                                                                                                                                                                                                                                                                                                                                                                              | Entrevista                                                                                                                                                                                                                                                                                                                                                                                                                                                                                                                                                                                                                                                                                                                                                                                                                                                                                                                                                                                                                                                                                                                                                                                                                                                                                                                                                                                                                                                                                                                                                                                                                                                                                                                                               |
|------------------|---------------------------------------------------------------------------------------------------------------------------------------------------------------------------------------------------------------------------------------------------------------------------------------------------------|---------------------------------------------------------------------------------------------------------------------------------------------------------------------------------------------------------------------------------------------------------------------------------------------------------------------------------------------------------------------------------------------------------------------------------------------------------------------------------------------------------------------------------------------------------------------------|----------------------------------------------------------------------------------------------------------------------------------------------------------------------------------------------------------------------------------------------------------------------------------------------------------------------------------------------------------------------------------------------------------------------------------------------------------------------------------------------------------------------------------------------------------------------------------------------------------------------------------------------------------------------------------------------------------------------------------------------------------------------------------------------------------------------------------------------------------------------------------------------------------------------------------------------------------------------------------------------------------------------------------------------------------------------------------------------------------------------------------------------------------------------------------------------------------------------------------------------------------------------------------------------------------------------------------------------------------------------------------------------------------------------------------------------------------------------------------------------------------------------------------------------------------------------------------------------------------------------------------------------------------------------------------------------------------------------------------------------------------|
| FACILITADORES    | 1. Maior participação dos Estudantes nos Conselhos Pedagógicos (órgão com paridade).                                                                                                                                                                                                                    | 1. Em geral, todos os fatores enunciados no questionário são valorizados por uma percentagem muito significativa de estudantes.<br>Facilitador mais valorizado descrito no questionário: resolução de problemas em interação direta com professores e funcionários (74,5%)<br>3. A interação com a comunidade é percebida como altamente integrada.<br>4. Os estudantes reconhecem que parte do seu contributo é integrado pela instituição (são, no entanto, percebidos de forma diferente nas diferentes Escolas e variam de acordo com os cursos e perfis dos alunos). | 1. Os estudantes com cargos institucionais revelam estar bem informados sobre os órgãos de gestão, não mencionando o Conselho de Gestão ou a Provedoria do Estudante.<br>2. A experiência de participação demonstrativa fora da instituição pode ser um facilitador.<br>3. A coordenação dos cursos é por todos conhecida e muitos mencionam a comissão para o acompanhamento e avaliação do curso que, de acordo com os estatutos aprovados no IPS, inclui obrigatoriamente estudantes (tal obrigatoriedade não existe no IPP).                                                                                                                                                                                                                                                                                                                                                                                                                                                                                                                                                                                                                                                                                                                                                                                                                                                                                                                                                                                                                                                                                                                                                                                                                         |
| CONSTRANGIMENTOS | 1. A participação dos estudantes nos órgãos sociais foi reduzida pela última legislação portuguesa (RJIES).<br>2. Abordar temas em reuniões sem interesse particular para os alunos leva ao distanciamento dos alunos. Isto foi mais significativo na IPP (31% em média, na IPP; 58% em média, na IPS). | 1. Constrangimentos mais valorizados descritos no questionário: falta de tempo para realizar as tarefas académicas (81,2%); falta de informação e conhecimento; desinteresse institucional e desvalorização da contribuição estudantil; desinteresse dos alunos; medo de retaliação                                                                                                                                                                                                                                                                                       | 1. Descontentamento muito pontual relativamente ao funcionamento dos órgãos em que participam: o órgão reunir mais em comissão permanente do que em assembleia.<br>2. Os estudantes sem cargos são bastante menos conhecedores da organização da sua UO e do IP, mencionando apenas o Conselho Pedagógico e a Direção da UO, do IP e a Associação Académica.<br>3. A essência participativa formal dos estudantes (órgãos e atos eleitorais) tem múltiplos fatores, nenhum deles preponderante: fatores estruturais de fundo - educação escolar e familiar que não a incentiva; necessidade de formação no curso no qual ingressaram (dos estudantes com cargos institucionais uns concordam e outros consideram tratar-se de um estereótipo); condições dos estudantes na realização dos cursos (acumulação com trabalho, transportes, horários...); fatores institucionais das IES - falhas na acesso e na divulgação da informação e reduzido impacto da informação institucional, relativamente ao funcionamento das IES, a pouca valorização destas funções e condições que podem não ser facilitadoras; fatores relacionados com os próprios estudantes e com o modo como dinamizam entre eles esta assunção de cargos (tendência para quem assume um cargo institucional vir a assumir também outros) que tende a privilegiar conhecimentos já existentes e relações de amizade estabelecidas, o que pode sugerir que há pouco lugar para os "novos".<br>4. Falta e falhas na prestação de informação institucional; pouco valor atribuído às tarefas de participação; pouca rotação de posições.<br>5. Destaca-se também (50-60%) nas entrevistas a falta de conhecimentos necessários à tarefa (e sentem que a Instituição também o considera). |

Quanto aos fatores de promoção e de limitação da participação dos estudantes, considera-se importante assinalar que, contrariando o discurso europeu de reconhecimento do papel dos estudantes no desenvolvimento das IES, a última revisão do RJIES (2007) reduziu o número de representantes dos estudantes nos órgãos de gestão das IES, dando-se assim um sinal contrário ao que se tem estabelecido no processo de construção do EHEA. De facto, embora os Conselhos Pedagógicos se tenham mantido como órgãos paritários de estudantes e docentes, com o novo RJIES, a percentagem de estudantes nos órgãos colegiais representativos com as competências de eleger o Presidente ou o Reitor e de aprovar

os planos de atividades e o orçamento reduziu-se para 15%, quando na anterior legislação (Lei 54/90 e Lei n.º 108/88), estes órgãos incluía até 50% de estudantes nas Universidades e até 35% no caso dos Politécnicos.

Assim, a legislação que em Portugal enquadra a estrutura de funcionamento e de gestão das IES evidencia uma desvalorização do papel dos estudantes através de um número reduzido dos respetivos representantes nos órgãos de gestão, com a exclusão dos Conselhos Pedagógicos. Configura-se, assim, um contexto em que a participação minoritária dos estudantes nos órgãos de gestão das IES poderá ser relacionada com o desinteresse dos estudantes e conduzir à percepção de que a sua opinião não é tida em conta, o que se manifesta na reduzida participação dos estudantes nos atos eleitorais desses órgãos. Tal é evidenciado neste estudo, embora se registre uma diferença significativa entre os níveis de participação das duas instituições, o que poderá remeter para características próprias que não se conseguiram deifrar neste estudo.

As percentagens de participação nas votações, embora reduzidas, aumentam nas eleições dos órgãos das escolas de menor dimensão do IPSetúbal, o que poderá indicar um maior interesse dos estudantes devido à maior proximidade com o funcionamento dos órgãos neste âmbito e com características próprias de cada escola. No IPPortalegre não se verificou esta relação com a dimensão da escola.

também as opiniões dos estudantes sobre o modo como as respetivas instituições integram os seus contributos apresentam diferenças significativas entre as várias escolas, assinalando a importância de fatores relacionados com as características de cada escola, curso e ano/curso, como contextos diferenciados que facilitam ou dificultam em maior ou menor grau a participação dos estudantes, nomeadamente em função das suas diferentes dimensões, entre outras características de funcionamento, permitindo em maior ou menor grau, uma relação direta e facilitada entre todos os elementos da comunidade académica, possibilitando processos de influência e de relação direta entre estudantes e entre estudantes e docentes para uma maior participação na vida das escolas, como é referido por alguns dos estudantes entrevistados.

Igualmente se verificou, como já se referiu atrás, uma redução da participação dos estudantes nas eleições para os órgãos globais dos institutos, designadamente os Conselhos Gerais, possivelmente pelo maior distanciamento das temáticas aí tratadas. De facto, a análise feita aos assuntos tratados nas reuniões dos Conselhos Gerais evidenciou temas que não têm uma relação direta com as preocupações dos estudantes e que estes têm mais dificuldade em compreender. Nas entrevistas realizadas são referidos temas menos interessantes para os estudantes e em que estes se sentem menos à vontade para intervir, como os relacionados com os mapas de pessoal e com os seus impactos orçamentais. A situação minoritária em que os estudantes se encontram nestes órgãos, ao contrário dos órgãos paritários como os Conselhos Pedagógicos, reforça a percepção pelos estudantes de uma menor valorização das suas opiniões levando à sua desmotivação em relação a uma maior participação nas votações e nas reuniões desses órgãos.

Porém, mesmo nos órgãos em que os estudantes têm um maior número de representantes, os estudantes entrevistados enunciam os motivos de algum descontentamento e que se centram na falta de seguimento de problemas identificados em algumas UC e com alguns docentes ou com condições de funcionamento relacionadas com horários e instalações. Parece-se que estes são exemplos de temas mais interessantes para os estudantes, relativamente aos quais

esperam a sua discussão e a adoção de medidas para a resolução de problemas identificados no seu âmbito.

Nas respostas ao questionário quanto aos fatores de facilitação/promoção da participação dos estudantes, evidencia-se a importância atribuída à generalidade dos fatores enunciados, sem diferenças muito significativas entre si, pelo que se pode afirmar o caráter multidimensional dos fatores da participação, o que terá efeitos óbvios na definição de estratégias institucionais neste âmbito. Esse caráter multidimensional também foi verificado nos fatores de limitação/impedimento, embora haja uma maior diversidade dos níveis de importância que lhes são atribuídos.

Há que assinalar a importância da falta de disponibilidade para participarem devido à necessidade de cumprirem as tarefas escolares, que surge de forma evidente como o principal fator de limitação da participação dos estudantes. Este aspeto é reforçado nas entrevistas realizadas pela expectativa dos estudantes e das suas famílias relativamente à prioridade que devem dar aos seus estudos e à necessidade de terminarem os cursos com a maior brevidade possível e que uma maior participação institucional ou na AA significa o prolongamento da frequência do curso. A disponibilidade dos estudantes para participarem parece também ser afetada pelos tempos elevados de deslocação casa-escola. Por outro lado, a possibilidade que os estudantes têm de resolver os seus problemas informalmente com os professores e com os serviços reduz a necessidade do recurso a uma participação mais formal nos órgãos de gestão.

Considerarem que não têm os conhecimentos necessários e sentirem que a Instituição também o considera, a falta e a qualidade da informação sobre a instituição são também fatores de limitação valorizados pelos estudantes. Nas entrevistas, os estudantes referem-se à falta de informação e à inadequação dos meios de informação mais utilizados para mobilizar dos estudantes, como um fator desmotivador para uma maior participação nos atos eleitorais. As falhas na acesão e na divulgação da informação também são referidas como fator de limitação da participação dos estudantes, de forma mais afirmativa pelos estudantes sem cargos institucionais, enquanto os estudantes com cargos nos órgãos de gestão expressam estarem informados sobre o funcionamento institucional. A inexistência de comunicação dos estudantes com os seus representantes nos órgãos de gestão e o facto de frequentemente só haver uma lista candidata é também um fator de desinteresse dos processos eleitorais.

As respostas quanto aos níveis de integração institucional dos contributos dos estudantes e quanto aos fatores que facilitam/promovem a sua participação, apresentam alguma diversidade entre as diversas escolas e já anteriormente se realçaram os diferentes níveis de participação dos estudantes nos atos eleitorais nas diferentes escolas, parecendo esse facto assoçiar-se à maior participação nas escolas mais pequenas, pelo menos no que se refere ao IPSetúbal. No entanto, a dimensão da escola não parece ser um fator discriminante nas respostas obtidas relativamente à integração dos contributos dos estudantes nem aos fatores de facilitação/promoção, pelo que seria interessante a identificação das características desses contextos de uma forma mais abrangente e na sua relação com a diversidade de níveis e formas de participação dos estudantes. Porém, nas entrevistas a estudantes do IPPortalegre, registou-se a referência às experiências de participação democrática dos estudantes na relação com as características do meio onde vivem, em que experiências diversificadas em associações locais, nomeadamente no âmbito do Ensino Secundário, reforça a participação no contexto do Ensino Superior.



Menos valorizados pelos estudantes do que os fatores já referidos, mas ainda assim com níveis de valorização bastante significativos, há que realçar fatores como o desinteresse dos estudantes em participar, o receio de represálias, os fatores pessoais, familiares e profissionais, a falta de um incentivo, nomeadamente por parte das AA, e de um pedido ou convite para participar. A este propósito, os estudantes entrevistados que não desempenham um cargo exprimem a opinião que a possibilidade de se ter um cargo institucional não lhes é acessível por serem apenas destinadas a alguns colegas, assinalando algum fechamento dos estudantes mais participativos e que se complementa com a ideia da interferência político-partidária como geradora de alguma (auto)exclusão dos não têm cargos, pela diferença nos interesses e no nível do discurso, mais elaborado e politizado.

Nas entrevistas realizadas, ressalta, ainda, a ideia de uma grande diferença entre os estudantes que assumem cargos institucionais e os que não os assumem em termos de informação e consciência cívica. Esta diferença entre perfis mais e menos participativos cria mecanismos de reprodução na ocupação de cargos em que quem assume um cargo institucional tende a vir a assumir também outros, o que gera a ideia de que há um pequeno núcleo de estudantes a assumir este tipo de funções e que as vão “rodando” entre eles. Esta lógica tem como efeito a tendência para que a ocupação dos cargos seja determinada sucessivamente por estudantes que já se conhecem e que de algum modo estabelecem relações de amizade, criando a ideia de que não são cargos acessíveis a todos e que a escolha acaba por acontecer dentro de um núcleo restrito. Contudo, há casos que demonstram que um estudante conseguiu por si próprio fazer uma lista e ser eleito sem esse efeito “sucessório”.

### **3. Perspetivas dos estudantes sobre a sua participação na governação das IES**

Finalmente, procede-se à apresentação das perspetivas dos estudantes sobre a sua participação na governação das instituições em que se encontram matriculados. Relativamente a esta análise, não foi incluída a pesquisa documental, uma vez que ela não possibilita qualquer informação sobre o tema.

**Quadro S27 - : Análise das perspectivas dos estudantes sobre a sua participação na governação das IES: resumo dos principais resultados obtidos pelos diferentes métodos**

| Questionário                                                                                                                                                                                                                                            | Entrevista                                                                                                                                                                                                                                                                                                                                                                                                                                                                                                                                                                                                                                                                                                                                                                                                                                                                                                                                                                                                                                                                                                                                                                                                                                                                                                                                                                                                                                                                                                                                                                                                                                                                                                                                                                                                                                          |
|---------------------------------------------------------------------------------------------------------------------------------------------------------------------------------------------------------------------------------------------------------|-----------------------------------------------------------------------------------------------------------------------------------------------------------------------------------------------------------------------------------------------------------------------------------------------------------------------------------------------------------------------------------------------------------------------------------------------------------------------------------------------------------------------------------------------------------------------------------------------------------------------------------------------------------------------------------------------------------------------------------------------------------------------------------------------------------------------------------------------------------------------------------------------------------------------------------------------------------------------------------------------------------------------------------------------------------------------------------------------------------------------------------------------------------------------------------------------------------------------------------------------------------------------------------------------------------------------------------------------------------------------------------------------------------------------------------------------------------------------------------------------------------------------------------------------------------------------------------------------------------------------------------------------------------------------------------------------------------------------------------------------------------------------------------------------------------------------------------------------------|
| <p>1. Os estudantes valorizam a participação: em média, 90% consideram-na importante ou muito importante.</p> <p>2. Baixa participação em estruturas formais devido à importância dada aos conteúdos pessoais na resolução de problemas académicos.</p> | <p>1. Os alunos que ocupam cargos estão, em geral, satisfeitos com as funções que desempenharam e com a forma como o fizeram</p> <p>2. Relativamente à informação, as sugestões não são muito consonantes. Uma parte dos estudantes considera que a informação se deve direcionar cada vez mais para uma digitalização mais próxima dos fóruns jovens, abandonando os formatos tradicionais que recorrem ao papel e ao correio eletrónico institucional, sugerindo que se passe a utilizar as redes sociais que se podem facilmente consultar no telemóvel. Contudo, outros estudantes parecem valorizar uma comunicação institucional de maior proximidade, por exemplo através de sessões de informação durante o ano, preferencialmente feitas por outros estudantes, ou mesmo nas aulas com os docentes</p> <p>3. Os estudantes consideram que a forma como as instituições concebem e divulgam a informação é inadequada.</p> <p>4. As formas de organização e trabalho dentro dos órgãos podem ser ainda melhoradas, embora não sejam objeto de forte crítica. A melhoria passa pela organização das agendas de forma aos estudantes compreenderem melhor os assuntos em discussão e pela forma de publicação daquilo que o órgão realiza, seja através de atas ou de outras modalidades mais apelativas e menos formais</p> <p>5. Alguns estudantes valorizam a participação em projetos institucionais (Eco Escolas, por exemplo), em projetos de investigação, em iniciativas do IP (semanas abertas, por exemplo) e/ou dinâmicas de curso e/ou de unidades curriculares (ou mesmo individuais) junto da comunidade (campanhas solidárias, apoio a instituições comunitárias).</p> <p>6. A interação direta influencia as perspectivas dos alunos sobre a necessidade de participar dos órgãos institucionais e sobre seu papel neles.</p> |

Os estudantes entrevistados com cargos na instituição confirmam esta valorização da sua participação institucional e/ou na AA, não apenas pelos seus contributos e na representação dos interesses dos estudantes, permitindo que a “voz dos estudantes” seja ouvida nas instituições, mas também como experiências que lhes permitem adquirir novos conhecimentos e que são fonte do desenvolvimento de competências sociais e pessoais, considerando que essas *soft skills* lhes irão ser muito úteis no futuro em várias esferas da sua vida, quer ao nível pessoal, quer profissional. Salientam a oportunidade da partilha e discussão de experiências e de perspectivas com colegas e com professores. Estes estudantes estão em geral satisfeitos com as funções que exercem, e com o modo como o fazem, considerando que tiveram impacto no órgão do qual fizeram parte.

## CAPÍTULO SÉTIMO

### SÍNTESE INTERPRETATIVA E DISCUSSÃO

O estudo partiu do reconhecimento da importância da participação dos estudantes na governação das IES no quadro atual da construção do EHEA. Neste contexto de reorganização do ES, os estudantes são considerados atores-chave na governação e *stakeholders* no âmbito dos processos da garantia da qualidade.

Paralelamente, enquanto protagonistas dos processos de gestão das IES, a experiência e a intervenção dos membros da equipa deste estudo, a diferentes níveis, assentam numa valorização da participação dos estudantes e numa efetiva escuta das suas apreensões e propostas, como um contributo essencial para a melhoria da qualidade das instituições. No entanto, no âmbito da atividade institucional em função dos diferentes cargos ocupados, têm vindo a observar dificuldades de mobilização dos estudantes para a participação nos órgãos de gestão e das associações académicas, quer na constituição de listas de candidatura e na reduzida participação nos atos eleitorais quer na participação nas reuniões e nas atividades inerentes ao exercício dos cargos.

O questionamento desta realidade sentida no quotidiano das nossas instituições foi um ponto de partida essencial para este estudo. O mesmo teve início com uma pesquisa sobre a situação da participação dos estudantes em outros contextos e sobre a relação desta situação com o quadro político-educativo europeu a que Portugal pertence. Sendo que este quadro é, no domínio dos princípios, integrador e promotor da participação enquanto valor essencial da construção do EHEA (EHEA, 2018), há indícios de que na prática tal não está a acontecer de forma satisfatória (ESU, 2018). Para efeitos do estudo, entende-se por participação dos estudantes a intervenção destes na tomada de decisão com capacidade influente, em assuntos que lhe dizem respeito (Conselho da Europa, 2003).

Estas questões definiram os três eixos de análise da investigação: a caracterização da participação dos estudantes nos órgãos de governo das IES em que têm assento e nas associações estudantis, ao longo dos últimos cinco anos; o aprofundamento da compreensão sobre as condições que se apresentam como fatores facilitadores ou constrangedores da participação; a análise das perspetivas e perceções dos estudantes sobre a sua própria participação.

Após a recolha e análise de dados efetuada pelas três técnicas de investigação utilizadas e da análise cruzada dos respetivos resultados, emergem como salientes três questões que a seguir se discutem e que fornecem a base para as propostas e recomendações do estudo.

## 1. A fraca participação nos processos de constituição e de intervenção nos órgãos institucionais

Como atrás referido, as disposições legais em vigor no atual RJIES (2007) reduzem de forma significativa a representação dos estudantes nos órgãos de gestão das IES, relativamente à anterior legislação. Tal sinaliza uma efetiva desvalorização da participação dos estudantes, constituindo-os como grupo minoritário, sobretudo nos casos dos Conselhos Gerais e de Representantes. Comprometendo a capacidade de propor um agendamento dos assuntos mais de acordo com as questões sentidas pelos seus pares e a capacidade de fazer valer as suas perspetivas próprias, o reduzido número de estudantes nestes órgãos impede na prática o exercício de uma participação com impacto na governação (Klemenčič, 2012). Os dados da investigação mostram que a generalidade dos temas tratados nas reuniões não são do interesse direto dos estudantes, razão que leva à desmotivação para uma maior participação institucional, como também revelam os dados obtidos. Pode, assim, concluir-se que o artículado da norma legal não está em sintonia com os princípios enunciados sobre a consideração dos estudantes como parceiros da governação.

Na verdade, em termos quantitativos, os estudantes não têm condições de participação idênticas às dos outros *stakeholders*. Se relacionarmos este aspeto com outros dados que referem como obstáculos à participação as lacunas de informação institucional, podemos concluir que, além de os representantes dos estudantes não terem oportunidade de participar na definição das agendas das reuniões, também a generalidade dos estudantes não tem acesso às próprias agendas anteriormente às reuniões e também, dificilmente, tem acesso às deliberações em tempo útil. Se acrescentarmos, ainda, a falta de conhecimentos e preparação dos estudantes para exercer os cargos com competência, igualmente assinalada, podemos concluir que a capacidade de participação nestes importantes fóruns de decisão está significativamente desequilibrada em relação aos poderes e influência de outros membros que ocupam neste contexto lugares predominantes na hierarquia de atores (Muller, 1995).

Adicionalmente, surgem outros fatores desmobilizadores da participação, tais como a falta de incentivos, pois, quando os há, especialmente por parte dos pares, os estudantes afirmam que são mais facilmente levados a participar. Igualmente, o desinteresse e a desvalorização da participação por parte da instituição parecem ter um papel importante. Assim, os dados permitem confirmar como fator promotor da participação um contexto composto e interativo constituído pelo quadro político, a cultura institucional e o contexto pessoal dos estudantes.

## 2. As diferentes formas e perceções da participação

Em contraste com a fragilidade da participação dos estudantes no funcionamento dos órgãos e dos seus processos eleitorais, quer pela sub-representação dos estudantes na sua constituição, quer pelo manifesto desinteresse nos processos eleitorais e no

acompanhamento das suas atividades, verifica-se que a participação não só é valorizada por parte dos estudantes, como é mesmo uma realidade institucional. Inclui-se aqui a participação em projetos institucionais, de investigação e outras iniciativas, dinâmicas de curso e/ou de unidades curriculares junto da comunidade e sobretudo o contacto direto para a resolução de problemas. Estas diversas formas e contextos de participação, para além dos órgãos de gestão e das associações académicas, parecem disseminar-se nas relações que se estabelecem entre os estudantes, com os professores nas UC e com os coordenadores/diretores de curso.

Este tipo de intervenção que os estudantes mencionam quando são questionados sobre as razões da pouca participação nos órgãos, e que alguns usam para justificar a não necessidade da mesma, em contra de certo modo e do no estudo desenvolvido no âmbito do projeto STUPS (Costa *et. al*, 2020). Como atrás referido, a sala de aula surge nas respostas ao questionário mencionado no estudo como um espaço de intervenção, embora com menos peso do da intervenção no âmbito da respetiva Associação Académica. A reflexão sugerida por este entendimento de participação apresenta aspetos que podem ser abordados em relação com outros dados desta investigação os quais surgem associados a constrangimentos sobretudo de ordem pessoal, mas também de ordem institucional e especificamente pedagógica, que são mencionados quer através das entrevistas quer dos questionários. Além do desinteresse pessoal pela participação nos órgãos, surgem como obstáculos a indisponibilidade devido à necessidade do cumprimento das tarefas do estudo, o tempo despendido nas deslocações casa-escola, as pressões familiares para terminar rapidamente o curso e atividades profissionais que não deixam tempo para atividades não diretamente ligadas ao curso.

Por outro lado, muitos estudantes não consideram que a pouca participação constitua um problema, pelo contrário, acham que o contacto individual com os professores e/ou com os serviços é a melhor forma de resolver os problemas que os afetam. A participação é, pois, aqui encarada como uma forma de resolver problemas pessoais. Enquadrando esta questão no âmbito da garantia da qualidade, importa estabelecer até que ponto esta é uma forma eficaz de satisfazer necessidades e interesses deste grupo de *stakeholders*. Pode na verdade funcionar, caso os professores e os serviços sejam reativos. A pergunta óbvia é: e se não forem? Não deixa de ser relevante introduzir a este propósito um outro fator de constrangimento à participação já identificado em publicações anteriores (ESU, 2018; Palma, 2020) e confirmado por esta investigação, o medo de represálias. O medo de represálias que surge no discurso dos estudantes, pode efetivamente levar à inibição de colocar problemas por receio de possíveis efeitos perniciosos na avaliação por parte dos docentes,olidindo com o desejo dos estudantes de acabarem o curso. Esta forma de participação que tem como premissa positiva a relação de proximidade entre estudantes, professores e funcionários, não tem, em si mesma, o caráter de participação com impacto na tomada de decisão, como é aliás reconhecido pelos representantes dos estudantes ao nível europeu, ao afirmarem que a participação não é apenas um instrumento de apresentação de queixas, mas um modo fundamental de moldar a aprendizagem e a sociedade do futuro (ESU, 2020, p. 14). Tendo este objetivo em mente, impõe-se uma

reflexão sobre se e como poderá ser possível passar do plano individual e de sala de aula, onde os estudantes se sentem, em princípio, mais disponíveis para um diálogo sobre o seu processo de aprendizagem, para o plano institucional onde as decisões são tomadas.

### 3. O efeito constrangedor de fatores de ordem pessoal e institucional à participação

Esta investigação, situada em duas IES, tem um foco institucional que importa sublinhar. Foi bastante evidente como a cultura institucional pode constituir um elemento constrangedor da participação. O aspeto mais saliente que emerge é o conjunto de falhas na informação e na comunicação. São apontadas falhas no conteúdo e na disponibilização da informação sobre a organização, o funcionamento dos órgãos e as suas funções, bem como sobre todos os processos que conduzem à eleição de representantes de que em geral os estudantes se sentem alheados. Paralelamente, os estudantes vivem no desconhecimento da atividade regular dos órgãos, não refletindo nem contribuindo minimamente para as decisões dos mesmos. A sala de aula e o contexto da turma parecem ser o epicentro da atividade estudantil, que emergem como satisfatórios em termos de solidabilidade e apoio, mas que aparecem desconectados do resto da comunidade.

Os dados permitem, assim, concluir que o ambiente das IES não assegura as condições de participação para o desenvolvimento de um projeto institucional em parceria, integrador das perspetivas dos estudantes, que lhes permita influenciar a decisão política. Pelo contrário, o ambiente descreito acentua as limitações pessoais que os estudantes mencionam e que são apresentadas a seguir, pela ordem da sua relevância:

- a indisponibilidade devido à necessidade do cumprimento das tarefas escolares e ao tempo despendido nas deslocações casa-escola;
- a eficácia do contacto individual com os professores e/ou com os serviços como forma de resolução dos problemas que os afetam;
- a falta de conhecimento / informação;
- o desinteresse/desvalorização da instituição relativamente ao contributo dos estudantes;
- o desinteresse dos estudantes;
- o receio de represálias;
- os fatores pessoais, familiares e profissionais;
- a falta de um incentivo, nomeadamente por parte das associações académicas e de um pedido ou convite para participarem;
- uma menor integração institucional dos contributos dos estudantes de Mestrado e de Licenciaturas pós-laborais, o que indica a necessidade de uma maior capacidade de resposta das instituições às suas especificidades.

## 4. Recomendações

O conhecimento construído no desenvolvimento deste estudo, para além do seu valor intrínseco, projetava-se na necessidade e possibilidade deste maior conhecimento sobre as formas e os fatores da participação dos estudantes se traduzir na enunciação de propostas de intervenção que possam contribuir para a melhorar.

Após uma análise final dos resultados da investigação, foi possível chegar a um conjunto de recomendações com vista a assegurar as condições de participação dos estudantes, tendo em conta a multidimensionalidade dos fatores identificados.

- Introduzir alterações no RJIES (2007) de forma a eliminar ou reduzir a incongruência entre a valorização da participação dos estudantes ao nível europeu e a redução da sua representação nos órgãos de gestão das IES nacionais. A alteração da representação dos estudantes já proposta pelo movimento associativo português considera-se adequada a este propósito, mas consideramos que se pode ir mais além e assegurar uma presença dos estudantes em outros órgãos estratégicos e executivos ao nível das unidades orgânicas, a definir com as associações académicas;
- Ao nível institucional, organizar as agendas das reuniões dos órgãos de gestão ouvindo os estudantes para que se possam preparar e compreendam melhor os assuntos em discussão e para que possam eles próprios contribuir com propostas de temas a abordar.
- Disponibilizar informação sobre toda a atividade institucional, incluindo a orgânica, o funcionamento, as agendas, atas e deliberações dos órgãos, pesquisando com os estudantes, modalidades mais apelativas e menos formais. Uma comunicação institucional baseada no papel ou no correio eletrónico institucional revelaram-se formas pouco apelativas e pouco mobilizadoras dos estudantes. Assim, justifica-se repensar as modalidades de informação mais adequadas aos públicos a que se destinam, ponderando-se formas alternativas de comunicação mais baseadas nas redes sociais e sobretudo assentes numa comunicação de proximidade nas turmas e nos cursos.
- A sugestão dos estudantes entrevistados da divulgação das listas de estudantes candidatos aos órgãos de gestão incluir as respetivas fotografias pode ser um contributo interessante e mais motivador para um aumento do número de votantes.
- Tendo em conta as formas de participação informal que os estudantes mençam, pensa-se que será possível e desejável adotarem-se formas de articulação entre estas modalidades de participação informal dos estudantes ao nível de UC/turma/curso com as estruturas formais de gestão das IES, sucessivamente do nível das comissões de acompanhamento dos cursos até aos Conselhos Pedagógicos aos Conselhos de Representantes e aos Conselhos Gerais. As associações académicas podem ter também um papel nesta dinâmica de funcionamento de "vai e vem" num *continuum* entre o nível da base onde se situam os estudantes e os professores e o nível do topo onde se situam as presidências dos órgãos. Pode-se admitir que esta rutura com um modelo de funcionamento habitual "top – down", pode vir a reforçar a

articulação e a redução da distância entre representantes e representados, dinamizando-se e dando-se visibilidade à participação dos estudantes nos diferentes níveis das instituições e alimentando o funcionamento dos órgãos com questões com mais sentido para os estudantes. Esta dinâmica pode permitir reequilibrar as estruturas e o funcionamento dos Sistemas de Gestão e Garantia da Qualidade pela maior articulação entre os níveis onde ocorre a participação dos atores com os da gestão da qualidade.

Finalmente, e porque as IES são instituições educativas e os sistemas de garantia da qualidade reconfiguram os estudantes como protagonistas dos seus processos de aprendizagem, impõe-se como missão institucional a formação para a participação e cidadania, colocando o/a estudante no centro do processo de aprendizagem, promovendo o conhecimento sobre o funcionamento democrático da organização e a circulação da informação institucional. Adicionalmente, é imperioso promover competências adequadas à participação, tais como, o sentido crítico e auto-crítico, o sentido do coletivo plural e a capacidade de trabalhar em grupo, a análise e resolução de problemas e competências argumentativas robustas. Além disso, a participação enquanto valor democrático inquestionável deve estar presente no ambiente institucional e constituir uma missão pedagógica primordial, visando a construção de um futuro integrador das perspectivas dos estudantes de hoje que serão profissionais e cidadãos amanhã. Em suma, organizar o projeto pedagógico em parceria com os estudantes.



## REFERÊNCIAS BIBLIOGRÁFICAS

Alves, Mariana G. (2020). A (in)visibilidade do trabalho docente dos académicos. *Revista TMQ Techniques, Methodologies and Quality*, 1, 57-68. <https://publicacoes.rigual.org/edesp1-20-57-68/>

Balsa, Casimiro, Simões, José Alberto, Nunes, Pedro, Carmo, Renato e Campos, Ricardo (2001), *Perfil dos estudantes do Ensino Superior: Desigualdades e diferenciação*. Lisboa: Edições Colibri.

Boussaguet, L. Forums. In L. Boussaguet, S. Jacquot & P. Ravinet (Eds.), *Dictionnaire des politiques publiques* (5<sup>e</sup> ed.), Presses de Sciences Po, 2019; pp. 273-278

Bradley, L.H. (1993). *Total quality management for schools*. Lancaster, PA: Technomic. BRYMAN, Alan, 2012, *Social research methods*. 4th. Oxford: Oxford University Press. ISBN 978-0019-958805-3. BRYMAN, Alan, 2012, *Social research methods*. 4th. Oxford: Oxford University Press. ISBN 978-0019-958805-3.

Commaille, Jacques (2019). Sociologie de l'action publique. In Laurie Boussaguet, Sophie Jacquot & Pauline Ravinet (Eds.), *Dictionnaire des politiques publiques* (5<sup>e</sup> ed.) (pp. 576-584). Presses de Sciences Po.

Conselho Nacional de Educação (2022). Recomendação 4/2022, Participação dos jovens no ensino superior. junho 2022.

Council of Europe (2003) Revised European Charter on the Participation of Young People in Local and Regional Life. Microsoft Word - Charter for youth participation.doc (salto-youth.net)

Costa, Casas Novas & Silva, (2020). Participação estudantil (sem fronteiras)? Perceções, potencialidades e obstáculos em contexto de ensino superior. 10.<sup>a</sup> Conferência Forges, O ensino superior na era digital nos países e regiões de língua portuguesa: desafios e propostas. [https://dspace.uevora.pt/rdpc/bitstream/10174/30291/1/Forges2020\\_Costa\\_et\\_al.pdf](https://dspace.uevora.pt/rdpc/bitstream/10174/30291/1/Forges2020_Costa_et_al.pdf)

Declaração de Yerevan (2015). Conferência de Ministros responsáveis pelo Ensino Superior, de 14 - 15 de maio. [http://www.ehea.info/media.ehea.info/file/2015\\_Yerevan/70/7/YerevanCommuniqueFinal\\_613707.pdf](http://www.ehea.info/media.ehea.info/file/2015_Yerevan/70/7/YerevanCommuniqueFinal_613707.pdf)

Delvaux, Bernard (2009). Qual é o papel do conhecimento na acção pública? *Educação & Sociedade*, 30(109), 959-985. <https://doi.org/10.1590/S0101-73302009000400003>

Djelic, Marie L. & Sahlin-Andersson, Kerstin (Eds.). (2006). *Transnational governance: Institutional dynamics of regulation*. Cambridge University Press.

ENQA (2018). ENQA message to Ministers Responsible for Higher Education in the EHEA. Paris Ministerial Conference, May 2018. Retrieved from: [http://ehea.info/media.ehea.info/file/2018\\_Paris/57/6/ENQA\\_report\\_Paris\\_2018\\_947576.pdf](http://ehea.info/media.ehea.info/file/2018_Paris/57/6/ENQA_report_Paris_2018_947576.pdf)

ESG. Standards and Guidelines for Quality Assurance in the European Higher Education Area. (2015). Brussels, Belgium

ESIB (2003). Bologna with Student Eyes 2003. Retrieved from: <http://www.ehea.info/page-bologna-with-student-eyes>.

European Association of Institutions in Higher Education. (2015). *Standards and guidelines for quality assurance in the European higher education area (ESG)*. EURASHE. [https://www.enqa.eu/wp-content/uploads/2015/11/ESG\\_2015.pdf](https://www.enqa.eu/wp-content/uploads/2015/11/ESG_2015.pdf)

European Council (2000). Conselho Europeu Extraordinário de Lisboa (Março de 2000: para uma Europa da inovação e do conhecimento. Conselho Europeu extraordinário de Lisboa (Março de 2000): para uma Europa da inovação e do conhecimento

European Higher Education Area, EHEA, (2018): Paris Communiqué. Paris, May 25th 2018. Retrieved from <http://www.ehea.info/page-ministerial-conference-paris-2018>

European Students' Union (2015), *Bologna with Student Eyes 2015: Time to meet the expectations from 1999*. ISBN 978-94- 91256-01-1, Retrieved from: <https://www.esu-online.org/wp-content/uploads/2016/07/BWSE-2015-online.pdf>.

European Students' Union (2018), *Bologna with Student Eyes 2018: The final countdown*. ISBN 978-94-91256-05-9, Retrieved from: [https://www.esu-online.org/wp-content/uploads/2019/02/BWSE-2018\\_web\\_Pages.pdf](https://www.esu-online.org/wp-content/uploads/2019/02/BWSE-2018_web_Pages.pdf).

ESU, 2013 Quest for quality for students Institutional Analysis Brussels, October 2013 by the European Students' Union ESU. Institutional Analysis, Volume II.2 ([esu-online.org](http://esu-online.org))

European Students' Union. (2018). *Bologna with student eyes 2018: The final countdown*. [https://www.esu-online.org/wp-content/uploads/2019/02/BWSE-2018\\_web\\_Pages.pdf](https://www.esu-online.org/wp-content/uploads/2019/02/BWSE-2018_web_Pages.pdf)

European Students' Union. (2020). *Bologna with student eyes 2020*. 0037-Bologna-Publication-2021-WEB3.pdf ([esu-online.org](http://esu-online.org))

Foster, David, & Jonker, Jan (2003). Third generation quality management: The role of stakeholders in integrating business into society. *Managerial Auditing Journal*, 18(4), 323-328.

Freeman, R.E. (1984). *Strategic management: a stakeholder approach*. Boston: Pitman. (13) (PDF) Student participation in Higher Education Governance and Institutional Quality.

Gornitzka, A. (2010). Bologna in Context: a horizontal perspective on the dynamics of governance sites for a Europe of Knowledge. *European Journal of Education*, 45(4), 535-548

ISO 9004. (2009). *Managing for the sustained success of an organization - A quality management approach*. Geneva: International Organization for Standardization.

Jobert, B. (Ed) (1994). *Le tournant néo-libéral en Europe. Idées et recettes dans les pratiques gouvernementales*. Paris: L'Harmattan

Jobert, Bruno (2004). Une approche dialectique des politiques publiques: L'héritage de l'État en action. *Pôle Sud*, 21(2), 43-54. <https://doi.org/10.3917/psud.021.0043>

Jobert, Bruno, & Muller, Pirre (1987). *L'état en action: Politiques publiques et corporatismes*. Presses Universitaires de France. <https://gallica.bnf.fr/ark:/12148/bpt6k4805371c/f11.item.texteImage>

Klemenčič, M. (2012). The Changing Conceptions of Student Participation in HE Governance in the EHEA. In: Curaj, A., Scott, P., Vlasceanu, L., Wilson, L. (eds) *European Higher Education at the Crossroads*. Springer, Dordrecht. [https://doi.org/10.1007/978-94-007-3937-6\\_34](https://doi.org/10.1007/978-94-007-3937-6_34)

Lawrence & McCollough, 2001 A conceptual framework for guaranteeing higher education. September 2001 *Quality Assurance in Education* 9(3):139-152

DOI: 10.1108/09684880110399103

Lei nº 1/2003, de 6 de janeiro

Lei nº 108/88, de 24 de setembro

Lei 54/90, de 5 de setembro

Lei n.º 38/2007, de 16 de agosto

Lei n.º 62/2007, de 10 de setembro (RJIES)

Lima, L., Azevedo, M.L.N. & Catani, A.M. (2008). O Processo de Bolonha, a avaliação da educação superior e algumas considerações sobre a "universidade nova". *Avaliação*, 13(1), 7-36.

Ministers Responsible for Higher Education “Realising the European Higher Education Area”. Communiqué of the Conference of Ministers responsible for Higher Education in Berlin on 19 September 2003. 2003\_Berlin\_Communique\_English\_577284.pdf (ehea.info)

Ministers Responsible for Higher Education. (2010). *Budapest Vienna Declaration on the European Higher Education Area*.  
[http://media.ehea.info/file/2010\\_Budapest\\_Vienna/64/0/BudapestVienna\\_Declaration\\_598640.pdf](http://media.ehea.info/file/2010_Budapest_Vienna/64/0/BudapestVienna_Declaration_598640.pdf)

Ministers Responsible for Higher Education. (2012). *Making the Most of Our Potential: Consolidating the European Higher Education Area. Bucharest Communiqué*.  
[http://www.ehea.info/Upload/document/ministerial\\_declarations/Bucharest\\_Communique\\_2012\\_610673.pdf](http://www.ehea.info/Upload/document/ministerial_declarations/Bucharest_Communique_2012_610673.pdf)

Ministers Responsible for Higher Education. (2018). *ENQA message to Ministers Responsible for Higher Education in the EHEA*.  
[http://ehea.info/media.ehea.info/file/2018\\_Paris/57/6/ENQA\\_report\\_Paris\\_2018\\_947576.pdf](http://ehea.info/media.ehea.info/file/2018_Paris/57/6/ENQA_report_Paris_2018_947576.pdf)

Ministers Responsible for Higher Education. (2009). *The bologna process 2020: The European Higher Education Area in the new decade: Communiqué of the conference of European Ministers Responsible for Higher Education, Leuven and Louvain-la-Neuve, 28-29 April 2009*.  
[http://www.ehea.info/Upload/document/ministerial\\_declarations/Leuven\\_Louvain\\_la\\_Neuve\\_Communique\\_April\\_2009\\_595061.pdf](http://www.ehea.info/Upload/document/ministerial_declarations/Leuven_Louvain_la_Neuve_Communique_April_2009_595061.pdf)

Ministers Responsible for Higher Education. (2001). *Towards the European higher education Area. Communiqué of the meeting of European Ministers in charge of Higher Education in Prague on May 19th, 2001*.  
[http://www.ehea.info/Upload/document/ministerial\\_declarations/2001\\_Prague\\_Communique\\_English\\_553442.pdf](http://www.ehea.info/Upload/document/ministerial_declarations/2001_Prague_Communique_English_553442.pdf)

Moutsios, S. (2013). The de-Europeanization of the university under the Bologna Process. *Thesis Eleven*, 119(1), 22-46. doi:10.1177/0725513613512198

Mounk, Y. (2019). *The People vs. Democracy: Why Our Freedom Is in Danger and How to Save It*. Harvard: Harvard University Press.

Muller, P. (1995). Les politiques publiques comme construction d'un rapport au monde. In A. Faure, G. Pollet & P. Warin, (Eds.), *La Construction du Sens dans les Politiques Publiques* (pp. 153-179). Paris: L'Harmattan.

Pais, José Machado (2003), *Culturas juvenis*. Lisboa: Imprensa Nacional - Casa da Moeda.

Palma, A. (2020). Student participation in Higher Education Governance and Institutional Quality. *Revista TMQ – Techniques, Methodologies and Quality*, 2020, 11, 09-20

Projeto STUPS – Student Participation without Borders <http://stupsproject.eu/wp-content/uploads/2021/09/The-Student-ParticipationInnovative-Practice-Guide.pdf>

Sahlin-Andersson, K. (1996). Imitating by editing success: The construction of organizational fields. In B. Czarniawska & G. Sevón (eds), *Translating organizational change* (pp. 69-93). New York: Walter de Gruyter.

Waeraas, A. & Nielsen, J. A. (2015). *Translation Theory “Translated”: Three Perspectives on Translation in Organizational Research*. Norwegian University of Life Sciences, School of Economics and Business (Working Paper). Obtido em: <https://doi.org/10.1111/ijmr.12092>

Wedlin, L. & Sahlin, K. (2017). The imitation and translation of management ideas. In Greenwood, R., Oliver, C., Lawrence, T. B. & Meyer, R. E. (pp.102-127). *The Sage Handbook of Organizational Institutionalism*. London: Sage Publications.

Youth Participation Strategy, <https://www.salto-youth.net/rc/participation/ypstrategy/>

## **ANEXOS**

## Anexo S1 – Amostra (Inicial) e respostas

| Escola                                                                        | Escola Abrev | Tipo curso | Curso                                                                         | Amostra    | Respostas  | Taxa de resposta |
|-------------------------------------------------------------------------------|--------------|------------|-------------------------------------------------------------------------------|------------|------------|------------------|
| <b>Instituto Politécnico de Portalegre</b>                                    |              |            |                                                                               |            |            |                  |
| <b>Escola Superior Agrária de Elvas</b>                                       |              |            |                                                                               | <b>113</b> | <b>27</b>  | <b>23,9%</b>     |
| Curso Técnico Superior Profissional - Cuidados Veterinários                   | ESAE         | CTESP      | Curso Técnico Superior Profissional - Cuidados Veterinários                   | 23         |            | <b>0,0%</b>      |
| Lic. Agronomia                                                                | ESAE         | L          | Licenciatura em Agronomia                                                     | 15         | 9          | <b>60,0%</b>     |
| Lic. Enfermagem Veterinária                                                   | ESAE         | L          | Licenciatura em Enfermagem Veterinária                                        | 40         | 17         | <b>42,5%</b>     |
| Lic. Equinocultura                                                            | ESAE         | L          | Licenciatura em Equinocultura                                                 | 17         | 1          | <b>5,9%</b>      |
| Mestrado em Agricultura Sustentável                                           | ESAE         | M          | Mestrado em Agricultura Sustentável                                           | 18         |            | <b>0,0%</b>      |
| <b>Escola Superior de Educação e Ciências Sociais</b>                         |              |            |                                                                               | <b>78</b>  | <b>46</b>  | <b>59,0%</b>     |
| Curso Técnico Superior Profissional - Turismo e Informação Turística          | ESECS        | CTESP      | Curso Técnico Superior Profissional - Turismo e Informação Turística          | 11         |            | <b>0,0%</b>      |
| Lic. Educação Básica                                                          | ESECS        | L          | Licenciatura em Educação Básica                                               | 15         | 11         | <b>73,3%</b>     |
| Lic. Educação Social                                                          | ESECS        | L          | Licenciatura em Educação Social                                               | 19         | 21         | <b>110,5%</b>    |
| Licenciatura em Jornalismo e Comunicação                                      | ESECS        | L          | Licenciatura em Jornalismo e Comunicação                                      | 33         |            | <b>0,0%</b>      |
| Lic. Turismo                                                                  |              |            |                                                                               |            | 4          |                  |
| Lic. Serviço Social                                                           | ESECS        | L          | Licenciatura em Serviço Social                                                | 34         | 5          | <b>14,7%</b>     |
| Lic. Serviço Social (pós-laboral)                                             | ESECS        | LN         | Licenciatura em Serviço Social (pós-laboral)                                  | 14         | 1          | <b>7,1%</b>      |
| Mest. Educação e Proteção de Crianças e Jovens em Risco                       | ESECS        | M          | Mestrado em Educação e Proteção de Crianças e Jovens em Risco                 | 13         | 4          | <b>30,8%</b>     |
| <b>Escola Superior de Saúde (IPP)</b>                                         |              |            |                                                                               | <b>119</b> | <b>42</b>  | <b>35,3%</b>     |
| Curso Técnico Superior Profissional - Proteção Civil e Socorro                | ESS PTL      | CTESP      | Curso Técnico Superior Profissional - Proteção Civil e Socorro                | 7          | 0          | <b>0,0%</b>      |
| Lic. Enfermagem                                                               | ESS PTL      | L          | Licenciatura em Enfermagem                                                    | 93         | 42         | <b>45,2%</b>     |
| Licenciatura em Higiene Oral                                                  | ESS PTL      | L          | Licenciatura em Higiene Oral                                                  | 19         | 0          | <b>0,0%</b>      |
| <b>Escola Superior de Tecnologia e Gestão</b>                                 |              |            |                                                                               | <b>205</b> | <b>95</b>  | <b>46,3%</b>     |
| Curso Técnico Superior Profissional - Design de Som e Produção Musical        | ESTG         | CTESP      | Curso Técnico Superior Profissional - Design de Som e Produção Musical        | 19         |            | <b>0,0%</b>      |
| Administração de publicidade e marketing                                      |              |            |                                                                               |            | 6          |                  |
| Lic. Design de Animação e Multimédia                                          | ESTG         | L          | Licenciatura em Design de Animação e Multimédia                               | 39         | 7          | <b>17,9%</b>     |
| Licenciatura em Design de Comunicação                                         | ESTG         | L          | Licenciatura em Design de Comunicação                                         | 24         |            | <b>0,0%</b>      |
| Lic. Engenharia Informática                                                   | ESTG         | L          | Licenciatura em Engenharia Informática                                        | 19         | 32         | <b>168,4%</b>    |
| Lic. Gestão                                                                   | ESTG         | L          | Licenciatura em Gestão                                                        | 48         | 25         | <b>52,1%</b>     |
| Lic. Tecnologias de Produção de Biocombustíveis                               | ESTG         | L          | Licenciatura em Tecnologias de Produção de Biocombustíveis                    | 11         | 4          | <b>36,4%</b>     |
| Licenciatura em Gestão (pós-laboral)                                          | ESTG         | LN         | Licenciatura em Gestão (pós-laboral)                                          | 17         | 8          | <b>47,1%</b>     |
| Mestrado em Contabilidade e Finanças                                          | ESTG         | M          | Mestrado em Contabilidade e Finanças                                          | 11         |            | <b>0,0%</b>      |
| Mest. Gestão de PME                                                           | ESTG         | M          | Mestrado em Gestão de PME                                                     | 17         | 9          | <b>52,9%</b>     |
| Mest. Design de Identidade Digital                                            |              |            |                                                                               | 0          | 4          |                  |
| <b>Total Geral IPP</b>                                                        |              |            |                                                                               | <b>515</b> | <b>210</b> | <b>40,8%</b>     |
| <b>Instituto Politécnico de Setúbal</b>                                       |              |            |                                                                               |            |            |                  |
| <b>Escola Superior de Ciências Empresariais</b>                               |              |            |                                                                               | <b>669</b> | <b>103</b> | <b>15,4%</b>     |
| Curso Técnico Superior Profissional de Apoio à Gestão de Organizações Sociais | ESCE         | CTESP      | Curso Técnico Superior Profissional de Apoio à Gestão de Organizações Sociais | 24         | 0          | <b>0,0%</b>      |

| Escola                                                             | Escola Abrev | Tipo curso | Curso                                                                                    | Amostra    | Respostas  | Taxa de resposta |
|--------------------------------------------------------------------|--------------|------------|------------------------------------------------------------------------------------------|------------|------------|------------------|
| CTESP Assessoria de Gestão                                         | ESCE         | CTESP      | Curso Técnico Superior Profissional em Assessoria de Gestão                              | 23         | 8          | 34,8%            |
| CTESP Gestão de Turismo                                            | ESCE         | CTESP      | Curso Técnico Superior Profissional em Gestão de Turismo                                 | 28         | 17         | 60,7%            |
| GCE                                                                |              |            |                                                                                          |            | 1          | 0,0%             |
| Liç Contabilidade e Finanças                                       | ESCE         | L          | Liçençatura em Contabilidade e Finanças                                                  | 74         | 24         | 32,4%            |
| Liçençatura em Gestão da Distribuição e da Logística               | ESCE         | L          | Liçençatura em Gestão da Distribuição e da Logística                                     | 71         |            | 0,0%             |
| Liç Gestão de Recursos Humanos                                     | ESCE         | L          | Liçençatura em Gestão de Recursos Humanos                                                | 87         | 12         | 13,8%            |
| Liç Gestão de Sistemas de Informação                               | ESCE         | L          | Liçençatura em Gestão de Sistemas de Informação                                          | 48         | 2          | 4,2%             |
| Liçençatura em Marketing                                           | ESCE         | L          | Liçençatura em Marketing                                                                 | 53         |            | 0,0%             |
| Liçençatura em Contabilidade e Finanças (Regime Noturno)           | ESCE         | LN         | Liçençatura em Contabilidade e Finanças (Regime Noturno)                                 | 45         |            | 0,0%             |
| Liçençatura em Gestão da Distribuição e da Logística (Pós-Laboral) | ESCE         | LN         | Liçençatura em Gestão da Distribuição e da Logística (Pós-Laboral)                       | 51         |            | 0,0%             |
| Liçençatura em Gestão de Recursos Humanos (Pós-Laboral)            | ESCE         | LN         | Liçençatura em Gestão de Recursos Humanos (Pós-Laboral)                                  | 70         |            | 0,0%             |
| Mest Ciências Empresariais                                         | ESCE         | M          | Mestrado em Ciências Empresariais                                                        | 25         | 11         | 44,0%            |
| Mest Contabilidade e Finanças                                      | ESCE         | M          | Mestrado em Contabilidade e Finanças                                                     | 24         | 7          | 29,2%            |
| Mest Gestão e Administração de Escolas                             | ESCE         | M          | Mestrado em Gestão e Administração de Escolas                                            | 27         | 7          | 25,9%            |
| Mest em Segurança e Higiene no Trabalho                            | ESCE         | M          | Mestrado em Segurança e Higiene no Trabalho                                              | 19         | 11         | 57,9%            |
| Mestrado                                                           |              |            |                                                                                          |            | 6          |                  |
| <b>Escola Superior de Educação</b>                                 |              |            |                                                                                          | <b>253</b> | <b>145</b> | <b>57,3%</b>     |
| CTESP Desportos de Natureza                                        | ESE          | CTESP      | Curso Técnico Superior Profissional em Desportos de Natureza                             | 40         | 20         | 50,0%            |
| Liç Animação SocioCultural                                         | ESE          | L          | Liçençatura em Animação SocioCultural                                                    | 32         | 19         | 59,4%            |
| Liç Comunicação Social                                             | ESE          | L          | Liçençatura em Comunicação Social                                                        | 38         | 21         | 55,3%            |
| Liç Desporto                                                       | ESE          | L          | Liçençatura em Desporto                                                                  | 43         | 17         | 39,5%            |
| Liç Educação Básica                                                | ESE          | L          | Liçençatura em Educação Básica                                                           | 52         | 35         | 67,3%            |
| Liç Tradução e Interpretação de Língua Gestual Portuguesa          | ESE          | L          | Liçençatura em Tradução e Interpretação de Língua Gestual Portuguesa                     | 19         | 13         | 68,4%            |
| Mest Educação Pré-Escolar e Ensino do 1º Ciclo do Ensino Básico    | ESE          | M          | Mestrado em Educação Pré-Escolar e Ensino do 1º Ciclo do Ensino Básico                   | 29         | 20         | 69,0%            |
| <b>Escola Superior de Saúde - IPS</b>                              |              |            |                                                                                          | <b>188</b> | <b>61</b>  | <b>32,4%</b>     |
| Liç Acupuntura                                                     | ESS          | L          | Liçençatura em Acupuntura                                                                | 14         | 3          | 21,4%            |
| Liç Enfermagem                                                     | ESS          | L          | Liçençatura em Enfermagem                                                                | 57         | 1          | 1,8%             |
| Liç Fisioterapia                                                   | ESS          | L          | Liçençatura em Fisioterapia                                                              | 42         | 34         | 81,0%            |
| Liç Terapia da Fala                                                | ESS          | L          | Liçençatura em Terapia da Fala                                                           | 28         | 21         | 75,0%            |
| Mestrado em Enfermagem                                             | ESS          | M          | Mestrado em Enfermagem                                                                   | 25         |            | 0,0%             |
| Mest Fisioterapia em Condições Músculo-Esqueléticas                | ESS          | M          | Mestrado em Fisioterapia em Condições Músculo-Esqueléticas                               | 22         | 2          | 9,1%             |
| <b>Escola Superior de Tecnologia de Setúbal</b>                    |              |            |                                                                                          | <b>692</b> | <b>310</b> | <b>44,8%</b>     |
| CTeSP                                                              |              |            |                                                                                          |            | 1          |                  |
| CTESP Automação, Robótica e Controlo Industrial                    | ESTS         | CTESP      | Curso Técnico Superior Profissional em Automação, Robótica e Controlo Industrial         | 30         | 15         | 50,0%            |
| CTESP Manutenção Industrial                                        | ESTS         | CTESP      | Curso Técnico Superior Profissional em Manutenção Industrial                             | 31         | 12         | 38,7%            |
| CTESP Produção Aeronáutica                                         | ESTS         | CTESP      | Curso Técnico Superior Profissional em Produção Aeronáutica                              | 28         | 11         | 39,3%            |
| CTESP Programação Web, Dispositivos e Aplicações Móveis            | ESTS         | CTESP      | Curso Técnico Superior Profissional em Programação Web, Dispositivos e Aplicações Móveis | 23         | 17         | 73,9%            |
| CTESP Qualidade Ambiental e Alimentar                              | ESTS         | CTESP      | Curso Técnico Superior Profissional em Qualidade Ambiental e Alimentar                   | 21         | 10         | 47,6%            |

| Escola                                                    | Escola Abrev | Tipo curso | Curso                                                                                                | Amostra    | Respostas | Taxa de resposta |
|-----------------------------------------------------------|--------------|------------|------------------------------------------------------------------------------------------------------|------------|-----------|------------------|
| CTESP Sistemas Eletrônicos e Computadores                 | ESTS         | CTESP      | Curso Técnico Superior Profissional em Sistemas Eletrônicos e Computadores                           | 21         | 12        | 57,1%            |
| CTESP Tecnologias e Programação de Sistemas de Informação | ESTS         | CTESP      | Curso Técnico Superior Profissional em Tecnologias e Programação de Sistemas de Informação - Amadora | 21         | 5         | 23,8%            |
| CTESP Informática                                         |              |            |                                                                                                      |            | 1         |                  |
| Liç Engenharia de Automação, Controlo e Instrumentação    | ESTS         | Liçent     | Liçençatura em Engenharia de Automação, Controlo e Instrumentação                                    | 43         | 4         | 9,3%             |
| Liç Engenharia Eletrotécnica e de Computadores            | ESTS         | Liçent     | Liçençatura em Engenharia Eletrotécnica e de Computadores                                            | 27         | 24        | 88,9%            |
| Liç Engenharia Informática                                | ESTS         | Liçent     | Liçençatura em Engenharia Informática                                                                | 98         | 49        | 50,0%            |
| Liç Engenharia Mecânica                                   | ESTS         | Liçent     | Liçençatura em Engenharia Mecânica                                                                   | 90         | 22        | 24,4%            |
| Liç Tecnologia Biomédica                                  | ESTS         | Liçent     | Liçençatura em Tecnologia Biomédica                                                                  | 42         | 36        | 85,7%            |
| Liç Tecnologia e Gestão Industrial                        | ESTS         | Liç Notur  | Liçençatura em Tecnologia e Gestão Industrial                                                        | 58         | 3         | 5,2%             |
| Liç Tecnologias de Energia                                | ESTS         | Liçent     | Liçençatura em Tecnologias de Energia                                                                | 54         | 27        | 50,0%            |
| Liç Tecnologias do Ambiente e do Mar                      | ESTS         | Liçent     | Liçençatura em Tecnologias do Ambiente e do Mar                                                      | 52         | 26        | 50,0%            |
| MEI                                                       |              |            |                                                                                                      |            | 1         |                  |
| Mest Engenharia Biomédica                                 | ESTS         | Mest       | Mestrado em Engenharia Biomédica                                                                     | 14         | 12        | 85,7%            |
| Mest Engenharia de Produção                               | ESTS         | Mest       | Mestrado em Engenharia de Produção                                                                   | 19         | 7         | 36,8%            |
| Mest Engenharia de Software                               | ESTS         | Mest       | Mestrado em Engenharia de Software                                                                   | 20         | 14        | 70,0%            |
| Mestrado                                                  |              |            |                                                                                                      |            | 1         |                  |
| <b>Escola Superior de Tecnologia do Barreiro</b>          |              |            |                                                                                                      | <b>247</b> | <b>82</b> | <b>33,2%</b>     |
| Curso Técnico Superior Profissional em Construção Civil   | ESTB         | CTESP      | Curso Técnico Superior Profissional em Construção Civil                                              | 26         | 0         | 0,0%             |
| CTESP Tecnologias de Laboratório Químico e Biológico      | ESTB         | CTESP      | Curso Técnico Superior Profissional em Tecnologias de Laboratório Químico e Biológico                | 33         | 3         | 9,1%             |
| Liç Engenharia Civil (regime noturno)                     | ESTB         | Liç Notur  | Liçençatura em Engenharia Civil (regime noturno)                                                     | 34         | 4         | 11,8%            |
| Liç Bioinformática                                        | ESTB         | Liçent     | Liçençatura em Bioinformática                                                                        | 32         | 16        | 50,0%            |
| Liçençatura em Biotecnologia                              | ESTB         | Liçent     | Liçençatura em Biotecnologia                                                                         | 32         | 0         | 0,0%             |
| Liç Engenharia Civil                                      | ESTB         | Liçent     | Liçençatura em Engenharia Civil (regime diurno)                                                      | 21         | 17        | 81,0%            |
| Liç Tecnologias do Petróleo                               | ESTB         | Liçent     | Liçençatura em Tecnologias do Petróleo                                                               | 29         | 14        | 48,3%            |
| Mest Conservação e Reabilitação do Edifício               | ESTB         | Mest       | Mestrado em Conservação e Reabilitação do Edifício                                                   | 13         | 8         | 61,5%            |
| Mest Engenharia Biológica e Química                       | ESTB         | Mest       | Mestrado em Engenharia Biológica e Química                                                           | 16         | 12        | 75,0%            |
| Mest Engenharia Civil                                     | ESTB         | Mest       | Mestrado em Engenharia Civil                                                                         | 11         | 8         | 72,7%            |
| Total Geral ips                                           |              |            |                                                                                                      | 2049       | 701       | 34,2%            |

## Anexo S2 – O questionário

# PARTICIPAÇÃO DOS ESTUDANTES E QUALIDADE DAS INSTITUIÇÕES DE ENSINO SUPERIOR (PEQUES)

Caro(a) estudante

Com este questionário pretendemos conhecer as perspetivas dos estudantes sobre a sua participação nas Instituições do Ensino Superior (IES), mais concretamente, nos Institutos Politécnicos de Portalegre e de Setúbal.

Consideramos que só com esse conhecimento poderemos identificar os limites e as possibilidades dessa participação, contribuindo para políticas institucionais que se traduzam no desenvolvimento das IES.

Mas esse conhecimento só se pode construir com a recolha das opiniões dos estudantes. Por isso é que lhe apresentamos o pedido para responder a este questionário.

A equipa responsável pelo estudo:

Albertina Palma (IP Setúbal)

Ana Maria Pessoa (IP Setúbal)

Bruno Fragueiro (Associação Académica IPSetúbal)

Carla Cibebe Figueiredo (IP Setúbal)

Fernando Almeida (IP Setúbal)

Filipe Fialho (IP Setúbal)

Inês Silva (Associação Académica IPSetúbal)

João Pedro Pereira (Federação Nacional de Associações de Estudantes do Ensino Superior Politécnico - FNAEESP) -

João Vinagre (IP Setúbal)

Joaquim Mourato (IP Portalegre)

Rodrigo Lourenço (IP Setúbal)

Rosário Rodrigues (IP Setúbal)



There are 24 questions in this survey.

As suas respostas a este questionário serão tratadas estatisticamente para os efeitos descritos na página inicial deste questionário e será rigorosamente assegurado o seu anonimato.

A sua colaboração neste estudo através do preenchimento deste questionário é voluntária e poderá interrompê-la em qualquer momento.

Tendo conhecimento destas condições, aceita responder a este questionário?

\*

❗ Escolha uma das seguintes respostas

Por favor, selecione **apenas uma** das seguintes opções:

☐ Sim

☐ Não

Se responder "Não" termine o preenchimento do questionário e feche a aplicação.

Que importância atribui à participação dos estudantes relativamente a:

\*

Por favor, selecione a posição apropriada para cada elemento:

|                                                                                                                                                                 | Muito importante      | Importante            | Pouco importante      | Nada importante       | Não sei / Não respondo |
|-----------------------------------------------------------------------------------------------------------------------------------------------------------------|-----------------------|-----------------------|-----------------------|-----------------------|------------------------|
| Funcionamento pedagógico (regimes de frequência e de avaliação das unidades curriculares (UC), horários, calendarização das atividades escolares, etc.)         | <input type="radio"/>  |
| Estruturação curricular dos cursos (adequação das UC às competências a desenvolver, número de créditos das UC, localização das UC em cada ano curricular, etc.) | <input type="radio"/>  |
| Oferta de novos cursos                                                                                                                                          | <input type="radio"/>  |
| Organização e o funcionamento dos serviços (biblioteca, bares e refeitórios, papelaria, serviços académicos, mobilidade, etc.)                                  | <input type="radio"/>  |
| Disponibilização de apoios sociais aos estudantes (bolsas, serviços médicos, alojamento, etc.)                                                                  | <input type="radio"/>  |

|                                                                                                            | Muito importante      | Importante            | Pouco importante      | Nada importante       | Não sei / Não respondo |
|------------------------------------------------------------------------------------------------------------|-----------------------|-----------------------|-----------------------|-----------------------|------------------------|
| Interação com a comunidade envolvente (projetos, eventos, divulgação da instituição e das formações, etc.) | <input type="radio"/>  |

Em que medida considera que são tidos em conta os contributos dos estudantes para:

\*

Por favor, selecione a posição apropriada para cada elemento:

|                                                                                                                                                                          | <b>Sempre</b>         | <b>Muitas vezes</b>   | <b>Poucas vezes</b>   | <b>Nunca</b>          | <b>Não sei / Não respondo</b> |
|--------------------------------------------------------------------------------------------------------------------------------------------------------------------------|-----------------------|-----------------------|-----------------------|-----------------------|-------------------------------|
| <b>O funcionamento pedagógico (regimes de frequência e de avaliação das unidades curriculares (UC), horários, calendarização das atividades escolares, etc.)</b>         | <input type="radio"/>         |
| <b>A estruturação curricular dos cursos (adequação das UC às competências a desenvolver, número de créditos das UC, localização das UC em cada ano curricular, etc.)</b> | <input type="radio"/>         |
| <b>A oferta de novos cursos</b>                                                                                                                                          | <input type="radio"/>         |
| <b>A organização e o funcionamento dos serviços (biblioteca, bares e refeitórios, papelaria, serviços académicos, mobilidade, etc.)</b>                                  | <input type="radio"/>         |
| <b>A disponibilização de apoios sociais aos estudantes (bolsas, serviços médicos, alojamento, etc.)</b>                                                                  | <input type="radio"/>         |

|                                                                                                              |                       | Muitas<br>vezes       | Poucas<br>vezes       |                       | Não sei /<br>Não<br>respondo |
|--------------------------------------------------------------------------------------------------------------|-----------------------|-----------------------|-----------------------|-----------------------|------------------------------|
|                                                                                                              | Sempre                |                       |                       | Nunca                 |                              |
| A interação com a comunidade envolvente (projetos, eventos, divulgação da instituição e das formações, etc.) | <input type="radio"/>        |

Assinale agora a importância que atribui às seguintes situações, enquanto fatores que **facilitam** ou **promovem** a sua participação na instituição. \*

Por favor, selecione a posição apropriada para cada elemento:

|                                                                                             | Muito importante      | Importante            | Pouco importante      | Nada importante       | Não sei / Não respondo |
|---------------------------------------------------------------------------------------------|-----------------------|-----------------------|-----------------------|-----------------------|------------------------|
| O meu interesse pela discussão e tomada de decisão sobre o funcionamento da instituição.    | <input type="radio"/>  |
| O interesse que a instituição demonstra em conhecer a minha opinião sobre as suas decisões. | <input type="radio"/>  |
| O convite a participar por parte de colegas ou de professores.                              | <input type="radio"/>  |
| Considerar que a minha participação é um dever pessoal.                                     | <input type="radio"/>  |
| Ter os conhecimentos necessários para participar.                                           | <input type="radio"/>  |
| O incentivo da Associação Académica para a participação na instituição.                     | <input type="radio"/>  |
| A necessidade de afirmar e valorizar a intervenção dos estudantes na instituição.           | <input type="radio"/>  |

|                                                                                                                                   | Muito importante      | Importante            | Pouco importante      | Nada importante       | Não sei / Não respondo |
|-----------------------------------------------------------------------------------------------------------------------------------|-----------------------|-----------------------|-----------------------|-----------------------|------------------------|
| Considerar que o contacto direto e individual com os professores e/ou com os serviços não é eficaz para a resolução de problemas. | <input type="radio"/>  |
| A disponibilização pela instituição de informação sobre o seu funcionamento e a sua atividade.                                    | <input type="radio"/>  |
| Perceber que a instituição valoriza a perspetiva dos estudantes.                                                                  | <input type="radio"/>  |
| A divulgação pela instituição de uma informação completa e atualizada sobre o seu funcionamento e a sua atividade.                | <input type="radio"/>  |
| Outro(s) fator(es). (se não pretende acrescentar outro(s) fator(es) assinale a opção de resposta "Não sei / Não respondo")        | <input type="radio"/>  |

Se na questão anterior respondeu em "outro(s) fator(es)",  
indique aqui esse(s) fator(es).

Por favor, escreva aqui a sua resposta:



Assinale a importância que atribui às situações apresentadas a seguir, enquanto fatores de **limitação** ou **impedimento** da sua participação na instituição.

\*

Por favor, selecione a posição apropriada para cada elemento:

|                                                                                                      | Muito importante      | Importante            | Pouco importante      | Nada importante       | Não sei / Não respondo |
|------------------------------------------------------------------------------------------------------|-----------------------|-----------------------|-----------------------|-----------------------|------------------------|
| A falta de disponibilidade devido ao cumprimento das tarefas escolares.                              | <input type="radio"/>  |
| Não tenho os conhecimentos necessários para participar.                                              | <input type="radio"/>  |
| O meu desinteresse pela discussão e tomada de decisão sobre o funcionamento da instituição.          | <input type="radio"/>  |
| Considero que a instituição não tem interesse em conhecer a minha opinião sobre o seu funcionamento. | <input type="radio"/>  |
| Nunca recebi um pedido ou convite a participar por parte de colegas ou de professores.               | <input type="radio"/>  |

|                                                                                                              |                       |                       |                       |                       |                       |
|--------------------------------------------------------------------------------------------------------------|-----------------------|-----------------------|-----------------------|-----------------------|-----------------------|
| <b>Tenho receio de represálias quando enuncio críticas e faço sugestões sobre a instituição.</b>             | <input type="radio"/> |
| <b>Resolvo os problemas através do contacto direto e individual com os professores e/ou com os serviços.</b> | <input type="radio"/> |

|                                                                                                              | Muito importante      | Importante            | Pouco importante      | Nada importante       | Não sei / Não respondo |
|--------------------------------------------------------------------------------------------------------------|-----------------------|-----------------------|-----------------------|-----------------------|------------------------|
| Sou de opinião que a instituição considera que não tenho os conhecimentos necessários para ser ouvido/a.     | <input type="radio"/>  |
| A instituição não me dá informação sobre o seu funcionamento e a sua atividade.                              | <input type="radio"/>  |
| Não tenho disponibilidade para participar por fatores pessoais / familiares.                                 | <input type="radio"/>  |
| A informação a que tenho acesso sobre o funcionamento e atividade da instituição é superficial e incompleta. | <input type="radio"/>  |
| A falta de incentivo da Associação Académica para os estudantes participarem na instituição.                 | <input type="radio"/>  |
| A minha participação é dificultada por fatores profissionais.                                                | <input type="radio"/>  |

|                                                                                                                                   |                       |                       |                       |                       |                       |
|-----------------------------------------------------------------------------------------------------------------------------------|-----------------------|-----------------------|-----------------------|-----------------------|-----------------------|
| <b>Outro(s) fator(es). (Se não pretende indicar outro(s) fator(es), assinale a opção de de resposta "Não sei / Não respondo")</b> | <input type="radio"/> |
|                                                                                                                                   |                       |                       |                       |                       |                       |

Se na questão anterior assinalou "outro(s) fator(es)", indique aqui esse(s) fator(es):

Por favor, escreva aqui a sua resposta:

Integra ou já integrou algum ou alguns dos órgãos de gestão da sua escola / Instituto Politécnico?

\*

Por favor, selecione **apenas uma** das seguintes opções:

☐ Sim

☐ Não

Qual ou quais os órgãos de gestão que integra ou já integrou?

\*

Responda a esta pergunta apenas se as seguintes condições são verdadeiras:

A resposta for 'Sim' na pergunta '8 [Porgaos]' (Integra ou já integrou algum ou alguns dos órgãos de gestão da sua escola / Instituto Politécnico? )

❗ Seleccione todas as que se apliquem

Por favor, seleccione **todas** as que se aplicam:

- ☐ Conselho Pedagógico
- ☐ Conselho de Representantes
- ☐ Comissão de Acompanhamento e Avaliação de curso
- ☐ Conselho Geral do Instituto Politécnico
- ☐ Conselho Académico do Instituto Politécnico
- ☐ Estruturas para a avaliação e qualidade

☐ Outro:

De que forma(s) participa no(s) órgão(s) de gestão referidos na questão anterior? \*

Responda a esta pergunta apenas se as seguintes condições são verdadeiras:

A resposta for 'Sim' na pergunta '8 [Porgaos]' (Integra ou já integrou algum ou alguns dos órgãos de gestão da sua escola / Instituto Politécnico? )

❗ Seleccione todas as que se apliquem

Por favor, seleccione **todas** as que se aplicam:

- ☐ Estou presente nas reuniões do(s) órgão(s) a que pertenço.
- ☐ Leio os documentos discutidos nas reuniões.
- ☐ Apresento propostas de alteração aos documentos discutidos nas reuniões.
- ☐ Intervenho nos debates que ocorrem nas reuniões.
- ☐ Elaboro documentos para serem discutidos nas reuniões.
- ☐ Participo em grupos de trabalho constituídos no âmbito dos órgãos de gestão a que pertenço.

☐ Outro:

Independentemente dos órgãos de gestão da escola / Instituto, participou com os seus colegas em debates sobre o funcionamento do seu curso ou da sua escola?

\*

Por favor, selecione **apenas uma** das seguintes opções:

☐ Sim

☐ Não

De que forma(s) participa nos debates referidos na questão anterior?

\*

Responda a esta pergunta apenas se as seguintes condições são verdadeiras:

A resposta for 'Sim' na pergunta '11 [reunioes]' (Independentemente dos órgãos de gestão da escola / Instituto, participou com os seus colegas em debates sobre o funcionamento do seu curso ou da sua escola? )

❗ Selecione todas as que se apliquem

Por favor, selecione **todas** as que se aplicam:

☐ Leio os documentos discutidos.

☐ Apresento propostas de alteração aos documentos discutidos.

☐ Intervenho nos debates.

☐ Elaboro documentos para serem discutidos.

☐ Participo em grupos de trabalho.

☐ Outro:

Integra ou já integrou algum ou alguns dos órgãos/estruturas da Associação Académica do seu Instituto Politécnico?

\*

Por favor, selecione **apenas uma** das seguintes opções:

☐ Sim

☐ Não

Em que órgão(s) / estrutura(s) da Associação Académica do seu Instituto Politécnico tem participado?

\*

Responda a esta pergunta apenas se as seguintes condições são verdadeiras:

A resposta for 'Sim' na pergunta '13 [assoc]' (Integra ou já integrou algum ou alguns dos órgãos/estruturas da Associação Académica do seu Instituto Politécnico? )

❗ Seleccione todas as que se apliquem

Por favor, selecione **todas** as que se aplicam:

☐ Órgãos diretivos (Direção, mesa da Assembleia ou Conselho Fiscal)

☐ Conselho de estudantes

☐ Núcleos de curso

☐ Comissão de praxe

☐ Outro:



Fora do âmbito académico tem ou teve alguma participação em grupos ou associações de carácter político, social, cultural, desportivo, etc?

\*

Por favor, selecione **apenas uma** das seguintes opções:

☐ Sim

☐ Não

Qual a natureza do(s) grupo(s) ou associação(ões) em que tem participado e a que se referiu na questão anterior? \*

Responda a esta pergunta apenas se as seguintes condições são verdadeiras:

A resposta for 'Sim' na pergunta '15 [fora]' (Fora do âmbito académico tem ou teve alguma participação em grupos ou associações de carácter político, social, cultural, desportivo, etc? )

❗ Selecione todas as que se apliquem

Por favor, selecione **todas** as que se aplicam:

- ☐ Político-partidária
- ☐ Social / Cultural / Recreativa
- ☐ Desportiva
- ☐ Religiosa
- ☐ Sindical
- ☐ Profissional
- ☐ Não respondo

☐ Outro:

Em que Instituição de Ensino Superior está a estudar?

\*

❗ Escolha uma das seguintes respostas

Por favor, seleccione **apenas uma** das seguintes opções:

☐ Instituto Politécnico de Portalegre

☐ Instituto Politécnico de Setúbal

E em que escola?

\*

Responda a esta pergunta apenas se as seguintes condições são verdadeiras:

A resposta for 'Instituto Politécnico de Portalegre' na pergunta '17 [Insti]' (Em que Instituição de Ensino Superior está a estudar? )

❗ Escolha uma das seguintes respostas

Por favor, seleccione **apenas uma** das seguintes opções:

☐ ESAE - Escola Superior Agrária de Elvas

☐ ESECS - Escola Superior de Educação e Ciências Sociais

☐ ESS - Escola Superior de Saúde

☐ ESTG - Escola Superior de Tecnologia e Gestão

## E em que escola? \*

Responda a esta pergunta apenas se as seguintes condições são verdadeiras:

A resposta for 'Instituto Politécnico de Setúbal' na pergunta '17 [Insti]' (Em que Instituição de Ensino Superior está a estudar? )

❗ Escolha uma das seguintes respostas

Por favor, selecione **apenas uma** das seguintes opções:

- ☐ Escola Superior de Ciências Empresariais
- ☐ Escola Superior de Educação
- ☐ Escola Superior de Saúde
- ☐ Escola Superior de Tecnologia do Barreiro
- ☐ Escola Superior de Tecnologia de Setúbal

Qual é o curso que está a frequentar?

\*

Por favor, escreva aqui a sua resposta:

**Se é um/a estudante inscrito/a em UC isoladas, responda "UC isoladas".**

**Se é um/a estudante em mobilidade, responda "Em mobilidade".**

E qual é o ano curricular que está a frequentar?

\*

❗ Escolha uma das seguintes respostas

Por favor, seleccione **apenas uma** das seguintes opções:

- ☐ 1º ano
- ☐ 2º ano
- ☐ 3º ano
- ☐ 4º ano
- ☐ Outra situação

**Se for estudante em mobilidade ou se está inscrito/a em UC isoladas responda na opção - "Outra situação".**

Indique em que escalão etário se situa a sua idade:

\*

❗ Escolha uma das seguintes respostas

Por favor, seleccione **apenas uma** das seguintes opções:

- ☐ Até 23 anos
- ☐ De 24 a 30 anos
- ☐ De 31 a 45 anos
- ☐ Mais de 45 anos

Qual é o seu género?

\*

❗ Escolha uma das seguintes respostas

Por favor, seleccione **apenas uma** das seguintes opções:

- ☐ Masculino
- ☐ Feminino
- ☐ Outro

Se pretender pode aqui deixar um comentário, crítica ou sugestão...

Por favor, escreva aqui a sua resposta:

Obrigado por ter concluído a resposta a este inquérito.

30.03.2022 – 01:00

Submeter o seu inquérito

Obrigado por ter concluído este inquérito.

### Anexo S3 – Listagem das ordens de trabalho das reuniões dos órgãos do IPSetúbal, realizadas em 2019

| N  | ÓRGÃO        | Data   | Est. | Ordem de trabalhos                                                                                                                                                                                                                                                                                                                                                                                                                                                                                               | Tópicos NG | Foro Pedag. | Estudantes | IPSetúbal Geral |
|----|--------------|--------|------|------------------------------------------------------------------------------------------------------------------------------------------------------------------------------------------------------------------------------------------------------------------------------------------------------------------------------------------------------------------------------------------------------------------------------------------------------------------------------------------------------------------|------------|-------------|------------|-----------------|
| 1  | CG_IPSetúbal | 03/jan | 2    | 1. Tomada de posse;<br>2. Aprovação do Orçamento e mapa de pessoal para 2019;<br>3. Aprovação do Plano de Atividades para 2018;<br>4. Balanço da auditoria A3ES;<br>5. Outros assuntos                                                                                                                                                                                                                                                                                                                           | 3          |             |            | 3               |
| 2  | CG_IPSetúbal | 04/fev | 2    | 1. Preparação do documento de análise para CNE sobre os temas RJIES e acesso ao ensino superior;<br>2. Parecer do MCTES sobre os Estatutos;<br>3. Outros assuntos                                                                                                                                                                                                                                                                                                                                                | 2          |             |            | 2               |
| 3  | CG_IPSetúbal | 14/mar | 1    | 1. Visita Feira de Emprego IPSetúbal (16h30 17h00);<br>2. Tomada de posse de Conselheiros (17h00 17h15);<br>3. Aprovação das atas das reuniões anteriores (17h15 17h30);<br>4. Análise e aprovação da proposta de alteração aos estatutos de a bordo com parecer do MCTES (17h30 18h00);<br>5. Aprovação do plano de atividades (18h00 18h45);<br>6. Aprovação das propinas para o ano letivo 2019/2020 (18h45 19h00);<br>7. Nota a enviar ao CNE sobre alterações ao RJIES (19h00 19h30);<br>8. Outros assuntos | 5          |             | 1          | 4               |
| 4  | CG_IPSetúbal | 29/abr | 2    | 1. Tomada de posse de Conselheiros;<br>2. Apresentação do relatório de atividades e contas de 2018;<br>3. Proposta de alteração dos valores das propinas;<br>4. Apresentação de estudo sobre abandono escolar nas licenciaturas do IPSetúbal;<br>5. Outros assuntos                                                                                                                                                                                                                                              | 3          |             | 2          | 1               |
| 5  | CG_IPSetúbal | 30/out | 2    | 1. Tomada de posse de Conselheiros;<br>2. Nomeação e eleição de Conselheiros externos;<br>3. Prorrogação do prazo de adaptação dos Estatutos das Unidades Orgânicas aos Estatutos do IPSetúbal<br>4. Outros assuntos                                                                                                                                                                                                                                                                                             | 2          |             |            | 2               |
| 6  | CR_ESTS      | 16/abr | 2    | Aprovação do Relatório de Atividades da ESTSetúbal 2018                                                                                                                                                                                                                                                                                                                                                                                                                                                          | 1          |             |            | 1               |
| 7  | CR_ESTS      | 03/jun | 2    | Revisão dos Estatutos da ESTSetúbal                                                                                                                                                                                                                                                                                                                                                                                                                                                                              | 1          |             |            | 1               |
| 8  | CR_ESTS      | 24/jul | 2    | Revisão dos Estatutos da ESTSetúbal                                                                                                                                                                                                                                                                                                                                                                                                                                                                              | 1          |             |            | 1               |
| 9  | CR_ESTS      | 20/set | 0    | Revisão dos Estatutos da ESTSetúbal                                                                                                                                                                                                                                                                                                                                                                                                                                                                              | 1          |             |            | 1               |
| 10 | CR_ESTS      | 16/out | 2    | Revisão dos Estatutos da ESTSetúbal                                                                                                                                                                                                                                                                                                                                                                                                                                                                              | 1          |             |            | 1               |
| 11 | CR_ESTS      | 20/nov | 2    | Votação da Proposta de Revisão dos Estatutos da ESTSetúbal                                                                                                                                                                                                                                                                                                                                                                                                                                                       | 1          |             |            | 1               |
| 12 | CP_ESTS      | 16/jan | 0    | 1. Informações;<br>2. Parecer sobre as propostas de mapa de exames do Mestrado em Engenharia de Software (MES);<br>3. Parecer sobre a proposta de nomeação dos elementos da Comissão Eventual de Divulgação do Conselho Pedagógico;<br>4. Aprovação da folha modelo do mapa de registo das atividades de avaliação e de trabalhos a desenvolver pelos alunos.                                                                                                                                                    | 3          | 2           | 1          |                 |

| N  | ÓRGÃO   | Data   | Est. | Ordem de trabalhos                                                                                                                                                                                                                                                                                                                                                                                                                                                                                                                                                                                              | Tópicos NG | Foro Pedag. | Estudantes | IPSetúbal Geral |
|----|---------|--------|------|-----------------------------------------------------------------------------------------------------------------------------------------------------------------------------------------------------------------------------------------------------------------------------------------------------------------------------------------------------------------------------------------------------------------------------------------------------------------------------------------------------------------------------------------------------------------------------------------------------------------|------------|-------------|------------|-----------------|
|    |         |        |      | 5. Aprovação da ata.                                                                                                                                                                                                                                                                                                                                                                                                                                                                                                                                                                                            |            |             |            |                 |
| 13 | CP_ESTS | 07/fev | 4    | 1. Informações;<br>2. Ratificação da votação sobre a proposta de mapa de exames do Mestrado em Engenharia de Software (MES);<br>3. Parecer sobre a proposta de mapa de testes da LTGI, 2º trimestre.<br>4. Parecer sobre proposta de criação de duas turmas para a unidade Curricular Matemática I a funcionar em semestre desencontrado.<br>5. Parecer sobre a proposta de nomeação dos elementos da Comissão Eventual de Divulgação do Conselho Pedagógico;<br>6. Aprovação da folha modelo do mapa de registo das atividades de avaliação e de trabalhos a desenvolver pelos alunos.<br>7. Aprovação da ata. | 5          | 4           | 1          |                 |
| 14 | CP_ESTS | 19/fev | 2    | 1. Informações;<br>2. Parecer sobre a proposta dos horários do 2º semestre das licenciaturas diurnas.<br>3. Parecer sobre a proposta dos horários do 2º semestre dos CTeSP.<br>4. Aprovação da ata.                                                                                                                                                                                                                                                                                                                                                                                                             | 2          | 2           |            |                 |
| 15 | CP_ESTS | 20/fev | 2    | 1. Informações;<br>2. Parecer sobre a proposta dos horários do 2º semestre das licenciaturas diurnas.<br>3. Parecer sobre a proposta dos horários do 2º semestre dos CTeSP.<br>4. Aprovação da ata.                                                                                                                                                                                                                                                                                                                                                                                                             | 2          | 2           |            |                 |
| 16 | CP_ESTS | 06/mar | 6    | 1. Informações;<br>2. Parecer sobre a proposta de mapa de testes das UC transversais das Licenciaturas.<br>3. Parecer sobre o mapa de testes de CTeSP<br>4. Parecer sobre a proposta de mudança de datas dos exames de EDO da LTGI.<br>5. Parecer sobre o Calendário Escolar 2019 – 2020 da ESTSetúbal/IPSetúbal.<br>6. Aprovação da ata.                                                                                                                                                                                                                                                                       | 4          | 4           |            |                 |
| 17 | CP_ESTS | 20/mar | 6    | 1. Informações;<br>2. Parecer sobre a nomeação dos Coordenadores do CTeSP em RSI e do CTeSP em PWDAM<br>3. Parecer sobre a proposta de mapa de testes das UC das Licenciaturas.<br>4. Parecer sobre o mapa de testes de CTeSP<br>5. Apresentação do relatório de avaliação do PAEF 2018.<br>6. Aprovação da ata.                                                                                                                                                                                                                                                                                                | 4          | 4           |            |                 |
| 18 | CP_ESTS | 03/abr | 6    | 1. Informações;<br>2. Parecer sobre a proposta de mapa de testes de Licenciaturas.<br>3. Parecer sobre o mapa de testes de CTeSP<br>4. Parecer sobre a proposta de Summer School – “IPSetúbal Design Innovation to Develop Week 2019”.<br>5. Aprovação da ata.                                                                                                                                                                                                                                                                                                                                                  | 3          | 2           | 1          |                 |
| 19 | CP_ESTS | 17/abr | 1    | 1. Informações;                                                                                                                                                                                                                                                                                                                                                                                                                                                                                                                                                                                                 | 3          | 3           | 0          |                 |



| N  | ÓRGÃO   | Data   | Est. | Ordem de trabalhos                                                                                                                                                                                                                                                                                                                                                                                                                                                                                                                                                                                                                                                                                                                                                                                                                                                                                                             | Tópicos NG | Foro Pedag. | Estudantes | IPSetúbal Geral |
|----|---------|--------|------|--------------------------------------------------------------------------------------------------------------------------------------------------------------------------------------------------------------------------------------------------------------------------------------------------------------------------------------------------------------------------------------------------------------------------------------------------------------------------------------------------------------------------------------------------------------------------------------------------------------------------------------------------------------------------------------------------------------------------------------------------------------------------------------------------------------------------------------------------------------------------------------------------------------------------------|------------|-------------|------------|-----------------|
|    |         |        |      | 2. Apreciação da proposta de Jornadas Pedagógicas 2019 da ESTSetúbal/IPSetúbal.<br>3. Parecer sobre o Mapa de Exames de Época Especial dos CTeSP<br>4. Parecer sobre a regras de marcação de testes e exames.<br>5. Aprovação da ata.                                                                                                                                                                                                                                                                                                                                                                                                                                                                                                                                                                                                                                                                                          |            |             |            |                 |
| 20 | CP_ESTS | 08/mai | 2    | 1. Informações;<br>2. Ratificação da votação por email sobre as Jornadas Pedagógicas da ESTSetúbal/IPSetúbal.<br>3. Parecer sobre a proposta de nomeação para Coordenador de Curso de LEACI.<br>4. Parecer sobre a proposta de Mapas de Exames de Época Especial dos CTeSP.<br>5. Parecer sobre a proposta de Mapas de Exames de Época Especial das Licenciaturas.<br>6. Parecer sobre a proposta de mapa de testes de LTGI.<br>7. Parecer sobre a regras de marcação de testes e exames.<br>8. Aprovação da ata.                                                                                                                                                                                                                                                                                                                                                                                                              | 6          | 6           | 0          |                 |
| 21 | CP_ESTS | 19/jun | 2    | 1. Informações;<br>2. Parecer sobre o Calendário Escolar do Mestrado em Engenharia de Produção.<br>3. Parecer sobre o mapa de exames Época Especial TPSI fora da ESTSetúbal.<br>4. Proposta de revisão dos Estatutos da ESTSetúbal<br>5. Aprovação da ata.                                                                                                                                                                                                                                                                                                                                                                                                                                                                                                                                                                                                                                                                     | 3          | 2           |            | 1               |
| 22 | CP_ESTS | 01/jul | 2    | 1. Informações;<br>2. Parecer sobre o Calendário Escolar do Mestrado em Engenharia de Produção;<br>3. Parecer sobre o mapa de exames Época Especial TPSI fora da ESTSetúbal/IPSetúbal;<br>4. Proposta de revisão dos Estatutos da ESTSetúbal/IPSetúbal;<br>5. Aprovação da ata.                                                                                                                                                                                                                                                                                                                                                                                                                                                                                                                                                                                                                                                | 3          | 2           |            | 1               |
| 23 | CP_ESTS | 13/set | 5    | 1. Votação sobre a divulgação de todos os resultados dos inqueritos pedagógicos realizados pelos estudantes da ESTSetúbal/IPSetúbal aos membros do CP;<br>2. Informações<br>3. Ratificação da votação por email sobre a organização do workshop "Metodologia entrada no aluno aplicada a uma UC" pela CEAP, sobre a permissão de acesso extraordinário ao exame de época especial da UC Órgãos de Máquinas e sobre o pedido de remarcação da data de exame desta UC;<br>4. Parecer sobre a proposta de nomeação de Coordenadores do Curso de Mestrado em Engenharia e Gestão de Energia na Indústria e Edifícios (MEGEIE), do CTeSP em Climatização e Energia (CE) e do CTeSP em Tecnologias e Programação de Sistemas de Informação (TPSI);<br>5. Parecer sobre a proposta de criação de turmas para as unidades curriculares Elementos de Matemática II e Probabilidade e Estatística a funcionar em semestre desencontrado. | 4          | 4           | 0          |                 |

| N  | ÓRGÃO   | Data   | Est. | Ordem de trabalhos                                                                                                                                                                                                                                                                                                                                                                                                       | Tópicos NG | Foro Pedag. | Estudantes | IPSetúbal Geral |
|----|---------|--------|------|--------------------------------------------------------------------------------------------------------------------------------------------------------------------------------------------------------------------------------------------------------------------------------------------------------------------------------------------------------------------------------------------------------------------------|------------|-------------|------------|-----------------|
| 24 | CP_ESTS | 19/set | 3    | 1. Informações;<br>2. Aprovação da ata da reunião do dia 13 de setembro de 2019;<br>3. Revisão sobre o modo de funcionamento das Comissões Eventuais criadas pelo CP;<br>4. Nomeação dos coordenadores das atuais Comissões Eventuais do CP;<br>5. Critérios de marcação dos momentos de avaliação fora das aulas das UC transversais;<br>6. Aprovação da ata.                                                           | 3          | 1           | 2          |                 |
| 25 | CP_ESTS | 24/set | 0    | 1. Informações;<br>2. Aprovação da ata da reunião do dia 13 de setembro 2019 (nova chamada);<br>3. Aprovação do documento revisto sobre as normas de marcação de testes e exames;<br>4. Parecer sobre os horários;<br>5. Análise de fichas de unidades curriculares no Sistema de Informação da ESTSetúbal/IPSetúbal;<br>6. Aprovação da ata.                                                                            | 3          | 3           |            |                 |
| 26 | CP_ESTS | 25/set | 0    | 1. Informações;<br>2. Aprovação da ata da reunião do dia 13 de setembro 2019 (nova chamada);<br>3. Aprovação do documento revisto sobre as normas de marcação de testes e exames;<br>4. Parecer sobre os horários;<br>5. Análise de fichas de unidades curriculares no Sistema de Informação da ESTSetúbal/IPSetúbal;<br>6. Aprovação da ata.                                                                            | 3          | 3           |            |                 |
| 27 | CP_ESTS | 09/out | 4    | 1. Informações;<br>2. Ratificação da votação por mail da ata de 13 setembro de 2019;<br>3. Proposta de mapa de testes de UC transversais de Licenciatura 1º semestre 2019-20;<br>4. Deliberações sobre pedidos de exoneração de membros das Comissões Eventuais;<br>5. Análise da proposta de inquéritos pedagógicos aos estudantes;<br>6. Aprovação da ata.                                                             | 3          | 2           | 1          |                 |
| 28 | CP_ESTS | 16/out | 3    | 1. Informações;<br>2. Parecer sobre os mapas de testes de CTeSP;                                                                                                                                                                                                                                                                                                                                                         | 1          | 1           |            |                 |
| 29 | CP_ESTS | 23/out | 0    | 1. Informações;<br>2. Ratificação da votação por email da ata de 16 de outubro de 2019;<br>3. Parecer sobre mapas de testes de CTeSP;<br>4. Parecer sobre mapas de testes de Licenciatura;<br>5. Análise da proposta de inquéritos pedagógicos aos estudantes;<br>6. Apresentação do relatório de atividades da CEAP;<br>7. Apresentação de queixa apresentada por um estudante do Curso de LEM;<br>8. Aprovação da ata. | 5          | 5           |            |                 |
| 30 | CP_ESTS | 30/out | 1    | 1. Informações;<br>2. Ratificação da votação por email da ata de 16 de outubro de 2019;                                                                                                                                                                                                                                                                                                                                  | 3          | 3           |            |                 |

| N  | ÓRGÃO   | Data   | Est. | Ordem de trabalhos                                                                                                                                                                                                                                                                                                                                                                                        | Tópicos NG | Foro Pedag. | Estudantes | IPSetúbal Geral |
|----|---------|--------|------|-----------------------------------------------------------------------------------------------------------------------------------------------------------------------------------------------------------------------------------------------------------------------------------------------------------------------------------------------------------------------------------------------------------|------------|-------------|------------|-----------------|
|    |         |        |      | 3. Parecer sobre mapas de testes de CTeSP;<br>4. Parecer sobre mapas de testes de Lições;<br>5. Análise da proposta de inquéritos pedagógicos aos estudantes.                                                                                                                                                                                                                                             |            |             |            |                 |
| 31 | CP_ESTS | 20/nov | 1    | 1. Informações;<br>2. Ratificação da votação por email da ata de 30 de outubro de 2019;<br>3. Apresentação de mapas de testes;<br>4. Parecer sobre mapas de exames de CTeSP;<br>5. Parecer sobre mapas de exames de Lições;<br>6. Apresentação de queixa apresentada por um estudante do Curso de LEM;<br>7. Votação da proposta de inquérito pedagógico da ESTSetúbal/IPSetúbal;<br>8. Aprovação da ata. | 5          | 5           |            |                 |
| 32 | CP_ESTS | 27/nov | 1    | 1. Informações;<br>2. Parecer sobre o mapa de exames de LEM;<br>3. Parecer sobre propostas de planos de estudo da ESTSetúbal/IPSetúbal;                                                                                                                                                                                                                                                                   | 2          | 1           |            | 1               |
| 33 | CP_ESTS | 18/dez | 0    | 1. Informações;<br>2. Ratificação da votação por email da ata de 27 de novembro de 2019;<br>3. Parecer sobre o mapa de testes do CTeSP em ARCI;<br>4. Parecer sobre o mapa de exames do MES;<br>5. Apresentação do relatório de atividades da CEAP;<br>6. Aprovação da ata.                                                                                                                               | 3          | 3           | 0          |                 |
| 34 | CP_ESTS | 20/dez | 1    | 1. Informações;<br>2. Ratificação da votação por email da ata de 27 de novembro de 2019;<br>3. Parecer sobre o mapa de testes do CTeSP em ARCI;<br>4. Parecer sobre o mapa de exames do MES;<br>5. Apresentação do relatório de atividades da CEAP;<br>6. Aprovação da ata.                                                                                                                               | 3          | 3           | 0          |                 |
| 35 | CR_ESE  | 18/set | 3    | Ponto 1: Aprender e emitir parecer sobre o Relatório de Atividades referente a 2018.<br>Ponto 2: Aprender e emitir parecer sobre o Plano de Atividades de 2019.<br>Ponto 3: Apresentação da metodologia a ser usada na atualização dos Estatutos da Escola Superior de Educação do Instituto Politécnico de Setúbal                                                                                       | 3          |             |            | 3               |
| 36 | CR_ESE  | 15/out | 2    | Ponto 1: Informações.<br>Ponto 2: Apresentação da versão preliminar da proposta de Revisão dos Estatutos da ESE/IPSetúbal.                                                                                                                                                                                                                                                                                | 1          |             |            | 1               |
| 37 | CR_ESE  | 26/nov | 2    | Ponto Único: Apresentação e aprovação da Versão Final da Proposta de Revisão dos Estatutos da ESE/IPSetúbal.                                                                                                                                                                                                                                                                                              | 1          |             |            | 1               |
| 38 | CP_ESE  | 26/mar | 8    | 1. Apresentação Ata;<br>2. Ponto situação: Processo de revisão do Regulamento de Frequência e Avaliação (RFA);<br>3. Inquéritos Pedagógicos;<br>4. PAEF;<br>5. Calendário Académico 2019/2020;<br>6. Monitorização das práticas das avaliações nas UC;                                                                                                                                                    | 5          | 5           |            |                 |

| N  | ÓRGÃO   | Data   | Est. | Ordem de trabalhos                                                                                                                                                                                                                                                                                                                                                                                                                                                                                                                                                                                                                                                                                                                                                        | Tópicos NG | Foro Pedag. | Estudantes | IPSetúbal Geral |
|----|---------|--------|------|---------------------------------------------------------------------------------------------------------------------------------------------------------------------------------------------------------------------------------------------------------------------------------------------------------------------------------------------------------------------------------------------------------------------------------------------------------------------------------------------------------------------------------------------------------------------------------------------------------------------------------------------------------------------------------------------------------------------------------------------------------------------------|------------|-------------|------------|-----------------|
|    |         |        |      | 7. Informações;<br>8. Apreciação da ata em minuta;                                                                                                                                                                                                                                                                                                                                                                                                                                                                                                                                                                                                                                                                                                                        |            |             |            |                 |
| 39 | CP_ESE  | 29/out | 7    | 1. Revisão do Regulamento;<br>2. Monitorização da avaliação das Unidades Curriculares;<br>3. Inquéritos Pedagógico;<br>a. Calendarização;<br>b. Balanço 1º semestre 2018/2019<br>4. Balanço da Releção 2019/2020;<br>5. Eleições para CP;<br>6. Análise de questões colocadas por estudantes;<br>7. Parecer (Necessidades Educativas Especiais);<br>8. Informações;<br>9. Apreciação da ata em minuta                                                                                                                                                                                                                                                                                                                                                                     | 6          | 5           | 1          |                 |
| 40 | CR_ESCE | 27/fev | 2    | 1. Aprovação dos membros externos a optar                                                                                                                                                                                                                                                                                                                                                                                                                                                                                                                                                                                                                                                                                                                                 | 1          |             |            | 1               |
| 41 | CR_ESCE | 10/abr | 3    | Eleição do Presidente da Assembleia de Representantes                                                                                                                                                                                                                                                                                                                                                                                                                                                                                                                                                                                                                                                                                                                     | 1          |             |            | 1               |
| 42 | CR_ESCE | 08/jul | 3    | 1. Nomeação do Vice-Presidente do Conselho de Representantes.<br>2. Discussão e validação da metodologia para a reestruturação dos Estatutos da ESCE/IPSetúbal                                                                                                                                                                                                                                                                                                                                                                                                                                                                                                                                                                                                            | 2          |             |            | 2               |
| 43 | CR_ESCE | 24/jul | 1    | 1. Apreciação e aprovação do Relatório de atividades de 2018 da ESCE/IPSetúbal                                                                                                                                                                                                                                                                                                                                                                                                                                                                                                                                                                                                                                                                                            | 1          |             |            | 1               |
| 44 | CR_ESCE | 13/nov | 0    | 1. Aprovação dos estatutos da ESCE-IPSetúbal                                                                                                                                                                                                                                                                                                                                                                                                                                                                                                                                                                                                                                                                                                                              | 1          |             |            | 1               |
| 45 | CP_ESCE | 43903  | 11   | 1- Nomeação de Secretário do Conselho Pedagógico;<br>2- Nomeação de Estudante para integrar a Comissão Executiva do Conselho Pedagógico;<br>3- Eleição de Estudante para integrar o Conselho Académico do IPSetúbal;<br>4- Apreciação dos calendários de avaliação para o 2º semestre do ano letivo 2018/2019;<br>5- Parecer sobre nomeação de Diretores de Curso;<br>6- Parecer sobre as comissões de avaliação e acompanhamento dos cursos;<br>7- Reflexão sobre o PAEF (Programa de Apoio a Estudantes Finalistas);<br>8- Nomeação de Comissão para estudo de carga média de trabalho necessária aos estudantes versus estimado em ECTS;<br>9- Reflexão sobre os resultados dos inquéritos pedagógicos por curso relativos ao ano letivo 2017/2018;<br>10- Informações | 9          | 5           | 3          | 1               |
| 46 | CP_ESCE | 43973  | 9    | 1- Aprovação da Ata da 51ª reunião;<br>2- Parecer sobre a Nomeação do Diretor de Curso da Licenciatura em Marketing;<br>3- Parecer sobre Nomeação da Comissão de Acompanhamento e Avaliação do MCE;<br>4- Parecer sobre Proposta de criação da Licenciatura em Marketing Digital e Tecnologia;<br>5- Parecer sobre Relatórios de Monitorização dos Cursos de 1.º e 2.º ciclo referente ao ano letivo 2017/2018;<br>6- Reflexão sobre os resultados dos inquéritos pedagógicos por curso relativos ao ano letivo 2017/2018;                                                                                                                                                                                                                                                | 7          | 5           |            | 2               |

| N  | ÓRGÃO   | Data   | Est. | Ordem de trabalhos                                                                                                                                                                                                                                                                                                                                                 | Tópicos NG | Foro Pedag. | Estudantes | IPSetúbal Geral |
|----|---------|--------|------|--------------------------------------------------------------------------------------------------------------------------------------------------------------------------------------------------------------------------------------------------------------------------------------------------------------------------------------------------------------------|------------|-------------|------------|-----------------|
|    |         |        |      | 7- Parecer sobre a proposta dos calendários letivos para o ano letivo 2019/2020;<br>8- Apresentação do trabalho desenvolvido para estudo de carga média de trabalho necessária aos estudantes versus estimado em ECTS;<br>9- Informações                                                                                                                           |            |             |            |                 |
| 47 | CP_ESCE | 44113  | 10   | 1- Aprovação da Ata da reunião anterior;<br>2- Apresentação dos calendários de avaliação para o 1º semestre do ano letivo 2019/20;<br>3- Parecer sobre Mestrado em Logística e Gestão da Cadeia de Abastecimento;<br>4- Parecer sobre questionário de avaliação da UC;<br>5- Arranque do ano letivo;<br>6- Informações;<br>7- Aprovação da Ata da presente reunião | 4          | 3           |            | 1               |
| 48 | CP_ESCE | 44185  | 7    | 1- Emissão de parecer do Relatório de Autoavaliação do Curso de Mestrado em Segurança e Higiene no Trabalho;<br>2- Aprovação da ata da presente reunião                                                                                                                                                                                                            | 1          | 1           |            |                 |
| 49 | CR_ESTB | 20/mar | 3    | 1. Pedido de suspensão de mandato;<br>2. Relatório de atividades da ESTBarreiro/IPSetúbal de 2017<br>3. Plano de atividades da ESTBarreiro/IPSetúbal para 2019<br>4. Outros Assuntos.                                                                                                                                                                              | 3          |             |            | 3               |
| 50 | CR_ESTB | 02/abr | 1    | 1. Aprovação da ata da reunião nº 36;<br>2. Plano de atividades da ESTBarreiro/IPSetúbal para 2019;<br>3. Outros Assuntos                                                                                                                                                                                                                                          | 1          |             |            | 1               |
| 51 | CR_ESTB | 08/mai | 2    | 1. Estatutos ESTBarreiro/IPSetúbal<br>2. Outros Assuntos.                                                                                                                                                                                                                                                                                                          | 1          |             |            | 1               |
| 52 | CR_ESTB | 15/jul | 2    | 1. Pedido de Renúncia do Diretor da ESTBarreiro/IPSetúbal<br>2. Regulamento e Calendário Eleitoral para a Eleição do Diretor da ESTBarreiro /IPSetúbal;<br>3. Estatutos da ESTBarreiro/IPSetúbal<br>4. Outros Assuntos                                                                                                                                             | 3          |             |            | 3               |
| 53 | CR_ESTB | 29/jul | 2    | 1. Aprovação da ata da 40ª reunião; Estatutos da ESTBarreiro/IPSetúbal<br>2. Outros Assuntos.                                                                                                                                                                                                                                                                      | 1          |             |            | 1               |
| 54 | CR_ESTB | 03/set | 2    | 1. Aprovação da ata da 41ª reunião<br>2. Pedido de suspensão de mandato;<br>3. Estatutos da ESTBarreiro/IPSetúbal;<br>4. Outros Assuntos                                                                                                                                                                                                                           | 2          |             |            | 2               |
| 55 | CR_ESTB | 13/set | 2    | 1. Aprovação da ata da 42ª reunião<br>2. Calendário Eleitoral para Eleição do Diretor<br>3. Estatutos da ESTBarreiro/IPSetúbal;<br>4. Outros Assuntos                                                                                                                                                                                                              | 2          |             |            | 2               |
| 56 | CR_ESTB | 19/set | 2    | 1. Aprovação da ata da reunião anterior;<br>2. Revisão dos Estatutos da ESTBarreiro/IPSetúbal;<br>3. Outros Assuntos                                                                                                                                                                                                                                               | 1          |             |            | 1               |
| 57 | CR_ESTB | 24/set | 2    | 1. Eleição do Diretor da Escola Superior de Tecnologia do Barreiro do Instituto Politécnico de Setúbal<br>2. Outros Assuntos                                                                                                                                                                                                                                       | 1          |             |            | 1               |
| 58 | CR_ESTB | 09/out | 2    | 1. Aprovação das atas das reuniões 44 e 45                                                                                                                                                                                                                                                                                                                         | 2          |             |            | 2               |

| N  | ÓRGÃO   | Data   | Est. | Ordem de trabalhos                                                                                                                                                                                                                                                                                                                                                | Tópicos NG | Foro Pedag. | Estudantes | IPSetúbal Geral |
|----|---------|--------|------|-------------------------------------------------------------------------------------------------------------------------------------------------------------------------------------------------------------------------------------------------------------------------------------------------------------------------------------------------------------------|------------|-------------|------------|-----------------|
|    |         |        |      | 2.Pedido de renúncia de mandato<br>3.Estatutos da ESTBarreiro/IPSetúbal;<br>4.Outros Assuntos.                                                                                                                                                                                                                                                                    |            |             |            |                 |
| 59 | CR_ESTB | 17/out | 2    | 1.Aprovação da ata da reunião 46<br>2.Aprovação da revisão dos Estatutos da 3. ESTBarreiro/IPSetúbal;<br>3. Outros Assuntos                                                                                                                                                                                                                                       | 1          |             |            | 1               |
| 60 | CP_ESTB | 10/dez | 1    | 1. Aprovação da ata da reunião anterior;<br>2. Abertura de processo de destituição;<br>3. Relatórios de autoavaliação;<br>4. Calendarização da avaliação contínua;<br>5. Análise dos sistemas de avaliação;<br>6. Inquéritos pedagógicos;<br>7. Outros assuntos                                                                                                   | 5          | 4           |            | 1               |
| 61 | CP_ESTB | 22/nov | 2    | 1. Aprovação da ata da reunião anterior;<br>2. Renúncia de mandato;<br>3. Calendarização da avaliação contínua;<br>4. Análise dos sistemas de avaliação;<br>5. Coordenadores de Curso;<br>6. Calendário de avaliações de 1º Semestre de 2019/2020;<br>7. Inquéritos pedagógicos;<br>8. Outros assuntos                                                            | 6          | 4           |            | 2               |
| 62 | CP_ESTB | 29/out | 2    | 1. Aprovação da ata da reunião anterior;<br>2. Calendarização da avaliação contínua;<br>3. Análise dos sistemas de avaliação;<br>4. Inquéritos pedagógicos;<br>5. Outros assuntos                                                                                                                                                                                 | 3          | 3           |            |                 |
| 63 | CP_ESTB | 18/set | 3    | 1. Aprovação da ata da reunião anterior;<br>2. Inquéritos pedagógicos ao 1º semestre de 2018/2019;<br>3. Sistemas de avaliação;<br>4. Regulamento de Avaliação das Aprendizagens;<br>5. Sessão de Acolhimento aos novos estudantes;<br>6. Outros assuntos                                                                                                         | 4          | 3           | 1          |                 |
| 64 | CP_ESTB | 27/jul | 2    | 1. Aprovação da ata da reunião anterior;<br>2. Apresentação dos Relatórios de monitorização dos Cursos da ESTBarreiro/IPSetúbal;<br>3. Promoção do Sucesso Escolar;<br>4. Outros assuntos                                                                                                                                                                         | 2          | 2           |            |                 |
| 65 | CP_ESTB | 22/mai | 4    | 1. Aprovação da ata da reunião anterior;<br>2. Calendarização da avaliação contínua do 2º semestre de 2018/2019;<br>3. Análise dos sistemas de avaliação das UC dos Cursos da ESTBarreiro/IPSetúbal;<br>4. Calendários dos Exames de Época Especial;<br>5. Programa de apoio ao estudante finalista;<br>6. Regimento e funcionamento do CP;<br>7. Outros assuntos | 5          | 4           |            | 1               |
| 66 | CP_ESTB | 29/abr | 4    | 1. Aprovação da ata da reunião anterior;                                                                                                                                                                                                                                                                                                                          | 5          | 4           |            | 1               |

| N  | ÓRGÃO   | Data   | Est. | Ordem de trabalhos                                                                                                                                                                                                                                                                                                                                                                                                                      | Tópicos NG | Foro Pedag. | Estudantes | IPSetúbal Geral |
|----|---------|--------|------|-----------------------------------------------------------------------------------------------------------------------------------------------------------------------------------------------------------------------------------------------------------------------------------------------------------------------------------------------------------------------------------------------------------------------------------------|------------|-------------|------------|-----------------|
|    |         |        |      | 2. Renúncia de mandato;<br>3. Calendarização da avaliação contínua do 2º semestre de 2018/2019;<br>4. Análise dos sistemas de avaliação das UC dos Cursos da ESTBarreiro/IPSetúbal;<br>5. Programa de apoio ao estudante finalista;<br>6. Relatório Abandono nas Licenciaturas no IPSetúbal;<br>7. Outros assuntos                                                                                                                      |            |             |            |                 |
| 67 | CP_ESTB | 03/abr | 3    | 1. Aprovação da ata da reunião anterior;<br>2. Calendarização da avaliação contínua do 2º semestre de 2018/2019;<br>3. Análise dos sistemas de avaliação das UC dos Cursos da ESTBarreiro/IPSetúbal;<br>4. Programa de apoio ao estudante finalista;<br>5. Semestre interanual;<br>6. Outros assuntos                                                                                                                                   | 4          | 3           |            | 1               |
| 68 | CP_ESTB | 06/mar | 5    | 1. Aprovação da ata da reunião anterior;<br>2. Comissões para Acompanhamento e Avaliação dos Ciclos de Estudo;<br>3. Eleição do Representante dos Estudantes no Conselho Académico do IPSetúbal;<br>4. Calendário de exames do 2º Semestre de 2018/2019;<br>5. Inquéritos Pedagógicos do 2.º semestre de 2017/2018;<br>6. Análise dos sistemas de avaliação das UC dos Cursos da ESTBarreiro/IPSetúbal<br>7. Outros assuntos            | 5          | 4           |            | 1               |
| 69 | CP_ESTB | 25/fev | 3    | 1. Aprovação da ata da reunião anterior;<br>2. Análise dos sistemas de avaliação das UC dos Cursos da ESTBarreiro/IPSetúbal;<br>3. Plano de Atividades de 2019;<br>4. Comissões para Acompanhamento e Avaliação dos Ciclos de Estudo;<br>5. Calendários Escolares de 2019/2020;<br>6. Eleição do Representante dos Estudantes no Conselho Académico do IPSetúbal;<br>7. Programa de apoio ao estudante finalista;<br>8. Outros assuntos | 6          | 3           | 1          | 2               |
| 70 | CP_ESTB | 28/jan | 5    | 1. Aprovação da ata da reunião anterior;<br>2. Análise dos sistemas de avaliação das UC dos Cursos da ESTBarreiro/IPSetúbal;<br>3. Relatório de Atividades de 2017;<br>4. Comissões para Acompanhamento e Avaliação dos Ciclos de Estudo;<br>5. Inquéritos Pedagógicos;<br>6. Cumprimento do Despacho n.º 137/Presidente/2018;<br>7. Outros assuntos                                                                                    | 5          | 3           |            | 2               |
| 71 | CR_ESS  | 10/jul | 2    | 1. Informações<br>1.1. Publicação dos Estatutos do IPSetúbal (Despacho Normativo n.º 13/2019 de 22 de abril)<br>2. Relatório de Atividades e Contas 2018<br>2.1. Apresentação                                                                                                                                                                                                                                                           | 3          |             |            | 3               |

| N  | ÓRGÃO  | Data    | Est. | Ordem de trabalhos                                                                                                                                                                                                                                                                                                                                                                                                                                                                                                                                                                                                                   | Tópicos NG | Foro Pedag. | Estudantes | IPSetúbal Geral |
|----|--------|---------|------|--------------------------------------------------------------------------------------------------------------------------------------------------------------------------------------------------------------------------------------------------------------------------------------------------------------------------------------------------------------------------------------------------------------------------------------------------------------------------------------------------------------------------------------------------------------------------------------------------------------------------------------|------------|-------------|------------|-----------------|
|    |        |         |      | 2.2. Análise e pronúncia<br>3. Plano de Atividades e orçamento 2019<br>3.1. Apresentação<br>3.2. Análise e pronúncia<br>4. Alteração dos Estatutos da ESS/IPSetúbal: metodologia e calendarização                                                                                                                                                                                                                                                                                                                                                                                                                                    |            |             |            |                 |
| 72 | CR_ESS | 18/set  | 3    | 1. Deliberação sobre as metodologias e cronograma da revisão dos Estatutos                                                                                                                                                                                                                                                                                                                                                                                                                                                                                                                                                           | 1          |             |            | 1               |
| 73 | CR_ESS | 10/out  | 3    | 1. Aprovação dos Estatutos                                                                                                                                                                                                                                                                                                                                                                                                                                                                                                                                                                                                           | 1          |             |            | 1               |
| 74 | CP_ESS | 27-Mai. | 4    | 1. Informações<br>2. Mapa de Avaliações do 2º semestre e Época de Recurso do CLTF<br>3. Relatório de Follow up do Curso de Licenciatura em Aupuntura<br>4. Outros assuntos                                                                                                                                                                                                                                                                                                                                                                                                                                                           | 2          | 2           |            |                 |
| 75 | CP_ESS | 20-Mar. | 6    | 1. Informações<br>2. Ratificação de pareceres online (Alterações da proposta de horário do CLA)<br>3. Aprovação da Ata da reunião nº65<br>4. Propostas de horários 2º semestre (CLTF e CMFT)<br>5. Proposta de mapa de avaliações do 2º semestre<br>6. Qualidade educativa – Divulgação dos Inquéritos Pedagógicos 1º semestre<br>7. Proposta de nova versão dos inquéritos pedagógicos<br>8. Impaio do despacho nº 40/presidente/ 2019 nos cursos de licenciatura da ESS-IPSetúbal<br>9. IPSetúbal - Design Innovation to Develop Week 2019<br>10. Dia Mundial da Saúde<br>11. Outros assuntos                                      | 7          | 6           |            | 1               |
| 76 | CP_ESS | 20-Fev  | 1    | 1. Informações<br>2. Ratificação da aprovação da ata da reunião anterior.<br>3. Ratificação de pareceres emitidos online:<br>- Mapa dos exames de época normal do CLE<br>- Regulamento Académico da ESS<br>- Horários do 2º semestre - CLFT, CLTF e CLA)<br>4. Proposta do Calendário Escolar 2019 – 2020<br>5. Coordenação de Cursos de Licenciatura em Terapia da Fala e Aupuntura.<br>Curso de Licenciatura em Terapia da Fala:<br>- Prof. Sónia Lima<br>Curso de Licenciatura em Aupuntura:<br>- Coordenador: Prof. Diogo Calado (em substituição de Helena Caria)<br>6. Dia Mundial da Saúde – 7 de abril<br>7. Outros Assuntos | 4          | 2           |            | 2               |
| 77 | CP_ESS | 17-jul. | 3    | 1. Informações;<br>2. Ratificação das votações on-line;<br>3. Mapa de Avaliações de Época de Recurso do CLFT;<br>4. Regulamento Académico;<br>5. Fichas de Unidade Curricular (CLA e CLE);                                                                                                                                                                                                                                                                                                                                                                                                                                           | 8          | 4           | 1          | 3               |



| N  | ÓRGÃO  | Data    | Est. | Ordem de trabalhos                                                                                                                                                                                                                                                                                                                                                                                                     | Tópicos NG | Foro Pedag. | Estudantes | IPSetúbal Geral |
|----|--------|---------|------|------------------------------------------------------------------------------------------------------------------------------------------------------------------------------------------------------------------------------------------------------------------------------------------------------------------------------------------------------------------------------------------------------------------------|------------|-------------|------------|-----------------|
|    |        |         |      | 6. PIESS_2019/2020;<br>7. Relatório de Atividades do CP_2019;<br>8. Outros Assuntos.<br>Inquéritos pedagógicos<br>Pano de Atividades do CP-ESS_2020<br>Reclamação de estudantes                                                                                                                                                                                                                                        |            |             |            |                 |
| 78 | CP_ESS | 17-Abr. | 7    | 1. Informações<br>2. Modelo das Atas das reuniões do CP<br>3. Proposta de calendário de avaliações_1º ano CLE<br>4. Proposta de calendário de avaliações_CLA<br>5. Proposta de Regulamento do Mestrado em Fisioterapia<br>6. Grupo Análise e Revisão Documental_mapa de avaliações_Responsabilidades do CP.<br>7. Regulamento Académico /Despacho do Sr. Presidente<br>8. Dia Mundial da Criança<br>9. Outros Assuntos | 6          | 3           | 1          | 2               |
| 79 | CP_ESS | 11-Set  | 4    | 1. Informações;<br>2. Ratificação das votações on-line;<br>3. Fichas de Unidade Curricular (CLA e CLE);<br>4. PIESS_2019/2020;<br>5. Proposta de horários 2019_2020;<br>6. Outros Assuntos                                                                                                                                                                                                                             | 3          | 2           |            | 1               |
| 80 | CP_ESS | 06-Nov. | 4    | 1. Informações<br>2. Ratificação da aprovação dos documentos colocados no moodle<br>3. Aprovação das atas das reuniões nº71 e nº72<br>4. Proposta de calendário de avaliações do CLTF<br>5. Eleição do estudante para CA<br>6. Inquéritos Pedagógicos – Datas<br>7. Nova proposta de inquérito pedagógico<br>8. Fichas de UC - CLE<br>9. Outros Assuntos                                                               | 5          | 4           | 1          |                 |
| 81 | CP_ESS | 04-Dez. | 5    | 1. Informações<br>2. Proposta de Novo Ciclo de Estudos<br>3. Proposta de Inquéritos Pedagógicos<br>4. Mapa Exames do CLE<br>5. Outros Assuntos                                                                                                                                                                                                                                                                         | 3          | 2           |            | 1               |
| 82 | CP_ESS | 02-Out. | 5    | 1. Informações;<br>2. Propostas de Horários_1º Semestre:<br>- CLFT 2019_2020<br>- CLE 2019_2020<br>- CLA 2019_2020<br>3. Proposta de Mapa de avaliações CLE (Av. Contínua e Época Normal)<br>4. Proposta de Mapa de Avaliações CLFT (Época Normal)<br>5. Fichas de Unidade Curricular (CLA, CLE, CLFT e CLFT);<br>6. Estatutos da ESS (Conselho Pedagógico)<br>7. Proposta de Regulamento de Ensino Clínico - CLE      | 7          | 5           |            | 2               |

| N  | ÓRGÃO  | Data   | Est. | Ordem de trabalhos                                                                                                                                                                                                                                                                                                                                                                                                                                                                                                                                                                                                                                                                                                                                                                                                                                                                                                                                                                                      | Tópicos NG | Foro Pedag. | Estudantes | IPSetúbal Geral |
|----|--------|--------|------|---------------------------------------------------------------------------------------------------------------------------------------------------------------------------------------------------------------------------------------------------------------------------------------------------------------------------------------------------------------------------------------------------------------------------------------------------------------------------------------------------------------------------------------------------------------------------------------------------------------------------------------------------------------------------------------------------------------------------------------------------------------------------------------------------------------------------------------------------------------------------------------------------------------------------------------------------------------------------------------------------------|------------|-------------|------------|-----------------|
|    |        |        |      | 8. Proposta de Criação de Novo Ciclo de estudos<br>9. Outros Assuntos.                                                                                                                                                                                                                                                                                                                                                                                                                                                                                                                                                                                                                                                                                                                                                                                                                                                                                                                                  |            |             |            |                 |
| 83 | CP_ESS | 16/jan | 7    | 1. Boas-vindas à nova Conselheira<br>2. Informações:<br>3. Aprovação da Ata da reunião nº62<br>4. Aprovação da Ata da reunião nº63<br>5. Proposta de mapa de exames de época normal do CLTF<br>6. Proposta de mapa de exames de época normal do CLFT<br>7. Relatório_Inquéritos Pedagógicos por Unidade Curricular (1º semestre)<br>8. Relatório_Inserção Profissional dos Diplomados do IPSetúbal (2015-2016)<br>9. Proposta de alteração da Ficha da UC de Comunicação em Saúde<br>10. Grupo de análise e revisão documental:<br>- Planeamento de atividades do grupo.<br>- Competências e funções do CP<br>- Recomendações de horários<br>- Proposta de layout para o mapa de avaliações a apresentar a CP<br>- Revisão do Regulamento Académico da ESS<br>11. Outros assuntos<br>- Relatório de clarificação de questões colocadas pelos estudantes do CLA/ UC:<br>Opções Terapêuticas: Farmacologia e Fitoterapia.<br>- Organização do Dia Mundial da Saúde (7 de Abril) e da Criança (1 de Junho) | 6          | 5           |            | 1               |

## Anexo S4 – Listagem das ordens de trabalho das reuniões dos órgãos do IPPortalegre, realizadas em 2019

| N | ÓRGÃO        | Data   | Estudantes | Ordem de trabalhos                                                                                                                                                                                                                                                                                                                              | Tópicos<br>NG | Foro<br>Pedagógico | Estudantes | IPP geral |
|---|--------------|--------|------------|-------------------------------------------------------------------------------------------------------------------------------------------------------------------------------------------------------------------------------------------------------------------------------------------------------------------------------------------------|---------------|--------------------|------------|-----------|
| 1 | CG IPP       | 06/mai | 1          | Tomada de posse dos estudantes eleitos para o CG;<br>Fixação das propinas;<br>Participação do IPPortalegre no Laboratório Colaborativo para as Biorefinarias;<br>Autorização para a alienação de património imobiliário;<br>Projeto Educativo, Científico, Cultural e Desportivo - aprovação do grupo de trabalho para coordenar a reformulação | 5             |                    | 2          | 3         |
| 2 | CG IPP       | 25/jun | 2          | Análise das contas anuais consolidadas de 2018;<br>Apreensão do relatório anual de atividades;<br>QUAR - Análise dos resultados de 2018;<br>PECCD - proposta metodológica                                                                                                                                                                       | 4             |                    | 1          | 3         |
| 3 | CG IPP       | 10/dez | 0          | Contrato de legislatura 2020-2023;<br>Orçamento do IPPortalegre para 2020;<br>Alteração ao Mapa de Pessoal;<br>Ponto de situação da alienação das antigas instalações da ESS                                                                                                                                                                    | 4             |                    |            | 4         |
| 4 | CP_ESECS_IPP | 10/abr | 3          | Calendário escolar;<br>Relatório do Sucesso Escolar;<br>Novo plano de estudos da licenciatura em Turismo;<br>Proposta de Pós-graduação em Linguagens e Literaturas                                                                                                                                                                              | 4             | 3                  |            | 1         |
| 5 | CP_ESECS_IPP | 12/jun | 2          | Apreensão do relatório de funcionamento das UC;<br>Apreensão do novo plano de estudos de educação básica                                                                                                                                                                                                                                        | 2             | 2                  |            |           |

|    |              |        |   |                                                                                                                                                                                                                                                                                                                                                                                                       |   |   |   |   |
|----|--------------|--------|---|-------------------------------------------------------------------------------------------------------------------------------------------------------------------------------------------------------------------------------------------------------------------------------------------------------------------------------------------------------------------------------------------------------|---|---|---|---|
| 6  | CP_ESECS_IPP | 02/out | 3 | Proposta de criação da licenciatura em Educação Social;<br>Calendário escolar;<br>Regimento CP;<br>Regulamento eleitoral do CP;<br>Designação da Comissão eleitoral para a eleição dos estudantes                                                                                                                                                                                                     | 5 | 1 |   | 4 |
| 7  | CP_ESECS_IPP | 18/dez | 3 | Apreensão do relatório de avaliação do curso de licenciatura em Serviço Social;<br>Apreensão do relatório de avaliação do curso de mestrado em Gerontologia                                                                                                                                                                                                                                           | 2 | 2 |   | 0 |
| 8  | CP_ESTG_IPP  | 30/out | 2 | Horários escolares;<br>Estudante internacional;<br>Aluno com necessidades educativas especiais                                                                                                                                                                                                                                                                                                        | 3 | 3 |   |   |
| 9  | CP_ESTG_IPP  | 21/mai | 1 | Abandono escolar;<br>Dossier Técnico-Pedagógico;<br>Ciclo de seminários;<br>Projeto tutorado                                                                                                                                                                                                                                                                                                          | 4 | 3 | 1 |   |
| 10 | CP_ESTG_IPP  | 28/mai | 0 | Projeto tutorado                                                                                                                                                                                                                                                                                                                                                                                      | 1 | 1 |   |   |
| 11 | CP_ESAE_IPP  | 29/mai | 3 | Calendário de exames;<br>Situação de Unidade Curricular;<br>Acessibilidades a alunos com mobilidade reduzida;<br>Transportes para as visitas de estudo                                                                                                                                                                                                                                                | 4 | 3 |   | 1 |
|    | CP_ESAE_IPP  | 02/out | 4 | Calendários de exames;<br>Relatórios de estágios - critérios a estabelecer;<br>Acessibilidades a alunos e funcionários com mobilidade reduzida;<br>Avaliação de requerimento de aluno com necessidades educativas especiais;<br>Condições das salas de aula / nº de alunos nas aulas práticas;<br>Disponibilização de aulas de apoio a alunos;<br>Condições de alojamento, da cantina e da residência | 8 | 7 |   | 1 |

|    |             |        |   |                                                                                                                     |   |   |  |   |
|----|-------------|--------|---|---------------------------------------------------------------------------------------------------------------------|---|---|--|---|
|    | CP_ESAE_IPP | 05/dez | 4 | Calendário de exames                                                                                                | 1 | 1 |  |   |
| 12 | CP_ESS_IPP  | 13/mar | 4 | Calendário letivo;<br>Comissões especializadas;<br>Regimento eleitoral do Conselho Pedagógico                       | 3 | 1 |  | 2 |
| 13 | CP_ESS_IPP  | 04/jul | 5 | Cessação dos mandatos, substituição e indigitação dos<br>representantes dos estudantes;<br>Comissões especializadas | 2 |   |  | 2 |
| 14 | CP_ESS_IPP  | 23/out | 4 | Processo eleitoral dos representantes dos estudantes;<br>Comissões especializadas                                   | 2 |   |  | 2 |

## Anexo S5 – Notas para o guião do questionário

- Esclarecer/validar/aprofundar dados recolhidos nas atas

Existir dois perfis de análise

1. Quem participou.
2. Quem não participou
3. Quem nunca participou

Caracterização dos estudantes:

4. Género
5. Curso
6. Grau
7. Área científica
8. Área geográfica
9. Já participou alguma vez em órgão das IES
10. Já teve participação cívica/política

## ELEIÇÕES

### Órgãos do Instituto/AA

Verifica-se que a % votantes é significativamente diferente entre o IPS e o IPP (maior neste último). No IPS, em regra, a % votantes para o CG é inferior à da AAIPS. É importante perceber porquê.

- Votou para o CG?
  - Porquê?
  - O que o motivou? (votar ou não votar)
  - Conhece o CG?
  - Conhece as atribuições do CG?
  - Entende que a informação pública sobre o que se passa no CG é suficiente?
  - Estaria disposto a participar no CG?
  - Tem conhecimento das ações/propostas dos representantes dos estudantes no CG?
  - Conhece os representantes dos estudantes no CG?
  - Estando eleito para o órgão, o que o leva a não participar no órgão?
  - Entende que deveria ser mais envolvido nos temas debatidos no CG?
- 
- Votou para a AA? Porquê? O que o motivou? (votar ou não votar)
  - Estaria disposto a participar no AA?
  - Qual o papel da AA no IPS? Tem conhecimento das atividades da AA?
  - Qual aquela a que dá mais valor?

Soube da existência das eleições? Como?

Na sua opinião o que deve ser feito para estimular os estudantes a participarem nas eleições dos órgãos?

### Órgãos das Escolas (CR/CP)

- Maior dimensão da Escola, menor participação nas eleições.

- Porquê? O que os motiva? A proximidade? A relação mais direta?
- Qual a importância do órgão para melhoria da Escola?
- Repletar algumas das perguntas do órgão da Instituição...
- Há alguma diferença no processo eleitoral entre as Escolas?
- Qual a importância do processo eleitoral?
- Quando vota, vota nos candidatos ou nas propostas dos candidatos?
- Conhece as propostas dos candidatos?

## **REUNIÕES**

### Participação

Novamente a maior participação dos estudantes acontece nas Escolas mais pequenas. A participação no CG também é menor. Importa perceber as causas.

- Menor Escola, maior proximidade, maior participação. Será assim?
- Que outras razões apontam?

### Assuntos

Nos assuntos tratados nas reuniões, entre os IP, verificamos um aspeto comum e outro distinto. Ambos abordam pouco os assuntos relacionados com os estudantes. No IPS predominam os tópicos pedagógicos e no IPP os IP Geral. Importa aprofundar e perceber a que se deve.

- Os estudantes não propõem assuntos para a agenda das reuniões?
- Como e quem prepara a agenda? Quais as motivações?
- Verificar as competências dos CP de ambos os IP.

## **INFORMAÇÃO ADICIONAL**

A recolha de informação foi difícil e demorada, denotando falta de centralização e de controlo sobre a mesma. Isto significa que a informação não está disponível, colocando em causa a transparência e não estimulando a participação e acompanhamento do funcionamento dos órgãos. Este aspeto deve ser aprofundado, procurando-se saber, designadamente:

- Quem é responsável pelo arquivo das atas do CP e do CG?
- As atas estão disponíveis? Onde?

Para quem já participou em algum órgão de gestão:

- Como avalia a experiência?
- São ouvidos nas reuniões?

- Considera que as decisões tomadas nas reuniões produzem efeitos?
- Voltaria a participar?
- O que sugere para melhorar a participação dos estudantes? (medidas: ex. número de estudantes superior, benefícios para os estudantes)

Para os dirigentes do Instituto e das Escolas sobre a participação dos estudantes nos Órgãos:

- Como avalia a participação dos estudantes?
- Conhece os motivos da ausência dos estudantes nas reuniões?
- Considera que o número de estudantes nos órgãos é suficiente?
- O que sugere para melhorar a qualidade da participação dos estudantes nos Órgãos?



## Anexo S6 – Guião de entrevista aos estudantes do IPP e IPS selecionados

| Dimensões                                                                                                                                        | Tópicos                                                                                                                                                                                                                   | Questões                                                                                                                                                                                                                                                                                                                                                                                                                                                                                                                                                                                                                                                                                                                                                                                                                                                                                                                                                                                                                                                                                                                                                                                                                                                                                             |
|--------------------------------------------------------------------------------------------------------------------------------------------------|---------------------------------------------------------------------------------------------------------------------------------------------------------------------------------------------------------------------------|------------------------------------------------------------------------------------------------------------------------------------------------------------------------------------------------------------------------------------------------------------------------------------------------------------------------------------------------------------------------------------------------------------------------------------------------------------------------------------------------------------------------------------------------------------------------------------------------------------------------------------------------------------------------------------------------------------------------------------------------------------------------------------------------------------------------------------------------------------------------------------------------------------------------------------------------------------------------------------------------------------------------------------------------------------------------------------------------------------------------------------------------------------------------------------------------------------------------------------------------------------------------------------------------------|
| Cara-terização do respondente                                                                                                                    | Instituição/Curso/Ano Curricular<br>Naturalidade e/residência atual                                                                                                                                                       | Idade<br>Estatuto                                                                                                                                                                                                                                                                                                                                                                                                                                                                                                                                                                                                                                                                                                                                                                                                                                                                                                                                                                                                                                                                                                                                                                                                                                                                                    |
| A. Conhecimento do modelo de gestão das instituições de ensino superior politécnico e das hipóteses de participação dos estudantes nele contidas | 1. <i>Participação formal nos órgãos da escola e/ou IPS</i><br>Eleições<br>Órgãos de gestão<br><br>2. <i>Participação nos órgãos próprios dos estudantes a nível da escola, IPS e plataformas nacionais de estudantes</i> | 1. Em que âmbitos conhece a participação dos estudantes? / Como é que os estudantes podem participar na vida institucional?<br>- Órgãos em que os estudantes têm representação a nível da escola e do IP<br>- Órgãos que os estudantes podem eleger e como o podem fazer<br>- Conhecimento da lei e/ou outros regulamentos específicos/ Se sim, como o obteve.<br>- Conhece as competências de cada órgão? E as competências dos estudantes em cada órgão?<br>- Outras formas de participação para além dos órgãos formalmente instituídos.<br><br>2. Qual é o conhecimento que tem da Associação Académica? Conhece a sua estrutura e funções? Sabe como pode participar na mesma? Relativamente a associações ou federações nacionais ou internacionais de agregação de estudantes ou suas associações tem algum conhecimento? Se sim, como o obteve?                                                                                                                                                                                                                                                                                                                                                                                                                                              |
| B. Experiência(s) de participação                                                                                                                | 1.<br>2.<br>3. Se houve experiência, como é que foi, se não houve, que razões<br>4. Experiências de participação fora do IPS                                                                                              | 1. 1. Tem ou já teve alguma participação na vida institucional da sua escola / instituto?<br>1.2. Num órgão de gestão? Qual ou quais? Durante quanto tempo?<br>2. 1. Noutro âmbito de participação para além dos órgãos de gestão? Em que âmbitos? Durante quanto tempo?<br>Que razões a/o levaram a participar? Ou a não participar?<br>2.2. Conhece a Associação Académica do IPS? Já participou em algum dos seus órgãos de gestão e/ou comissões nesse âmbito criadas? E em algumas das suas atividades? Quais?<br>3. Avalie os aspetos mais e menos positivos da sua experiência<br>Questões adicionais a 3 se não tiverem fornecido:<br>- Mais concretamente, como descreve a sua participação na sua escola / Instituto?<br>- Que opiniões expressou? Sobre que temas? Que propostas fez?<br>- Como avalia o impacto da sua participação? nos colegas? Nos docentes?<br>- Consegue enunciar alguma medida concreta que tenha resultado da intervenção dos estudantes?<br>- Que feedback obteve por parte dos responsáveis dos órgãos dos quais participou? E de outros órgãos?<br>4. Fora do âmbito escolar tem ou teve alguma participação em atividades políticas, sociais, culturais, etc. Pode descrevê-las genericamente? ( <i>se políticas, é desnecessário identificar o partido</i> ) |
| C. Atitude e opinião sobre a participação dos estudantes no atual modelo de gestão do ensino superior                                            | 1.<br>2.<br>3. Sugestões de melhorias e/ou alteração ao modelo                                                                                                                                                            | 1. Qual é para si o contributo específico dos estudantes na vida institucional?<br>2. Que importância atribui aos órgãos e porquê?<br>Comissões de Acompanhamento e Avaliação do Curso<br>- Conselho Pedagógico da Escola<br>- Conselho de Representantes da Escola<br>- Conselho Geral<br>- Conselho Académico<br>- Provedor do estudante<br>- Associação Académica<br>3. Considera que os estudantes deviam fazer parte de algum órgão de gestão do qual não fazem? Considera que deveria existir algum órgão de gestão que não existe?                                                                                                                                                                                                                                                                                                                                                                                                                                                                                                                                                                                                                                                                                                                                                            |

| Dimensões                                                                                                                                         | Tópicos                                                             | Questões                                                                                                                                                                                                                                                                                                                                                                                                                                                                                                                                                                                    |
|---------------------------------------------------------------------------------------------------------------------------------------------------|---------------------------------------------------------------------|---------------------------------------------------------------------------------------------------------------------------------------------------------------------------------------------------------------------------------------------------------------------------------------------------------------------------------------------------------------------------------------------------------------------------------------------------------------------------------------------------------------------------------------------------------------------------------------------|
| Caraíterização do respondente                                                                                                                     | Instituição/Curso/Ano Curricular<br>Naturalidade e/residência atual | Idade<br>Estatuto                                                                                                                                                                                                                                                                                                                                                                                                                                                                                                                                                                           |
|                                                                                                                                                   |                                                                     | <p>3.1. Que ideia tem sobre o nível de participação dos estudantes na vida institucional da escola e do IPS? Como é que considera que se poderia incentivar os estudantes a participar mais? Que medidas devem ser adotadas? Por quem?</p> <p><i>A média de participação dos estudantes nos atos eleitorais para o CG dos últimos 5 anos varia entre 4,6% e 9,7% (no IPS) entre 24% e 37% (no IPP). Como interpreta estes resultados?</i></p> <p>3.2. Quais foram, na sua opinião, os contributos concretos da participação dos estudantes para a sua instituição escola? E para o IPS?</p> |
| D. Só se houve experiência de participação:<br>Potencial de replicação da aprendizagem feita para outras dimensões da vida cívica ou profissional |                                                                     | <p>O que considera ter aprendido como pessoa e cidadão com a sua participação?</p> <p>Até que ponto considera que esta experiência vai ser relevante para si no futuro como cidadão e/ou profissional?</p> <p>Tem vontade de participar na vida política e/ou cívica a nível local, nacional e ou internacional. Se sim porquê? Se não porquê?</p>                                                                                                                                                                                                                                          |
